# Supplementary material for: The Axin scaffold protects the kinase GSK3β from cross-pathway inhibition
Source: eLife. 2023 Aug 7;12:e85444. doi: 10.7554/eLife.85444 (PMC10442075; doi:10.7554/eLife.85444)
Supplement: Figure 2—source data 1. [file elife-85444-fig2-data1.xlsx]

## Sheet: Figure 2
		Phosphorylation at Ser9 inhibits GSK3β activity towards pS45-β-catenin
		Figure 2
		pS9-GSK data: varied pS45-B-catenin, 10 nM pS9-GSK, 100 uM ATP, 05/25/22 experiment, MG
		unphosphorylated GSK data: varied pS45-B-catenin, 10 nM GSK, 100 uM ATP, 05/31/22 experiment, MG
		GSK_S9A data: varied pS45-B-catenin, 10 nM GSK_S9A, 100 uM ATP, 06/07/22 experiment, MG
		pS9-GSK data, no Axin
			Replicate 1	Replicate 2	Replicate 3			Average	Error (standard deviation)
		[pS45-B-catenin] (uM)	Rate (uM/min)	Rate (uM/min)	Rate (uM/min)		[pS45-B-catenin] (uM)	Rate (uM/min)	Rate (uM/min)
		0.02	7.62e-06	2.29e-05	7.46e-06		0.02	1.27e-05	8.87
		0.1	7.99e-05	0.000354	0.000199		0.1	0.000211	0.000137
		0.25	0.000225	0.000404	0.00046		0.25	0.000363	0.000123
		0.5	0.00157	0.00151	0.000741		0.5	0.00127	0.000462
		1	0.00359	0.00172	0.00192		1	0.00241	0.00103
		2	0.00799	0.00399	0.00547		2	0.00582	0.00202
		unphosphorylated GSK data, no Axin
			Replicate 1	Replicate 2	Replicate 3			Average	Error (standard deviation)
		[pS45-B-catenin] (uM)	Rate (uM/min)	Rate (uM/min)	Rate (uM/min)		[pS45-B-catenin] (uM)	Rate (uM/min)	Rate (uM/min)
		0.02	0.000558	0.00101	0.000675		0.02	0.000748	0.000235
		0.1	0.0275	0.027	0.0283		0.1	0.0276	0.000656
		0.25	0.0836	0.0757	0.0776		0.25	0.079	0.00412
		0.5	0.1186	0.1022	0.0945		0.5	0.105	0.0123
		1	0.1388	0.1344	0.122		1	0.132	0.00871
		2	0.1374	0.1482	0.1322		2	0.139	0.00816
		GSK_S9A data, no Axin
			Replicate 1	Replicate 2	Replicate 3			Average	Error (standard deviation)
		[pS45-B-catenin] (uM)	Rate (uM/min)	Rate (uM/min)	Rate (uM/min)		[pS45-B-catenin] (uM)	Rate (uM/min)	Rate (uM/min)
		0.02	0.00461	0.0022	0.00382		0.02	0.00354	0.00123
		0.1	0.0321	0.0424	0.0362		0.1	0.0369	0.00519
		0.25	0.0614	0.0836	0.0845		0.25	0.0765	0.0131
		0.5	0.1226	0.1029	0.1148		0.5	0.113	0.00992
		1	0.1167	0.1479	0.1442		1	0.136	0.017
		2	0.123	0.1595	0.1395		2	0.141	0.0183
