# Supplementary material for: The Axin scaffold protects the kinase GSK3β from cross-pathway inhibition
Source: eLife. 2023 Aug 7;12:e85444. doi: 10.7554/eLife.85444 (PMC10442075; doi:10.7554/eLife.85444)
Supplement: Figure 3—source data 1. [file elife-85444-fig3-data1.xlsx]

## Sheet: Figure 3
		Axin restores the KM for β-catenin but cannot overcome pS9-GSK3β inactivation
		Figure 3A
		5/25/2022, MG	vary pS45-B-catenin with unphosphorylated GSK +/- Axin_FL, primed Bcat phosphorylation
		Experiment: varied pS45-B-catenin, 10 nM pS9-GSK, 100 uM ATP, +/- 500nM Axin_FL
		pS9-GSK data, no Axin										pS9-GSK data, with Axin_FL
			Replicate 1	Replicate 2	Replicate 3			Average	Error (standard deviation)				Replicate 1	Replicate 2	Replicate 3			Average	Error (standard deviation)
		[pS45-B-catenin] (uM)	Rate (uM/min)	Rate (uM/min)	Rate (uM/min)		[pS45-B-catenin] (uM)	Rate (uM/min)	Rate (uM/min)			[pS45-B-catenin] (uM)	Rate (uM/min)	Rate (uM/min)	Rate (uM/min)		[pS45-B-catenin] (uM)	Rate (uM/min)	Rate (uM/min)
		0.02	7.62e-06	2.29e-05	7.46e-06		0.02	1.27e-05	8.87			0.02	0.000461	0.000368	0.000373		0.02	0.000401	5.23e-05
		0.1	7.99e-05	0.000354	0.000199		0.1	0.000211	0.000137			0.1	0.00253	0.00286	0.00371		0.1	0.00303	0.000609
		0.25	0.000225	0.000404	0.00046		0.25	0.000363	0.000123			0.25	0.00927	0.00893	0.00872		0.25	0.00897	0.000278
		0.5	0.00157	0.00151	0.000741		0.5	0.00127	0.000462			0.5	0.013	0.0136	0.0113		0.5	0.0126	0.00119
		1	0.00359	0.00172	0.00192		1	0.00241	0.00103			1	0.0128	0.0145	0.0129		1	0.0134	0.000954
		2	0.00799	0.00399	0.00547		2	0.00582	0.00202			2	0.015	0.0133	0.0159		2	0.0147	0.00132
		Figure 3B
		5/31/2022, MG	vary pS45-B-catenin with unphosphorylated GSK +/- Axin_FL, primed Bcat phosphorylation
		Experiment: varied pS45-B-catenin, 10 nM GSK, 100 uM ATP, +/- 500nM Axin_FL
		unphosphorylated GSK data, no Axin										unphosphorylated GSK data, with Axin_FL
			Replicate 1	Replicate 2	Replicate 3			Average	Error (standard deviation)				Replicate 1	Replicate 2	Replicate 3			Average	Error (standard deviation)
		[pS45-B-catenin] (uM)	Rate (uM/min)	Rate (uM/min)	Rate (uM/min)		[pS45-B-catenin] (uM)	Rate (uM/min)	Rate (uM/min)			[pS45-B-catenin] (uM)	Rate (uM/min)	Rate (uM/min)	Rate (uM/min)		[pS45-B-catenin] (uM)	Rate (uM/min)	Rate (uM/min)
		0.02	0.000558	0.00101	0.000675		0.02	0.000748	0.000235			0.02	0.0106	0.00932	0.0145		0.02	0.0115	0.0027
		0.1	0.0275	0.027	0.0283		0.1	0.0276	0.000656			0.1	0.0795	0.0686	0.0826		0.1	0.0769	0.00735
		0.25	0.0836	0.0757	0.0776		0.25	0.079	0.00412			0.25	0.1078	0.1163	0.1387		0.25	0.121	0.016
		0.5	0.1186	0.1022	0.0945		0.5	0.105	0.0123			0.5	0.1642	0.1576	0.1486		0.5	0.157	0.00783
		1	0.1388	0.1344	0.122		1	0.132	0.00871			1	0.1835	0.1703	0.1557		1	0.17	0.0139
		2	0.1374	0.1482	0.1322		2	0.139	0.00816			2	0.2001	0.1894	0.1695		2	0.186	0.0155
		Figure 3C
		6/7/2022, MG	vary pS45-B-catenin with GSK_S9A +/- Axin_FL, primed Bcat phosphorylation
		Experiment: varied pS45-B-catenin, 10 nM GSK_S9A, 100 uM ATP, +/- 500nM Axin_FL
		GSK_S9A data, no Axin										GSK_S9A data, with Axin_FL
			Replicate 1	Replicate 2	Replicate 3			Average	Error (standard deviation)				Replicate 1	Replicate 2	Replicate 3			Average	Error (standard deviation)
		[pS45-B-catenin] (uM)	Rate (uM/min)	Rate (uM/min)	Rate (uM/min)		[pS45-B-catenin] (uM)	Rate (uM/min)	Rate (uM/min)			[pS45-B-catenin] (uM)	Rate (uM/min)	Rate (uM/min)	Rate (uM/min)		[pS45-B-catenin] (uM)	Rate (uM/min)	Rate (uM/min)
		0.02	0.00461	0.0022	0.00382		0.02	0.00354	0.00123			0.02	0.0117	0.0111	0.012		0.02	0.0116	0.000458
		0.1	0.0321	0.0424	0.0362		0.1	0.0369	0.00519			0.1	0.0778	0.0807	0.0871		0.1	0.0819	0.00476
		0.25	0.0614	0.0836	0.0845		0.25	0.0765	0.0131			0.25	0.115	0.1159	0.1481		0.25	0.126	0.0189
		0.5	0.1226	0.1029	0.1148		0.5	0.113	0.00992			0.5	0.137	0.1643	0.1442		0.5	0.149	0.0141
		1	0.1167	0.1479	0.1442		1	0.136	0.017			1	0.1627	0.168	0.1844		1	0.172	0.0113
		2	0.123	0.1595	0.1395		2	0.141	0.0183			2	0.1837	0.1923	0.1811		2	0.186	0.00586
		Figure 3D
		With Axin_FL data from figures 3A-C
		pS9-GSK data, with Axin_FL
			Replicate 1	Replicate 2	Replicate 3			Average	Error (standard deviation)
		[pS45-B-catenin] (uM)	Rate (uM/min)	Rate (uM/min)	Rate (uM/min)		[pS45-B-catenin] (uM)	Rate (uM/min)	Rate (uM/min)
		0.02	0.000461	0.000368	0.000373		0.02	0.000401	5.23e-05
		0.1	0.00253	0.00286	0.00371		0.1	0.00303	0.000609
		0.25	0.00927	0.00893	0.00872		0.25	0.00897	0.000278
		0.5	0.013	0.0136	0.0113		0.5	0.0126	0.00119
		1	0.0128	0.0145	0.0129		1	0.0134	0.000954
		2	0.015	0.0133	0.0159		2	0.0147	0.00132
		unphosphorylated GSK data, with Axin_FL
			Replicate 1	Replicate 2	Replicate 3			Average	Error (standard deviation)
		[pS45-B-catenin] (uM)	Rate (uM/min)	Rate (uM/min)	Rate (uM/min)		[pS45-B-catenin] (uM)	Rate (uM/min)	Rate (uM/min)
		0.02	0.0106	0.00932	0.0145		0.02	0.0115	0.0027
		0.1	0.0795	0.0686	0.0826		0.1	0.0769	0.00735
		0.25	0.1078	0.1163	0.1387		0.25	0.121	0.016
		0.5	0.1642	0.1576	0.1486		0.5	0.157	0.00783
		1	0.1835	0.1703	0.1557		1	0.17	0.0139
		2	0.2001	0.1894	0.1695		2	0.186	0.0155
		GSK_S9A data, with Axin_FL
			Replicate 1	Replicate 2	Replicate 3			Average	Error (standard deviation)
		[pS45-B-catenin] (uM)	Rate (uM/min)	Rate (uM/min)	Rate (uM/min)		[pS45-B-catenin] (uM)	Rate (uM/min)	Rate (uM/min)
		0.02	0.0117	0.0111	0.012		0.02	0.0116	0.000458
		0.1	0.0778	0.0807	0.0871		0.1	0.0819	0.00476
		0.25	0.115	0.1159	0.1481		0.25	0.126	0.0189
		0.5	0.137	0.1643	0.1442		0.5	0.149	0.0141
		1	0.1627	0.168	0.1844		1	0.172	0.0113
		2	0.1837	0.1923	0.1811		2	0.186	0.00586
