# Supplementary material for: The Axin scaffold protects the kinase GSK3β from cross-pathway inhibition
Source: eLife. 2023 Aug 7;12:e85444. doi: 10.7554/eLife.85444 (PMC10442075; doi:10.7554/eLife.85444)
Supplement: Figure 4—source data 1. [file elife-85444-fig4-data1.xlsx]

## Sheet: Figure 4
		Axin prevents phosphorylation of GSK3β at Ser9
		Figure 4A
		5/18/2022, MG	vary GSK with PKA +/- Axin_FL, GSK phosphorylation
		Experiment: varied GSK, 20 nM PKA, 100 uM ATP, +/- 500nM Axin_FL
		9/30/2022, MG : varied GSK, 20 nM PKA, 100 uM ATP, with 500nM miniAxin
		3/30/2023, MG: varied GSK, 20 nM PKA, 100 uM ATP, with 500nM Axin peptide
		PKA phosphorylation of GSK, no Axin
			Replicate 1	Replicate 2	Replicate 3			Average	Error (standard deviation)
		[GSK] (uM)	Rate (uM/min)	Rate (uM/min)	Rate (uM/min)		[GSK] (uM)	Rate (uM/min)	Rate (uM/min)
		0.005	0.000822	0.000483	0.000453		0.005	0.000586	0.000205
		0.02	0.00218	0.00297	0.00245		0.02	0.00253	0.000402
		0.05	0.00391	0.00392	0.00401		0.05	0.00395	5.51e-05
		0.1	0.00475	0.0055	0.00578		0.1	0.00534	0.000533
		0.5	0.00771	0.00782	0.00869		0.5	0.00807	0.000537
		PKA phosphorylation of GSK, with Axin_FL
			Replicate 1	Replicate 2	Replicate 3			Average	Error (standard deviation)
		[GSK] (uM)	Rate (uM/min)	Rate (uM/min)	Rate (uM/min)		[GSK] (uM)	Rate (uM/min)	Rate (uM/min)
		0.005	0.000158	5.14e-05	6.05e-05		0.005	9e-05	5.91e-05
		0.02	0.000354	0.000321	0.000578		0.02	0.000418	0.00014
		0.05	0.00104	0.000824	0.000578		0.05	0.000814	0.000231
		0.1	0.00183	0.00145	0.00131		0.1	0.00153	0.000269
		0.5	0.00377	0.00334	0.00343		0.5	0.00351	0.000227
		PKA phosphorylation of GSK, with miniAxin
			Replicate 1	Replicate 2	Replicate 3			Average	Error (standard deviation)
		[GSK] (uM)	Rate (uM/min)	Rate (uM/min)	Rate (uM/min)		[GSK] (uM)	Rate (uM/min)	Rate (uM/min)
		0.005	9.26e-05	7.26e-05	5.48e-05		0.005	7.33e-05	1.89e-05
		0.02	0.000212	0.000219	0.000202		0.02	0.000211	8.54e-06
		0.05	0.00118	0.00123	0.00091		0.05	0.00111	0.000172
		0.1	0.00141	0.0018	0.00199		0.1	0.00173	0.000296
		0.3	0.00318	0.0035	0.00368		0.3	0.00345	0.000253
		0.5	0.00334	0.00407	0.00427		0.5	0.00389	0.00049
		PKA phosphorylation of GSK, with Axin peptide
			Replicate 1	Replicate 2	Replicate 3			Average	Error (standard deviation)
		[GSK] (uM)	Rate (uM/min)	Rate (uM/min)	Rate (uM/min)		[GSK] (uM)	Rate (uM/min)	Rate (uM/min)
		0.005	4e-05	7.57e-05	5.57e-05		0.005	5.71333e-05	1.78931e-05
		0.02	0.000232	0.000321	0.000311		0.02	0.000288	4.87545e-05
		0.05	0.000861	0.000839	0.000721		0.05	0.000807	7.52861e-05
		0.1	0.0014	0.00146	0.00137		0.1	0.00141	4.58258e-05
		0.3	0.00385	0.00335	0.00287		0.3	0.00335667	0.000490034
		0.5	0.00455	0.00435	0.00349		0.5	0.00413	0.000563205
		Figure 4B
		6/10/2022, MG	vary CREB_peptide with PKA +/- Axin_FL, GSK phosphorylation
		Experiment: varied CREB_peptide, 20 nM PKA, 100 uM ATP, +/- 500nM Axin_FL
		PKA phosphorylation of CREB_peptide, no Axin
			Replicate 1	Replicate 2	Replicate 3			Average	Error (standard deviation)
		[CREB_pep] (uM)	Rate (uM/min)	Rate (uM/min)	Rate (uM/min)		[CREB_pep] (uM)	Rate (uM/min)	Rate (uM/min)
		0.005	0.000783	0.000572	0.000703		0.005	0.000686	0.000107
		0.02	0.00228	0.00344	0.00236		0.02	0.002693	0.000648
		0.05	0.00752	0.00702	0.00584		0.05	0.00679	0.000863
		0.1	0.0108	0.0111	0.0116		0.1	0.0112	0.000404
		0.5	0.0206	0.0206	0.0225		0.5	0.0212	0.0011
		1	0.0223	0.0254	0.0223		1	0.0233	0.00179
		PKA phosphorylation of CREB_peptide, with Axin_FL
			Replicate 1	Replicate 2	Replicate 3			Average	Error (standard deviation)
		[CREB_pep] (uM)	Rate (uM/min)	Rate (uM/min)	Rate (uM/min)		[CREB_pep] (uM)	Rate (uM/min)	Rate (uM/min)
		0.005	0.00106	0.00106	0.00101		0.005	0.00104	2.89e-05
		0.02	0.00452	0.00351	0.00419		0.02	0.00407	0.000515
		0.05	0.00705	0.00773	0.00751		0.05	0.00743	0.000347
		0.1	0.0118	0.0107	0.0115		0.1	0.0113333	0.000569
		0.5	0.0218	0.0195	0.023		0.5	0.0214	0.00178
		1	0.0245	0.0256	0.0246		1	0.0249	0.000608
		Figure 4C
		6/28/23, NJ & MG	Axin overexpression in HEK293 cells compared against cells overexpressing a negative control
		Experiment: quantitative phospho western blotting for pS9 and total GSK in cells overexpressing Axin or a negative control
			+Axin	-Axin
			pS9 GSK to GSK ratio	pS9 GSK to GSK ratio
		Replicate 1	0.586627	1.12178			+Axin	-Axin
		Replicate 2	0.622448	1.14119		Mean pS9 GSK to GSK ratio	0.640067	1.13766
		Replicate 3	0.711127	1.15003		Standard deviation	0.0640929	0.0144488
