# Supplementary material for: The Axin scaffold protects the kinase GSK3β from cross-pathway inhibition
Source: eLife. 2023 Aug 7;12:e85444. doi: 10.7554/eLife.85444 (PMC10442075; doi:10.7554/eLife.85444)
Supplement: Source data 1. [file elife-85444-data1.xlsx]

## Sheet: Figure 2-figure supplement 1
	Characterization of purified proteins
	Figure 2-figure supplement 1C and 1D
	Experiment: 11/08/22 MG
	50nM of each protein, diluted 1:4 before loading on the gel
			raw fluorescence		normalized fluorescence
	pS9-GSK blot	unphosphorylated GSK	22958		22958
		pS9-GSK	3869349		2.59011e+06
		GSK_S9A	40204		29687.7
		GSK (not treated)	103627		233136
	MBP blot	unphosphorylated GSK	283072		1
		pS9-GSK	422880		1.4939
		GSK_S9A	383345		1.35423
		GSK (not treated)	125823		0.444491
	pY216-GSK blot	unphosphorylated GSK	498405		498405
		pS9-GSK	880912		589674
		GSK_S9A	864098		638073
		GSK (not treated)	303847		683584

## Sheet: Figure 2-figure supplement 2
	Protein phosphorylation kinetic assays
	Figure 2-figure supplement 2B
	primed Bcat endpoint time course						pS9-GSK endpoint time course						pS133-CREB_peptide endpoint time course
	Experiment: 100nM GSK3B (not dx), 50nM primed Bcat, 200uM ATP						50nM GSK_dx, 100nM PKA, 200uM ATP						50nM CREB_pep, 100nM PKA, 200uM ATP
	6/15/2022, MG						1:4 dilution of all points before loading on the gel						6/9/2022, MG
							9/8/2022, MG
	Time (min)	Fluorescence						Time (min)	Fluorescence					Time (min)	Fluorescence
	0	104709						0	838					0	1583
	0.166667	852187						0.5	336264					0.166667	143489
	0.5	1353777						2	1072900					0.5	391163
	1	1778928						5	2114456					1	606140
	2	2143109						10	3250870					2	843137
	5	2445967						30	5137732					5	1003524
	7	2349857						60	5985997					10	1021735
	10	2438654						120	6130889					30	972472
	final endpoint	2413824						180	6086763					60	1061494
	final endpoint	2433296						240	6613382					120	1063388
	final endpoint	2509045						300	6385039
								1320	6915007					final endpoint	1063174
	final endpoint average	2452055						final endpoint	6373579					final endpoint	962159
								4/23 endpoint	6029368					pS129 CREB_pep endpoint, 2020 paper	1230738
														50nM purified primed CREB_pep	1351610
	Figure 2-figure supplement 2C
	pS45-Bcatenin antibody linearity test						pS9-GSK antibody linearity test						pS133-CREB_peptide antibody linearity test
	previously published in (Gavagan et al., 2020)						1:4 dilution of endpoint was highest point, then 1:2 serial dilutions						1:2 serial dilutions of pS133-CREB_pep endpoint (50nM pS133-CREB_pep)
	Highest point from our assay: 3uM primed Bcat, 20nM GSK, 500nM Axin 1:5 dilution						2022-09-30						2022-10-15
	Loaded serial 0.5x dilutions
	2020-03-15
			Fluorescence					[pS9-GSK] (nM)	Fluorescence					[pS133-CREB_pep] (uM)	Fluorescence
	Replicate 1	0.015625	30411					12.5	6357936					50	4534688
		0.03125	82226					6.25	3573559					25	2629981
		0.0625	216927					3.125	1890907					12.5	1385199
		0.125	416635					1.5625	956035					6.25	711768
		0.25	1193013					0.78125	490763					3.125	337550
		0.5	2230950					0.390625	250603					1.5625	175515
		1	4223521					0.195312	129908					0.78125	94593
	Replicate 2	0.015625	28672					0.0976562	55285					0.390625	50149
		0.03125	72792					0.0488281	31805					0.195312	29244
		0.0625	215996					0.0244141	16114					0.0976562	18859
		0.125	562101					0.012207	8341					0.0488281	12397
		0.25	1017042					0.00610352	2755					0.0244141	10579
		0.5	1826855					0.00305176	5021					0.012207	8890
		1	3767770				loaded 1x SDS dye	0	328					0.00610352	4440

## Sheet: Figure 2-figure supplement 3
	Vary ATP
	Figure 2-figure supplement 3A
	vary ATP, GSK_dx and primed Bcat, primed Bcat phosphorylation
	Experiment: varied ATP, 10nM GSK_dx, 50nM primed Bcat, +/- 500nM Axin_FL
	2022-09-02
		no Axin	with Axin
	[ATP] (uM)	rate (uM/min)	rate (uM/min)
	0.2	0.000907
	1	0.00247	0.0122
	5	0.0132
	20	0.0192	0.0372
	50	0.0247
	100	0.0253	0.0444
	500	0.0258
	1000	0.0247	0.0496
	Figure 2-figure supplement 3B
	vary ATP, PKA and GSK_dx, GSK phosphorylation
	Experiment: varied ATP, 20nM PKA, 20nM GSK_dx, +/- 500nM Axin_FL
	2022-10-25
		no Axin	with Axin_FL
	[ATP] (uM)	rate (uM/min)	rate (uM/min)
	0.2	2.07e-05	2.96e-06
	1	0.000183	2.94e-05
	5	0.000605	7.49e-05
	20	0.000724	8.84e-05
	50	0.000824	0.000116
	100	0.000858	0.000116
	Figure 2-figure supplement 3C
	vary ATP, PKA and CREB_pep, CREB phosphorylation
	Experiment: varied ATP, 20nM PKA, 20nM CREB_pep, +/- 500nM Axin_FL
	2022-10-13
		no Axin	with Axin_FL
	[ATP] (uM)	rate (uM/min)	rate (uM/min)
	0.2	0.000234
	1	0.000867	0.00125
	5	0.00237
	20	0.0026	0.00342
	50	0.00292
	100	0.00311	0.00379

## Sheet: Figure 2-figure supplement 4&5
		unphosphorylated GSK3β reaction with pS45-β-catenin in the presence and absence of Axin
		5/31/22 experiment, MG
		varied pS45-Bcat, 10nM unphosphorylated GSK, 100uM ATP, +/- 500nM Axin_FL
		Figure 2-figure supplement 5A
		Replicate 1								Replicate 2								Replicate 3
		no Axin								no Axin								no Axin
		time (min)	20nM	100nM	250nM	500nM	1uM	2uM		time (min)	20nM	100nM	250nM	500nM	1uM	2uM		time (min)	20nM	100nM	250nM	500nM	1uM	2uM
		0.166667	0.000819432	0.00337656	0.0241473	0.0421566	0.0970893	0.154793		0.166667	0.000306771	0.00224692	0.0209994	0.0333593	0.0706872	0.126788		0.166667	0.000360069	0.00316015	0.0248897	0.0314925	0.0665165	0.11448
		0.5	0.000382956	0.0079175	0.053932	0.106009	0.153929	0.207811		0.5	0.000556101	0.0076274	0.056137	0.0821088	0.138496	0.214463		0.5	6.71891e-05	0.00988782	0.055054	0.0706162	0.12638	0.195371
		1	0.00102966	0.0241945	0.0942914	0.163097	0.209048	0.279367		1	0.00098396	0.0244781	0.0923694	0.130106	0.18562	0.257372		1	0.000683482	0.0269624	0.095087	0.116191	0.187538	0.234537
		1.5	0.00138191	0.0386955	0.136294	0.218862	0.287542	0.337949		1.5	0.00166525	0.0367891	0.123578	0.172292	0.258483	0.338122		1.5	0.00111743	0.0397253	0.128485	0.158901	0.231457	0.302967
		Figure 2-figure supplement 5B
		Replicate 1								Replicate 2								Replicate 1
		with Axin_FL								with Axin_FL								with Axin_FL
		time (min)	20nM	100nM	250nM	500nM	1uM	2uM		time (min)	20nM	100nM	250nM	500nM	1uM	2uM		time (min)	20nM	100nM	250nM	500nM	1uM	2uM
		0.166667	0.00113732	0.0158504	0.0458557	0.0660624	0.120291	0.147336		0.166667	0.00140158	0.0139625	0.038871	0.0759421	0.113687	0.157401		0.166667	0.00148524	0.0188511	0.0567505	0.0789223	0.0987668	0.121161
		0.5	0.00585629	0.0536987	0.117092	0.169122	0.219941	0.2401		0.5	0.00558726	0.0473757	0.110052	0.17938	0.221444	0.265492		0.5	0.00645181	0.0578156	0.13694	0.161801	0.189469	0.221922
		1	0.0127646	0.0955347	0.178181	0.218183	0.307189	0.317313		1	0.00972011	0.0807072	0.0970412	0.225343	0.303886	0.320857		1	0.0152092	0.0962881	0.206734	0.236645	0.273391	0.300255
		1.5	0.0148831	0.12263	0.191628	0.300354	0.370852			1.5	0.0141064	0.10699	0.218669	0.301711	0.347592			1.5	0.0204445	0.131107	0.245515	0.280854	0.309126	0.354268

## Sheet: Figure 2-figure supplement 6&7
		pS9-GSK3β reaction with pS45-β-catenin in the presence and absence of Axin
		5/25/22 experiment, MG
		varied pS45-Bcat, 10nM pS9-GSK, 100uM ATP, +/- 500nM Axin_FL
		Figure 2-figure supplement 7A
		Replicate 1								Replicate 2								Replicate 3
		no Axin								no Axin								no Axin
		time (min)	20nM	100nM	250nM	500nM	1uM	2uM		time (min)	20nM	100nM	250nM	500nM	1uM	2uM		time (min)	20nM	100nM	250nM	500nM	1uM	2uM
		1	4.75552e-05	0.00192757	0.0109279	0.029432	0.0734353	0.146497		1	0.000232368	0.00138965	0.0108921	0.025288	0.0397889	0.0964062		1	0.000139708	0.00144529	0.00928663	0.0212926	0.0468263	0.0900744
		2	9.07801e-05	0.00233082	0.0117427	0.0355574	0.0747687	0.157529		2	0.00027873	0.00188762	0.0118822	0.0311894	0.0437179	0.108799		2	0.000160543	0.00159098	0.00682066	0.0195939	0.0501787	0.095286
		5	0.000153182	0.00232394	0.0125777	0.0400712	0.0788117	0.180943		5	0.000281058	0.00336934	0.0130639	0.0323834	0.0475471	0.118646		5	0.000217638	0.00190156	0.0127627	0.021245	0.0515646	0.109886
		10	0.000125499	0.00278697	0.0131501	0.0451988	0.105521	0.219542		10	0.000453379	0.00458694	0.0147432	0.0407634	0.0562021	0.13553		10	0.000208593	0.00324324	0.0119435	0.0271234	0.0650049	0.13941
		Figure 2-figure supplement 7B
		Replicate 1								Replicate 2								Replicate 3
		with Axin_FL								with Axin_FL								with Axin_FL
		time (min)	20nM	100nM	250nM	500nM	1uM	2uM		time (min)	20nM	100nM	250nM	500nM	1uM	2uM		time (min)	20nM	100nM	250nM	500nM	1uM	2uM
		1	0.000620265	0.00194983	0.0198739	0.0365589	0.0850605	0.13233		1	0.0014189	0.0020554	0.0184195	0.042521	0.0800313	0.1252		1	0.000590449	0.00243051	0.0130581	0.0378884	0.0716274	0.126454
		2	0.00073546	0.00514299	0.0339802	0.0675375	0.0978709	0.150034		2	0.000898783	0.00469456	0.0291933	0.0607459	0.0921061	0.141002		2	0.000757247	0.00408724	0.0251853	0.0519069	0.0670676	0.13582
		5	0.0022967	0.0133845	0.0643851	0.095292	0.138887	0.193953		5	0.00263284	0.0126116	0.0529424	0.106318	0.147662	0.194277		5	0.00200479	0.00893792	0.0480908	0.0854599	0.121357	0.186341
		10	0.00462578	0.0249249	0.104865	0.160913	0.199694	0.268803		10	0.004354	0.0277734	0.0997616	0.166054	0.208214	0.244777		10	0.00386451	0.0356311	0.0930317	0.140289	0.180296	0.267328

## Sheet: Figure 2-figure supplement 8
	Vary enzyme
	Figure 2-figure supplement 8A
	2023-05-26	vary GSK_dx +/- Axin_FL, primed Bcat phosphorylation
	Experiment: varied unphosphorylated GSK , 50nM primed Bcat, +/- 500nM Axin_FL, 100uM ATP
	no Axin						no Axin
		Replicate 1	Replicate 2	Replicate 3			average	error
	[GSK_dx] (uM)	Rate (uM/min)	Rate (uM/min)	Rate (uM/min)		[GSK_dx] (uM)	Rate (uM/min)	Rate (uM/min)
	0.002	0.00287	0.00253	0.00331		0.002	0.00290333	0.000391067
	0.005	0.00581	0.00482	0.00747		0.005	0.00603333	0.00133904
	0.01	0.0174	0.0199	0.0116		0.01	0.0163	0.00425793
	with Axin_FL						with Axin_FL
		Replicate 1	Replicate 2	Replicate 3			average	error
	[GSK_dx] (uM)	Rate (uM/min)	Rate (uM/min)	Rate (uM/min)		[GSK_dx] (uM)	Rate (uM/min)	Rate (uM/min)
	0.002	0.0181	0.00913	0.0123		0.002	0.0131767	0.00454881
	0.005	0.0261	0.0307	0.0184		0.005	0.0250667	0.00621477
	0.01	0.0673	0.0502	0.0462		0.01	0.0545667	0.0112073
	Figure 2-figure supplement 8B
	2022-08-29	vary pS9-GSK +/- Axin_FL
	Experiment: varied pS9-GSK, or GSK_S9A), 50nM primed Bcat, +/- 500nM Axin_FL, 100uM ATP
	no Axin						no Axin
		Replicate 1	Replicate 2	Replicate 3			average	error
	[pS9-GSK] (uM)	Rate (uM/min)	Rate (uM/min)	Rate (uM/min)		[pS9-GSK] (uM)	Rate (uM/min)	Rate (uM/min)
	0.002	7.44e-05	8.06e-05	5.92e-05		0.002	7.14e-05	1.10109e-05
	0.005	0.000155	0.000139	0.000107		0.005	0.000133667	2.44404e-05
	0.01	0.000267	0.0002	0.000261		0.01	0.000242667	3.7072e-05
	with Axin_FL						with Axin_FL
		Replicate 1	Replicate 2	Replicate 3			average	error
	[pS9-GSK] (uM)	Rate (uM/min)	Rate (uM/min)	Rate (uM/min)		[pS9-GSK] (uM)	Rate (uM/min)	Rate (uM/min)
	0.002	0.000683	0.000647	0.000796		0.002	0.000708667	7.77453e-05
	0.005	0.00154	0.00141	0.00197		0.005	0.00164	0.000293087
	0.01	0.00308	0.00254	0.00303		0.01	0.00288333	0.000298385
	Figure 2-figure supplement 8C
	2022-08-30	vary GSK_S9A +/- Axin_FL
	Experiment: varied GSK_S9A, 50nM primed Bcat, +/- 500nM Axin_FL, 100uM ATP
	no Axin						no Axin
		Replicate 1	Replicate 2	Replicate 3			average	error
	[GSK_S9A] (uM)	Rate (uM/min)	Rate (uM/min)	Rate (uM/min)		[GSK_S9A] (uM)	Rate (uM/min)	Rate (uM/min)
	0.002	0.00305	0.00238	0.00211		0.002	0.00251333	0.000483977
	0.005	0.00777	0.00611	0.00725		0.005	0.00704333	0.000849078
	0.01	0.0176	0.0148	0.0187		0.01	0.0170333	0.0020108
	with Axin_FL						with Axin_FL
		Replicate 1	Replicate 2	Replicate 3			average	error
	[GSK_S9A] (uM)	Rate (uM/min)	Rate (uM/min)	Rate (uM/min)		[GSK_S9A] (uM)	Rate (uM/min)	Rate (uM/min)
	0.002	0.0115	0.0114	0.0142		0.002	0.0123667	0.0015885
	0.005	0.0255	0.0307	0.0298		0.005	0.0286667	0.00277909
	0.01	0.0578	0.0515	0.0609		0.01	0.0567333	0.00478992
	Figure 2-figure supplement 8D
	2022-10-06	vary PKA, pS9-GSK reaction
	Experiment: varied PKA, 20nM GSK, +/- 500nM Axin_FL, 100uM ATP
	5/26/23, MG : varied PKA, 20nM GSK, +/- 500nM Axin_min, 100uM ATP
	no Axin						no Axin
		Replicate 1	Replicate 2	Replicate 3			Average	Error
	[PKA] (uM)	Rate (uM/min)	Rate (uM/min)	Rate (uM/min)		[PKA] (uM)	Rate (uM/min)	Rate (uM/min)
	0.005	9.87e-05	6.57e-05	0.000122		0.005	9.54667e-05	2.82889e-05
	0.01	0.000144	0.000218	0.000226		0.01	0.000196	4.52106e-05
	0.02	0.00033	0.000367	0.000492		0.02	0.000396333	8.48901e-05
	with Axin_FL						with Axin_FL
		Replicate 1	Replicate 2	Replicate 3			Average	Error
	[PKA] (uM)	Rate (uM/min)	Rate (uM/min)	Rate (uM/min)		[PKA] (uM)	Rate (uM/min)	Rate (uM/min)
	0.005	4.51e-05	2.98e-05	4.59e-05		0.005	4.02667e-05	9.07322e-06
	0.01	6.59e-05	7.77e-05	7.75e-05		0.01	7.37e-05	6.75574e-06
	0.02	9.57e-05	0.000147	0.000138		0.02	0.0001269	2.73922e-05
	with Axin_min						with Axin_min
		Replicate 1	Replicate 2	Replicate 3			Average	Error
	[PKA] (uM)	Rate (uM/min)	Rate (uM/min)	Rate (uM/min)		[PKA] (uM)	Rate (uM/min)	Rate (uM/min)
	0.005	2.18e-05	3.12e-05	2.03e-05		0.005	2.44333e-05	5.9079e-06
	0.01	5.91e-05	4.13e-05	4.42e-05		0.01	4.82e-05	9.55039e-06
	0.02	0.000117	0.000123	9.53e-05		0.02	0.000111767	1.45727e-05
	Figure 2-figure supplement 8E
	2022-10-28	vary PKA, CREB reaction
	Experiment: varied PKA, 20nM CREB_pep, +/- 500nM Axin_FL, 100uM ATP
	no Axin
		Replicate 1	Replicate 2	Replicate 3			Average	Error
	[PKA] (uM)	Rate (uM/min)	Rate (uM/min)	Rate (uM/min)		[PKA] (uM)	Rate (uM/min)	Rate (uM/min)
	0.005	0.00141	0.00129	0.00159		0.005	0.00143	0.000150997
	0.01	0.00267	0.00228	0.00272		0.01	0.00255667	0.000240901
	0.02	0.00444	0.0048	0.0051		0.02	0.00478	0.000330454
	with Axin_FL
		Replicate 1	Replicate 2	Replicate 3			Average	Error
	[PKA] (uM)	Rate (uM/min)	Rate (uM/min)	Rate (uM/min)		[PKA] (uM)	Rate (uM/min)	Rate (uM/min)
	0.005	0.00169	0.00123	0.00156		0.005	0.00149333	0.000237136
	0.01	0.00287	0.00282	0.00228		0.01	0.00265667	0.000327159
	0.02	0.00525	0.00444	0.00492		0.02	0.00487	0.000407308

## Sheet: Figure 2-figure supplement 9
		Recombinant GSK3b is phosphorylated on multiple sites (GSK_S9A vs phosphatase-treated GSK_S9A phosphorylation of pS45-Bcat)
		Figure 2-figure supplement 9B
		11/19/22 experiment MG
		varied pS45-Bcat, 10nM GSK_S9A or phosphatase treated GSK_S9A, 100uM ATP
			GSK_S9A	GSK_S9A, phosphatase treated
		[pS45-Bcat] (uM)	Rate (uM/min)	Rate (uM/min)
		0.02	0.000273	0.00143
		0.1	0.00425	0.0334
		0.25	0.0145	0.089
		0.5	0.0214	0.123
		1	0.0255	0.146
		2	0.0275	0.1601

## Sheet: Figure 3-figure supplement 1
	vary Axin_FL
	Figure 3-figure supplement 1A
	vary Axin_FL, unphosphorylated GSK phosphorylation of pS45-Bcat
	Experiment: varied Axin_FL, 10nM unphosphorylated GSK, 50nM primed Bcat, 100uM ATP
	2022-09-02
		Replicate 1	Replicate 2	Replicate 3			Average	Error
	[Axin_FL] (uM)	Rate (uM/min)	Rate (uM/min)	Rate (uM/min)		[Axin_FL] (uM)	Rate (uM/min)	Rate (uM/min)
	0	0.0187	0.0206	0.0161		0	0.0184667	0.00225906
	0.005	0.00913	0.00957	0.0189		0.005	0.0125333	0.00551808
	0.02	0.011	0.00866	0.0108		0.02	0.0101533	0.00129713
	0.1	0.0188	0.0287	0.0269		0.1	0.0248	0.00527352
	0.5	0.0364	0.0369	0.039		0.5	0.0374333	0.00137961
	2	0.0127	0.0142	0.0172		2	0.0147	0.00229129
	Figure 3-figure supplement 1B
	vary Axin_FL, pS9-GSK phosphorylation of pS45-Bcat
	Experiment: varied Axin_FL, 10nM pS9-GSK, 50nM primed Bcat, 100uM ATP
	2022-09-02
		Replicate 1	Replicate 2	Replicate 3			Average	Error
	[Axin_FL] (uM)	Rate (uM/min)	Rate (uM/min)	Rate (uM/min)		[Axin_FL] (uM)	Rate (uM/min)	Rate (uM/min)
	0	7.3e-05	4.08e-05	0.000113		0	7.56e-05	3.62e-05
	0.005	0.000106	9.67e-05	0.000215		0.005	0.000139	6.58e-05
	0.02	0.00023	0.000286	0.000269		0.02	0.000262	2.87e-05
	0.1	0.000595	0.00038	0.000562		0.1	0.000512	0.000116
	0.5	0.000386	0.000474	0.000626		0.5	0.000495	0.000121
	2	3.25e-05	9.67e-05	0.000153		2	9.41e-05	6.03e-05
	Figure 3-figure supplement 1C
	vary Axin_FL, PKA phosphorylation oif GSK
	Experiment: varied Axin_FL, 20nM PKA, 20nM GSK_dx, 100uM ATP
	2022-10-04
		Replicate 1	Replicate 2	Replicate 3			Average	Error
	[Axin_FL] (uM)	Rate (uM/min)	Rate (uM/min)	Rate (uM/min)		[Axin_FL] (uM)	Rate (uM/min)	Rate (uM/min)
	0	0.00064	0.000472	0.000702		0	0.000604667	0.000119001
	0.005	0.000574	0.000417	0.000548		0.005	0.000513	8.41487e-05
	0.02	0.000414	0.000366	0.000545		0.02	0.000441667	9.26517e-05
	0.1	0.000262	0.000218	0.000322		0.1	0.000267333	5.22047e-05
	0.5	0.000132	0.000177	0.000225		0.5	0.000178	4.65081e-05
	2	0.000141	0.000215	0.000196		2	0.000184	3.84318e-05

## Sheet: Figure 4-figure supplement 1&2
		PKA reaction with GSK3β in the presence and absence of Axin_FL
		5/18/22 experiment, MG
		varied GSK, 20nM PKA, 100uM ATP, +/- 500nM Axin_FL
		Figure 4-figure supplement 2A
		Replicate 1								Replicate 2								Replicate 3
		no Axin								no Axin								no Axin
		time (min)	5nM	20nM	50nM	100nM	500nM	1uM		time (min)	5nM	20nM	50nM	100nM	500nM	1uM		time (min)	5nM	20nM	50nM	100nM	500nM	1uM
		0.5	0.00436071	0.0126737	0.0154508	0.0126782	0.0156741	0.0168473		0.5	0.00306707	0.00975857	0.0140739	0.00939303	0.0139575	0.0166391		0.5	0.00228517	0.00939238	0.0136512	0.0100692	0.014627	0.0231941
		1	0.00540091	0.0158233	0.0191875	0.0175113	0.0203156	0.0227544		1	0.00320268	0.0132083	0.0182967	0.0137791	0.0162997	0.0234877		1	0.00260626	0.0133973	0.0179884	0.0154743	0.019327	0.0282375
		2	0.00670653	0.0186125	0.0249311	0.0223655	0.0288399	0.0320556		2	0.00378655	0.0167055	0.0236909	0.0208484	0.0238644	0.0331355		2	0.00344019	0.0160255	0.0230335	0.0209868	0.0263094	0.0367131
		4	0.00743057	0.0209921	0.0296693	0.0301668	0.0429007	0.0487343		4	0.00471545	0.0208046	0.0284899	0.029123	0.0408039	0.0516895		4	0.00388234	0.0189414	0.0284592	0.031191	0.045276	0.0574313
		Figure 4-figure supplement 2B
		Replicate 1								Replicate 2								Replicate 3
		with Axin_FL								with Axin_FL								with Axin_FL
		time (min)	5nM	20nM	50nM	100nM	500nM	1uM		time (min)	5nM	20nM	50nM	100nM	500nM	1uM		time (min)	5nM	20nM	50nM	100nM	500nM	1uM
		0.5	0.000125103	0.00027181	0.000542418	0.00157965	0.00646264	0.0110012		0.5	0.000112658	0.000185055	0.00039215	0.000901332	0.00461882	0.00907143		0.5	8.56083e-05	0.000229158	0.000419592	0.00144798	0.00595713	0.0112425
		1	0.000139309	0.000370785	0.00100055	0.0024657	0.00991197	0.0145182		1	0.000133312	0.000326306	0.000712377	0.00162244	0.00670556	0.0125647		1	9.11455e-05	0.000341641	0.000656426	0.00211997	0.00839303	0.012915
		2	0.000351882	0.000816962	0.00176654	0.00429844	0.0139686	0.0210616		2	0.000223905	0.000660324	0.00148994	0.00305906	0.00942633	0.0177902		2	0.00012049	0.000556644	0.00116514	0.00356329	0.0109961	0.0184208
		4	0.000650861	0.00147626	0.00416292	0.00798916	0.0201991	0.031583		4	0.000288533	0.00130165	0.00324591	0.00598595	0.0164759	0.0255646		4	0.000290522	0.00146278	0.002427	0.00604386	0.0182563	0.0264226
