# Supplementary material for: The Axin scaffold protects the kinase GSK3β from cross-pathway inhibition
Source: eLife journal article supplement (doi:10.7554/elife.85444), 2023-08-07

A) Representative western blots for initial rate assays

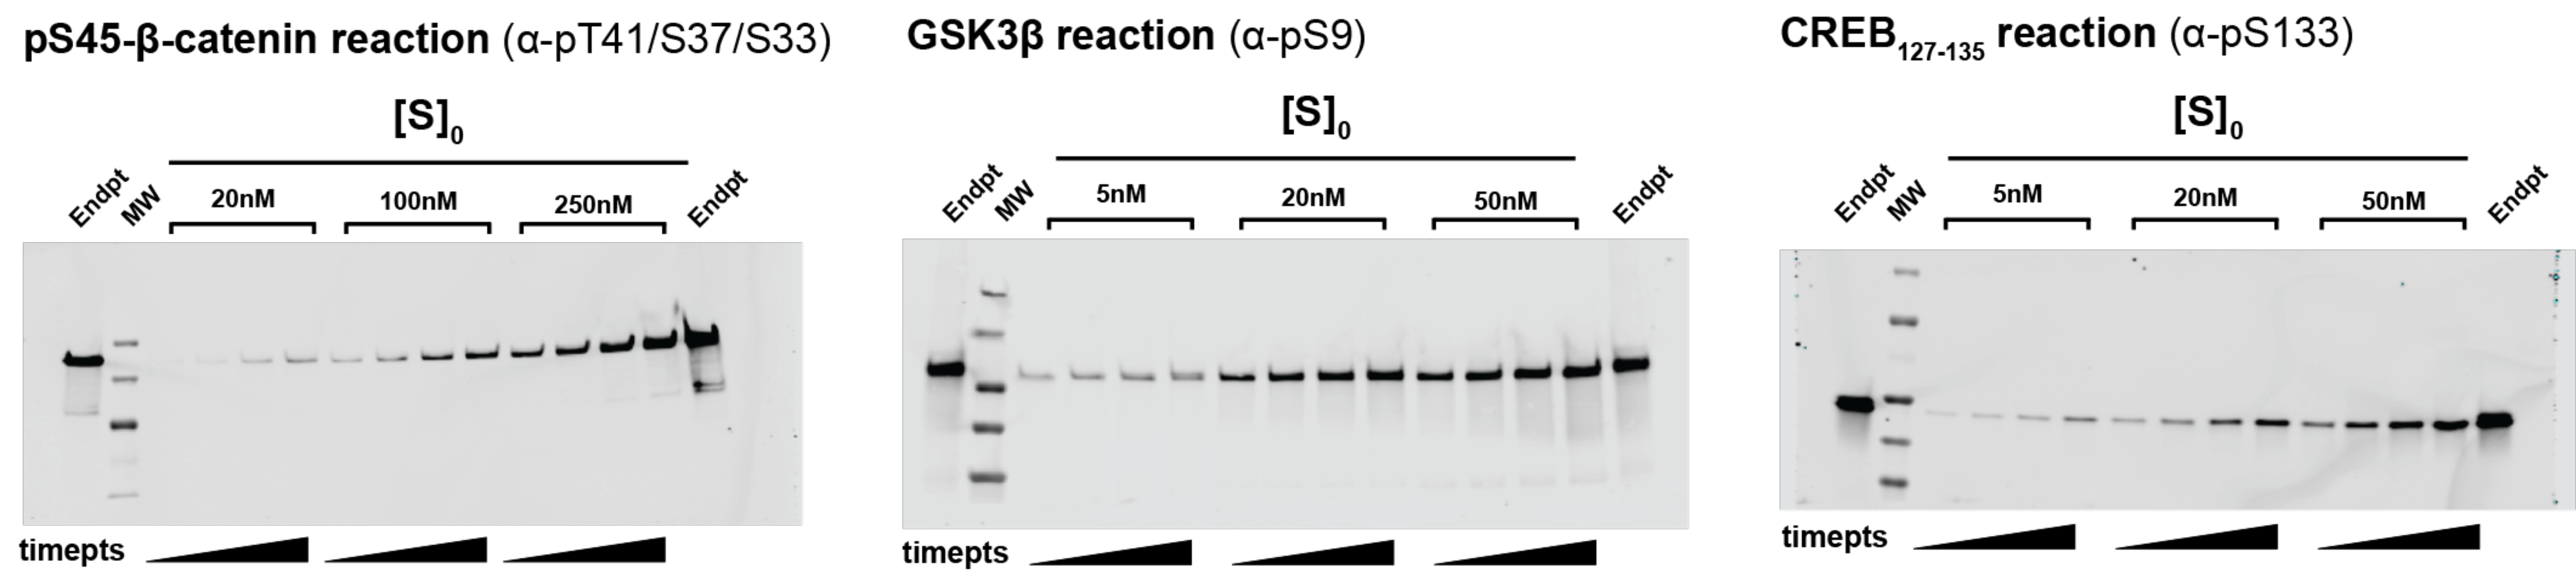

B) Validation of endpoint standards

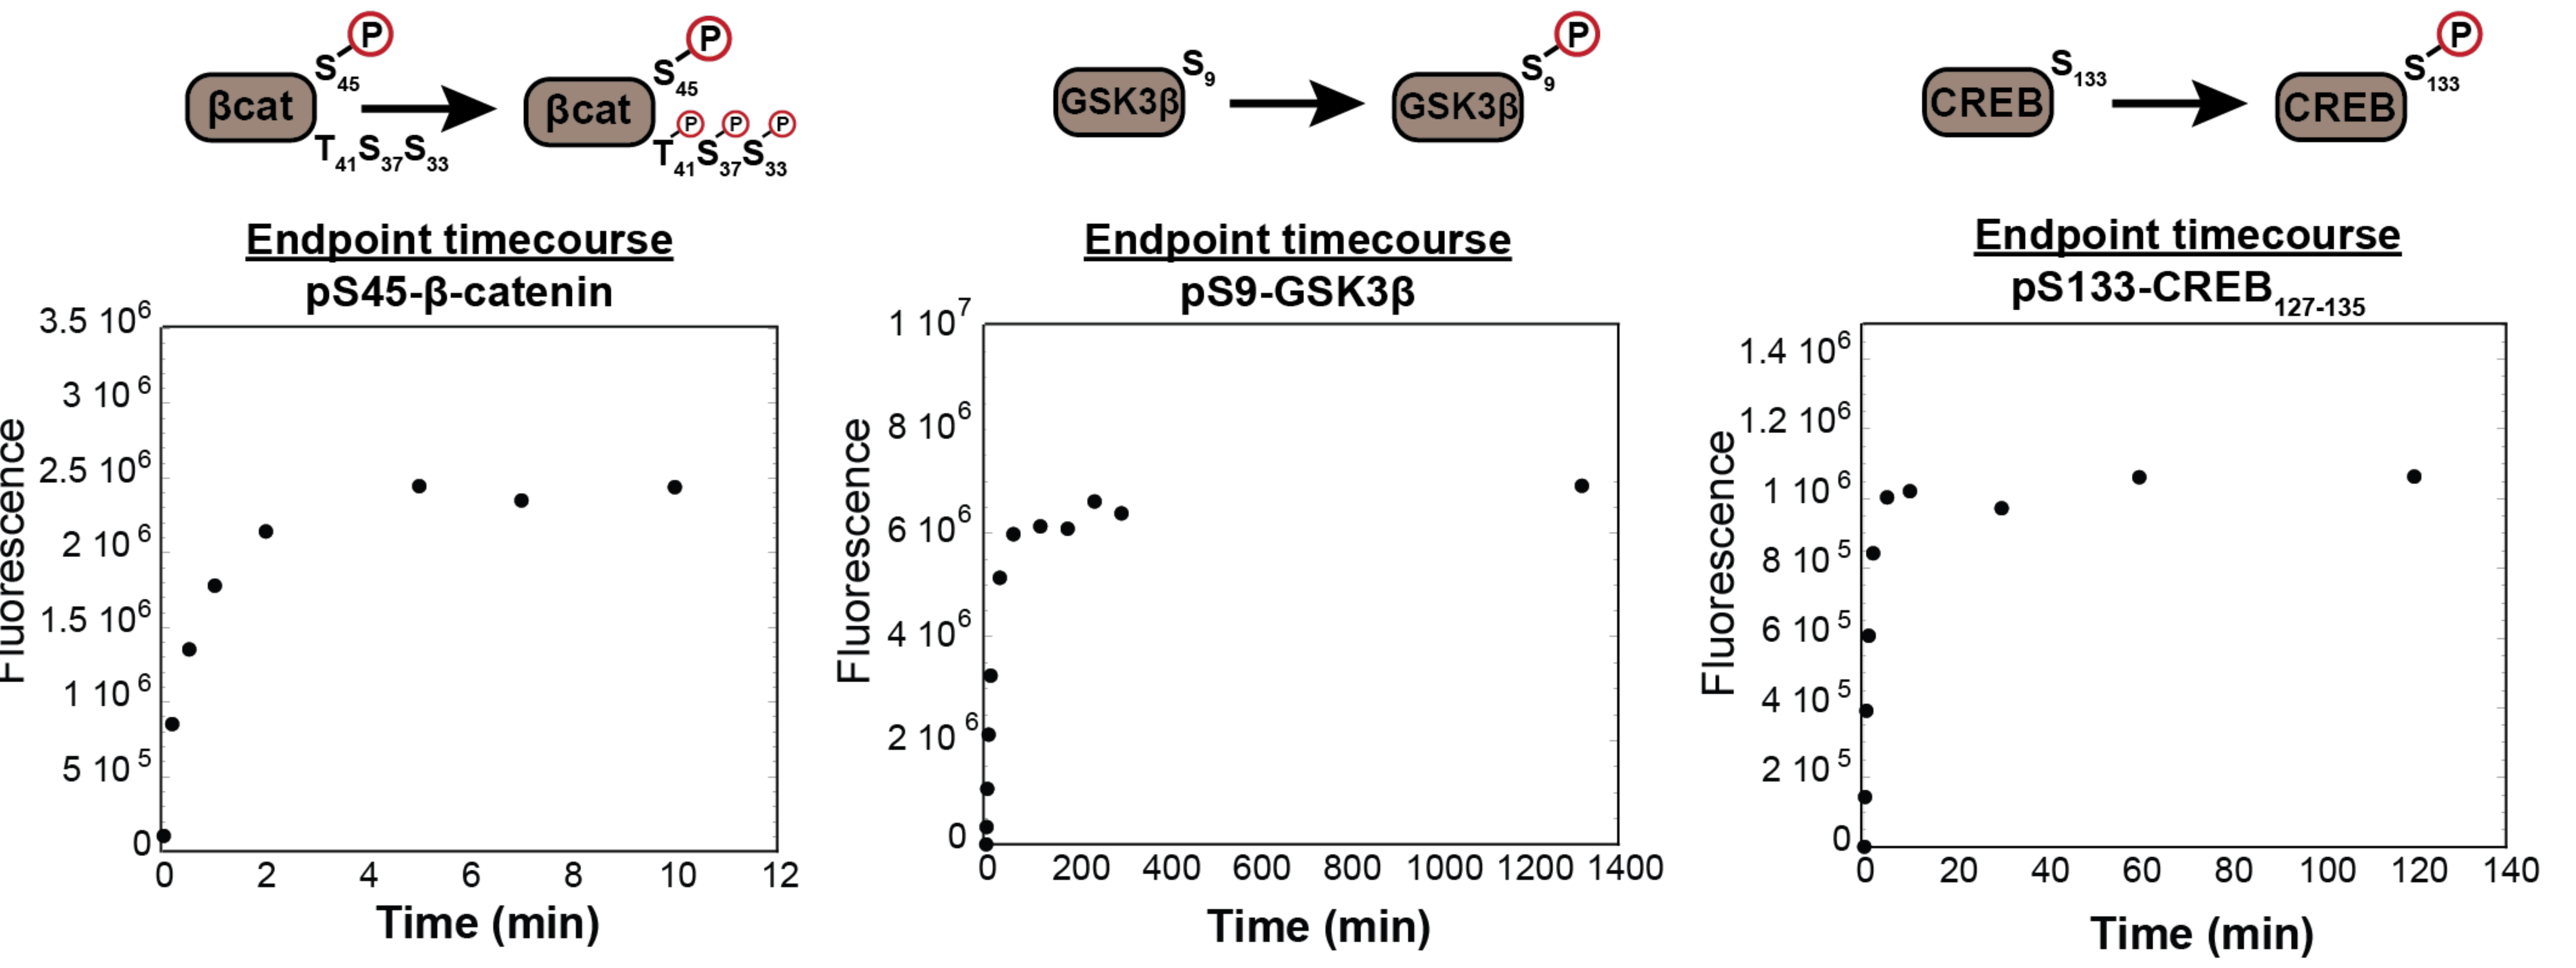

C) Antibody signal is linear

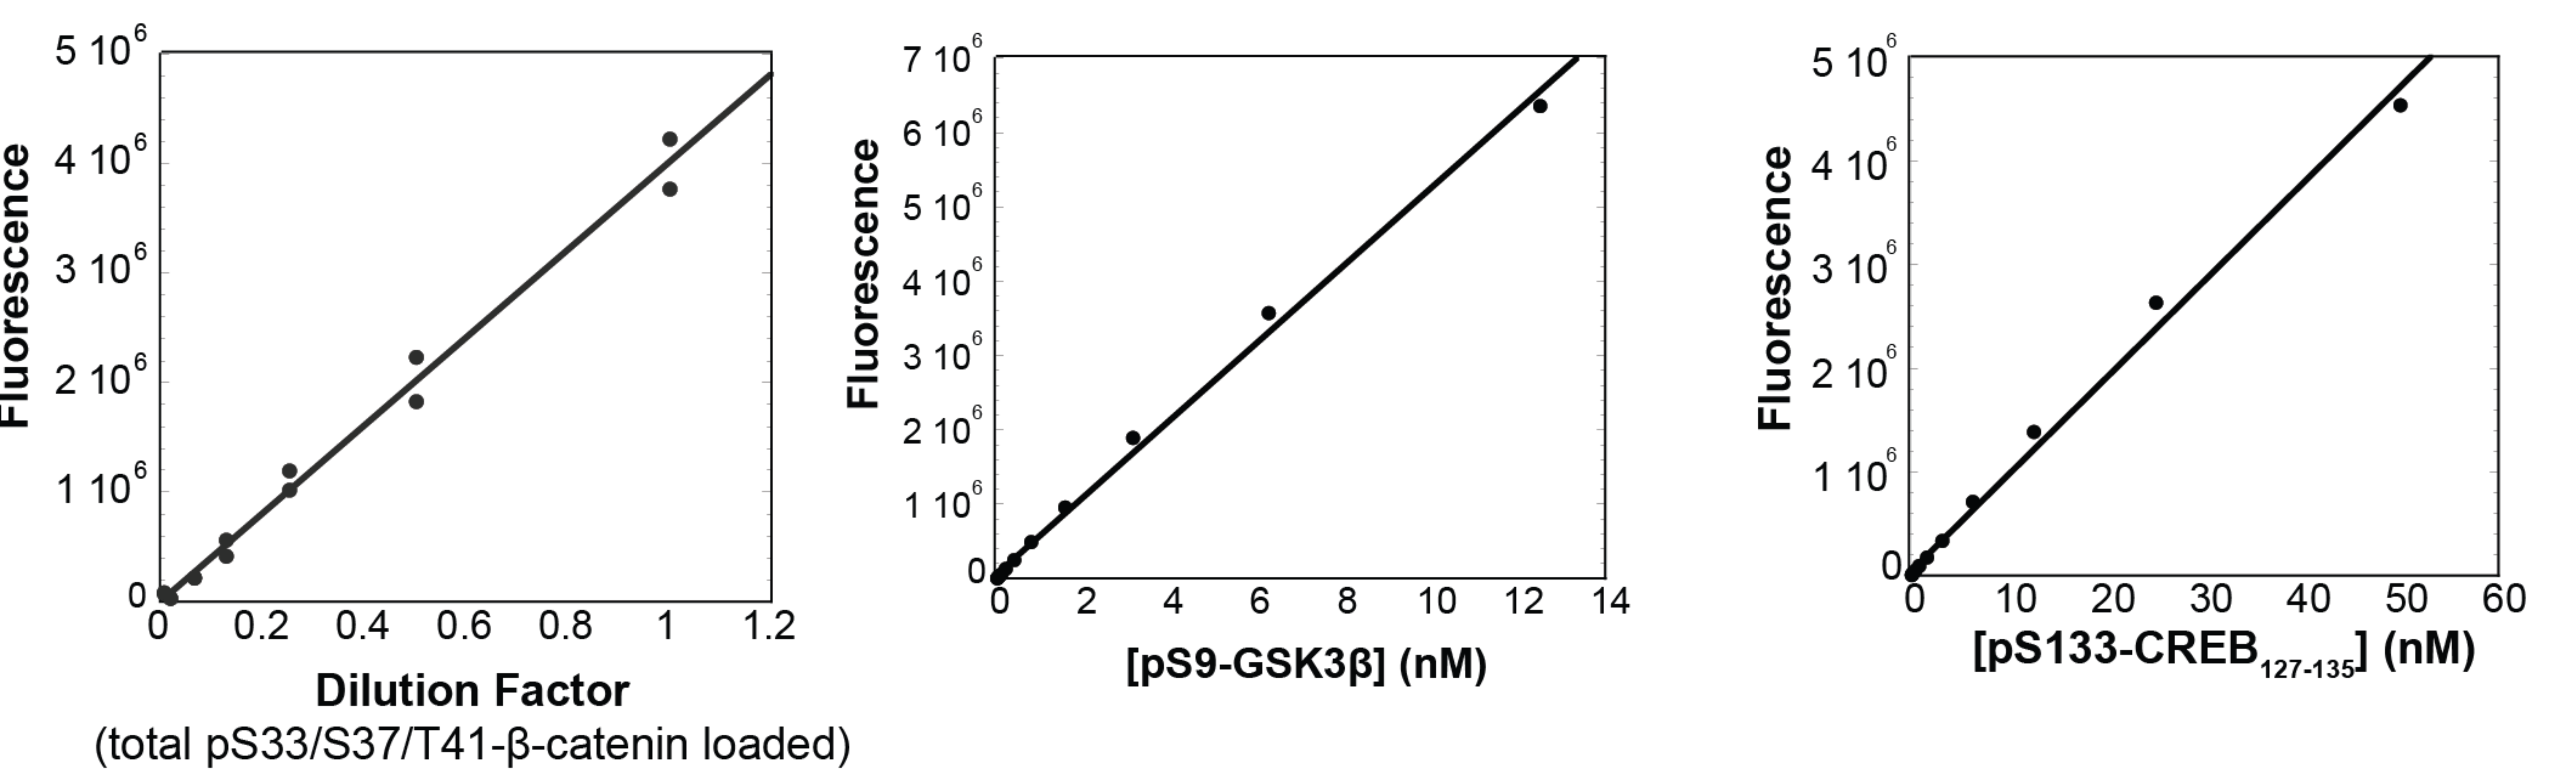

Supplement: supp [file elife-85444-supp-v1.zip]
