# Supplementary material for: The Axin scaffold protects the kinase GSK3β from cross-pathway inhibition
Source: eLife journal article supplement (doi:10.7554/elife.85444), 2023-08-07
Supplement: supp [file elife-85444-supp-v1.zip]

Endpt (50nM)  
MW ladder

rxn rxn rxn  
0.5 1 2 4 0.5 1 2 4 0.5 1 2 4

Endpt (50nM)

### 15-well gel layout

*rxn timepoints: 0.5, 1, 2, 4 minutes*

Replicate 1

Replicate 2

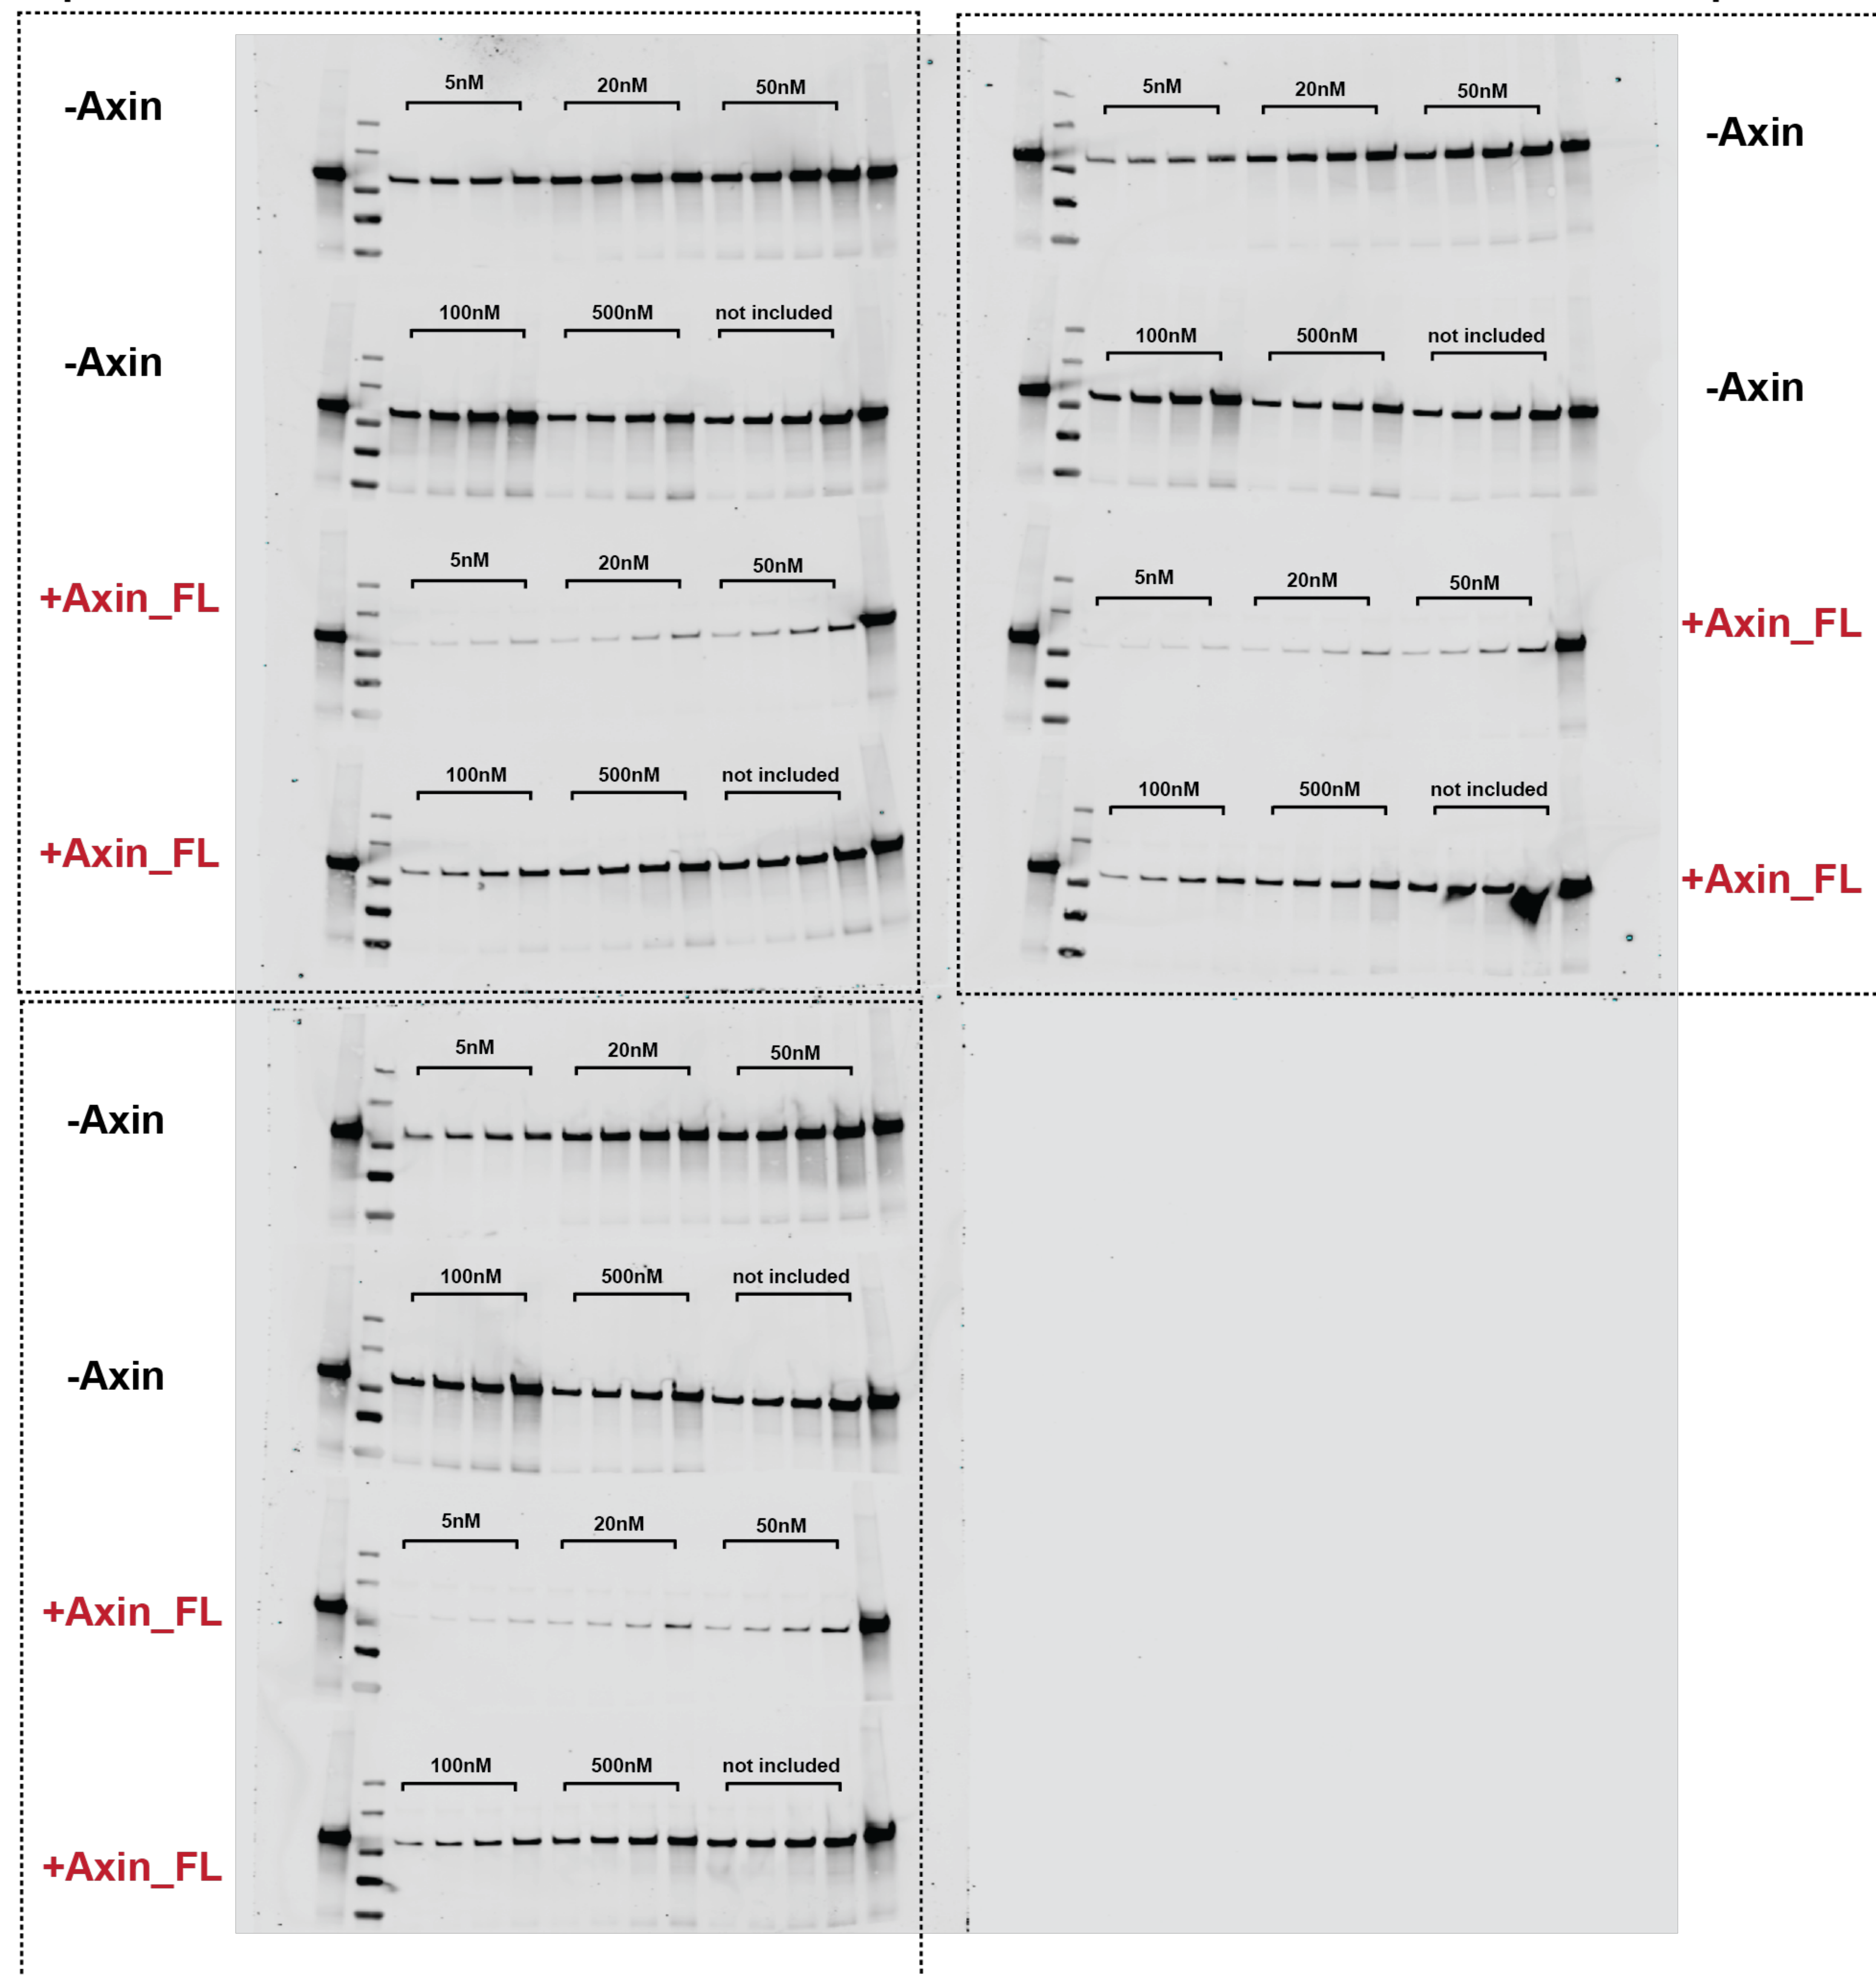

Replicate 3
