# Supplementary material for: The Axin scaffold protects the kinase GSK3β from cross-pathway inhibition
Source: eLife journal article supplement (doi:10.7554/elife.85444), 2023-08-07
Supplement: supp [file elife-85444-supp-v1.zip]

A)

## Phos-tag gel

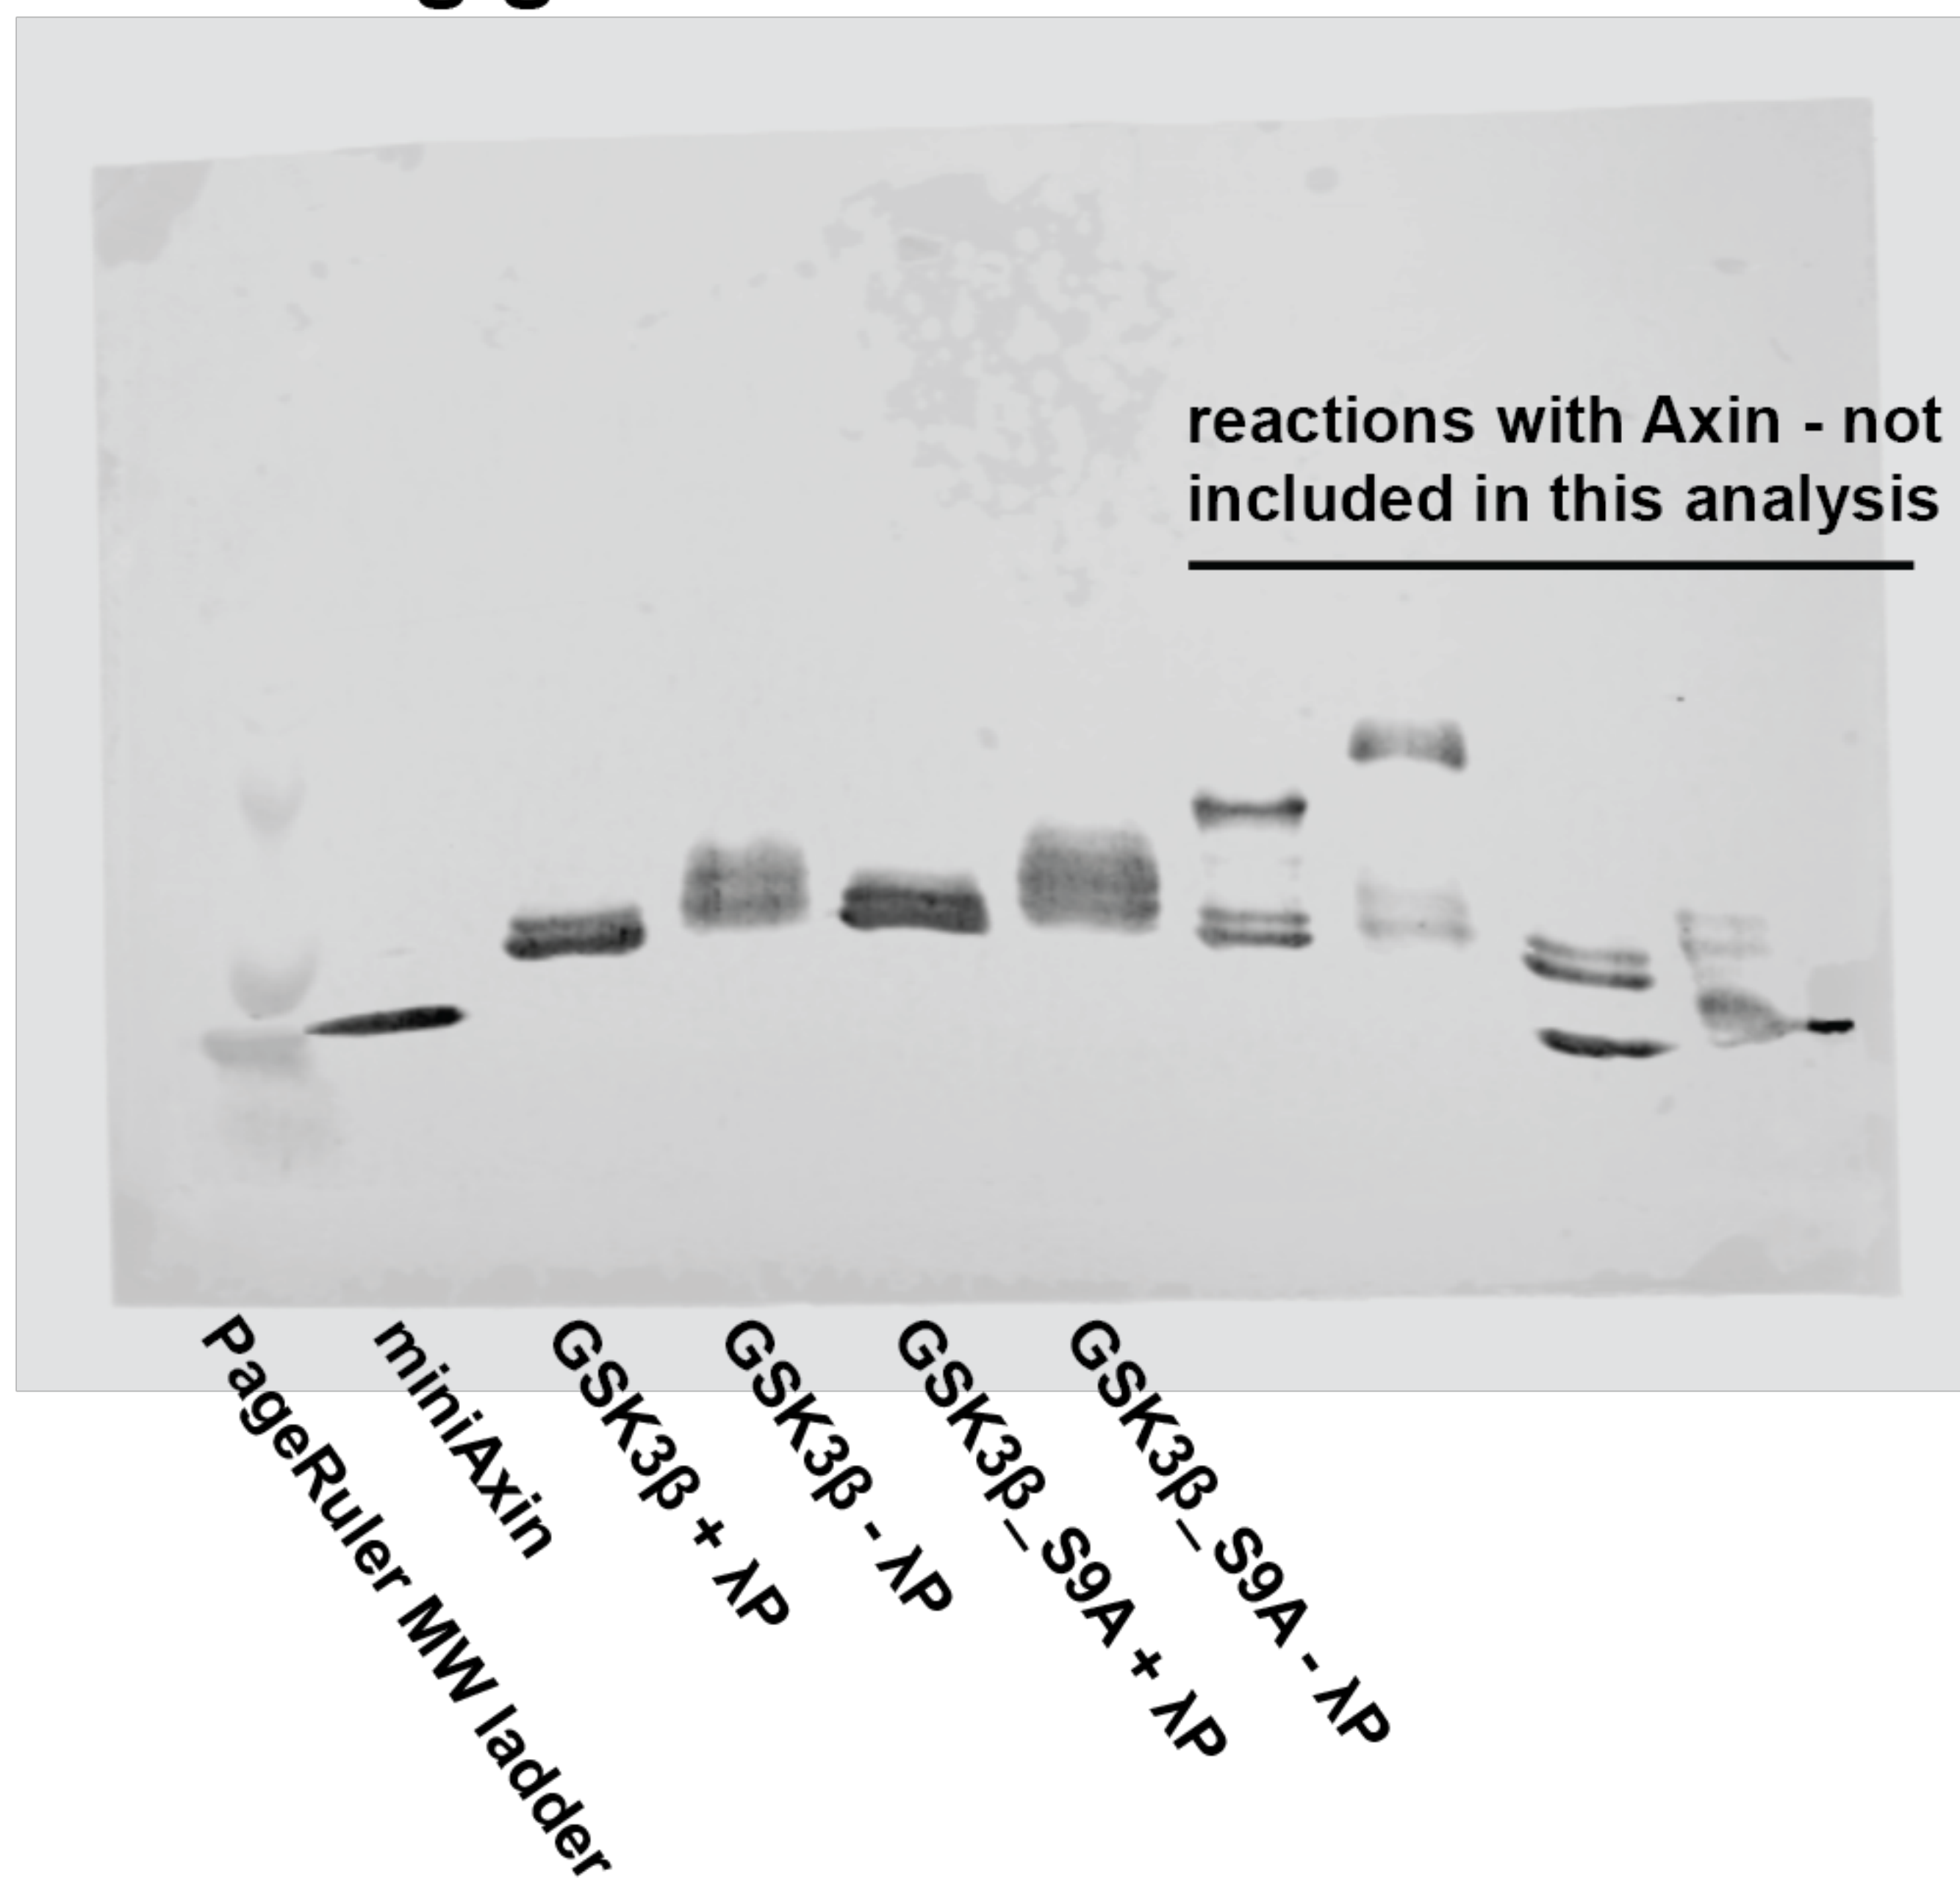

B)

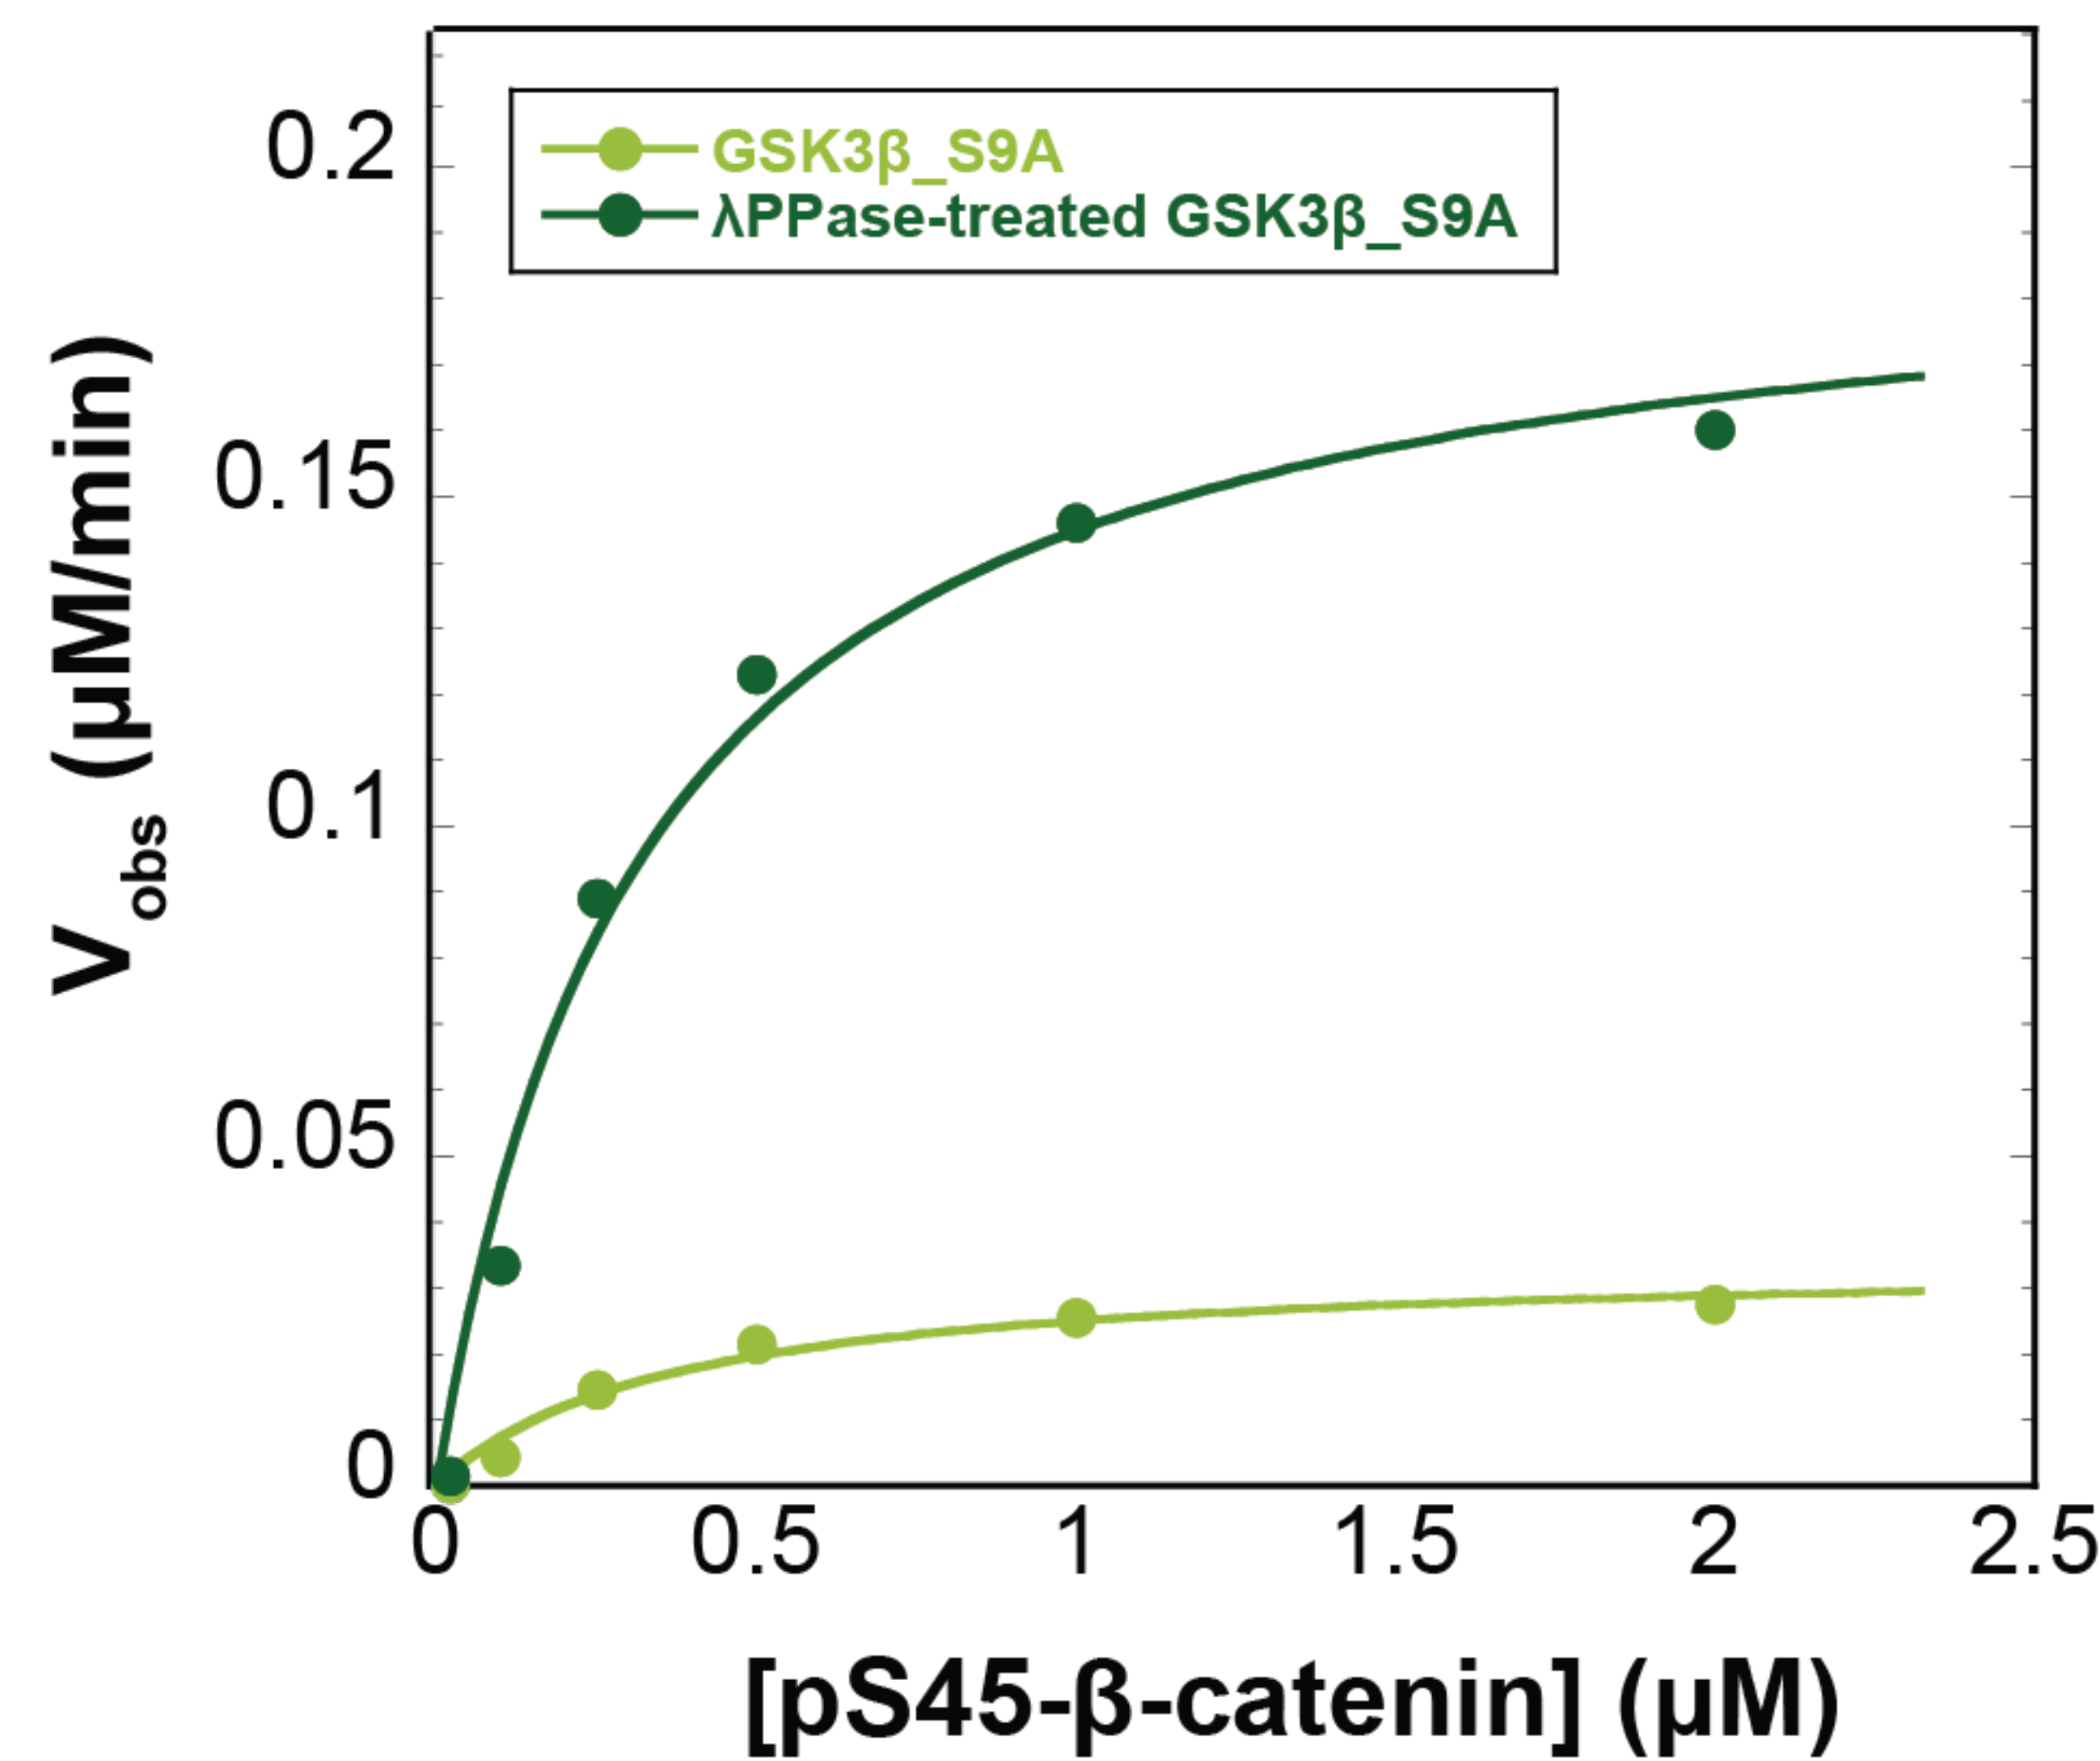

C)

GSK3 $\beta$  phosphorylation state affects kinase activityRecombinantly  
expressed $\lambda$ PPase  
treatedPKA  
treatedFold-change  
in  $k_{\text{cat}}/K_{\text{M}}$ GSK3 $\beta$   
(pY216)  
+ other phosphosites

~5x increase

GSK3 $\beta$   
(pY216)

~200x decrease

pS9-GSK3 $\beta$   
(pY216)

no effect

no effect

~200x increase

GSK3 $\beta$ \_S9A  
(pY216)  
+ other phosphosites

~5x increase

GSK3 $\beta$ \_S9A  
(pY216)

no effect

GSK3 $\beta$ \_S9A  
(pY216)
