# Supplementary material for: The Axin scaffold protects the kinase GSK3β from cross-pathway inhibition
Source: eLife journal article supplement (doi:10.7554/elife.85444), 2023-08-07

**A) Product vs time plots for reactions of pS9-GSK3β with pS45-β-catenin (no Axin)**

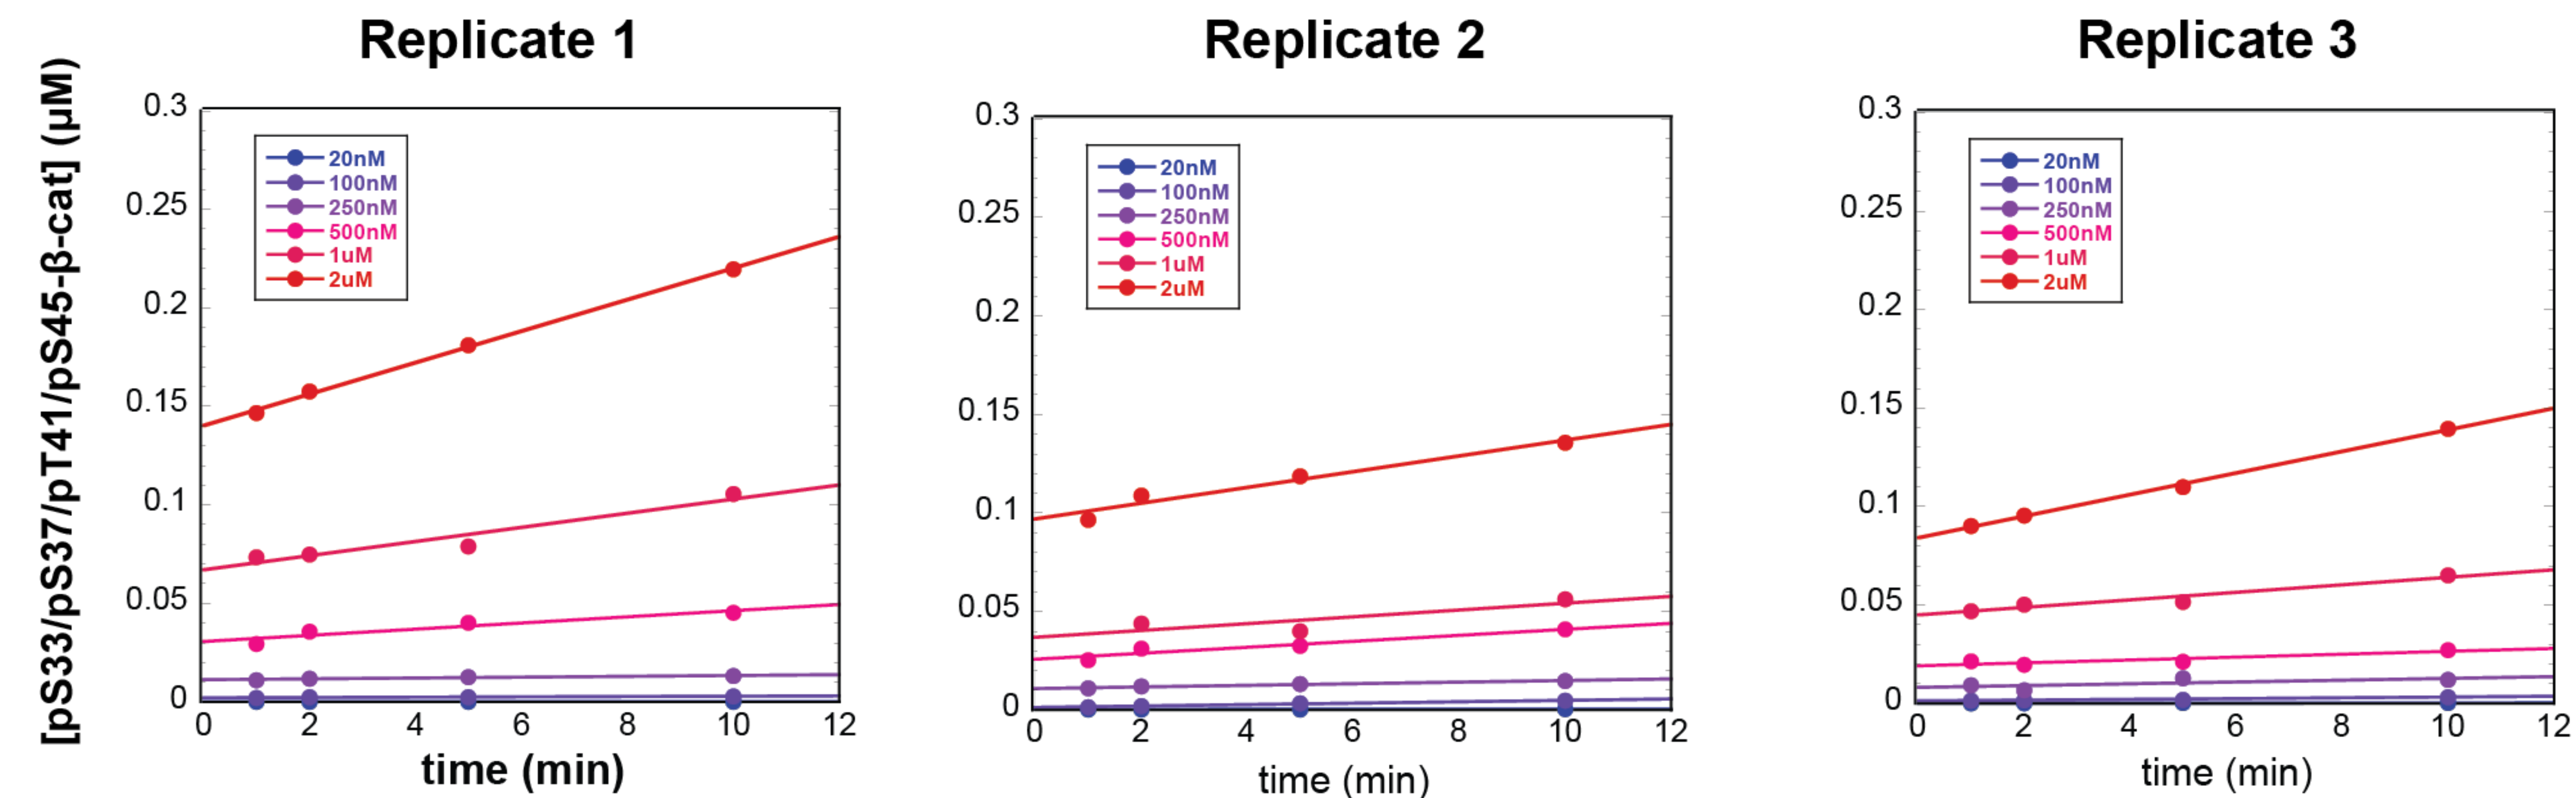

**B) Product vs time plots for reactions of pS9-GSK3β with pS45-β-catenin (with Axin)**

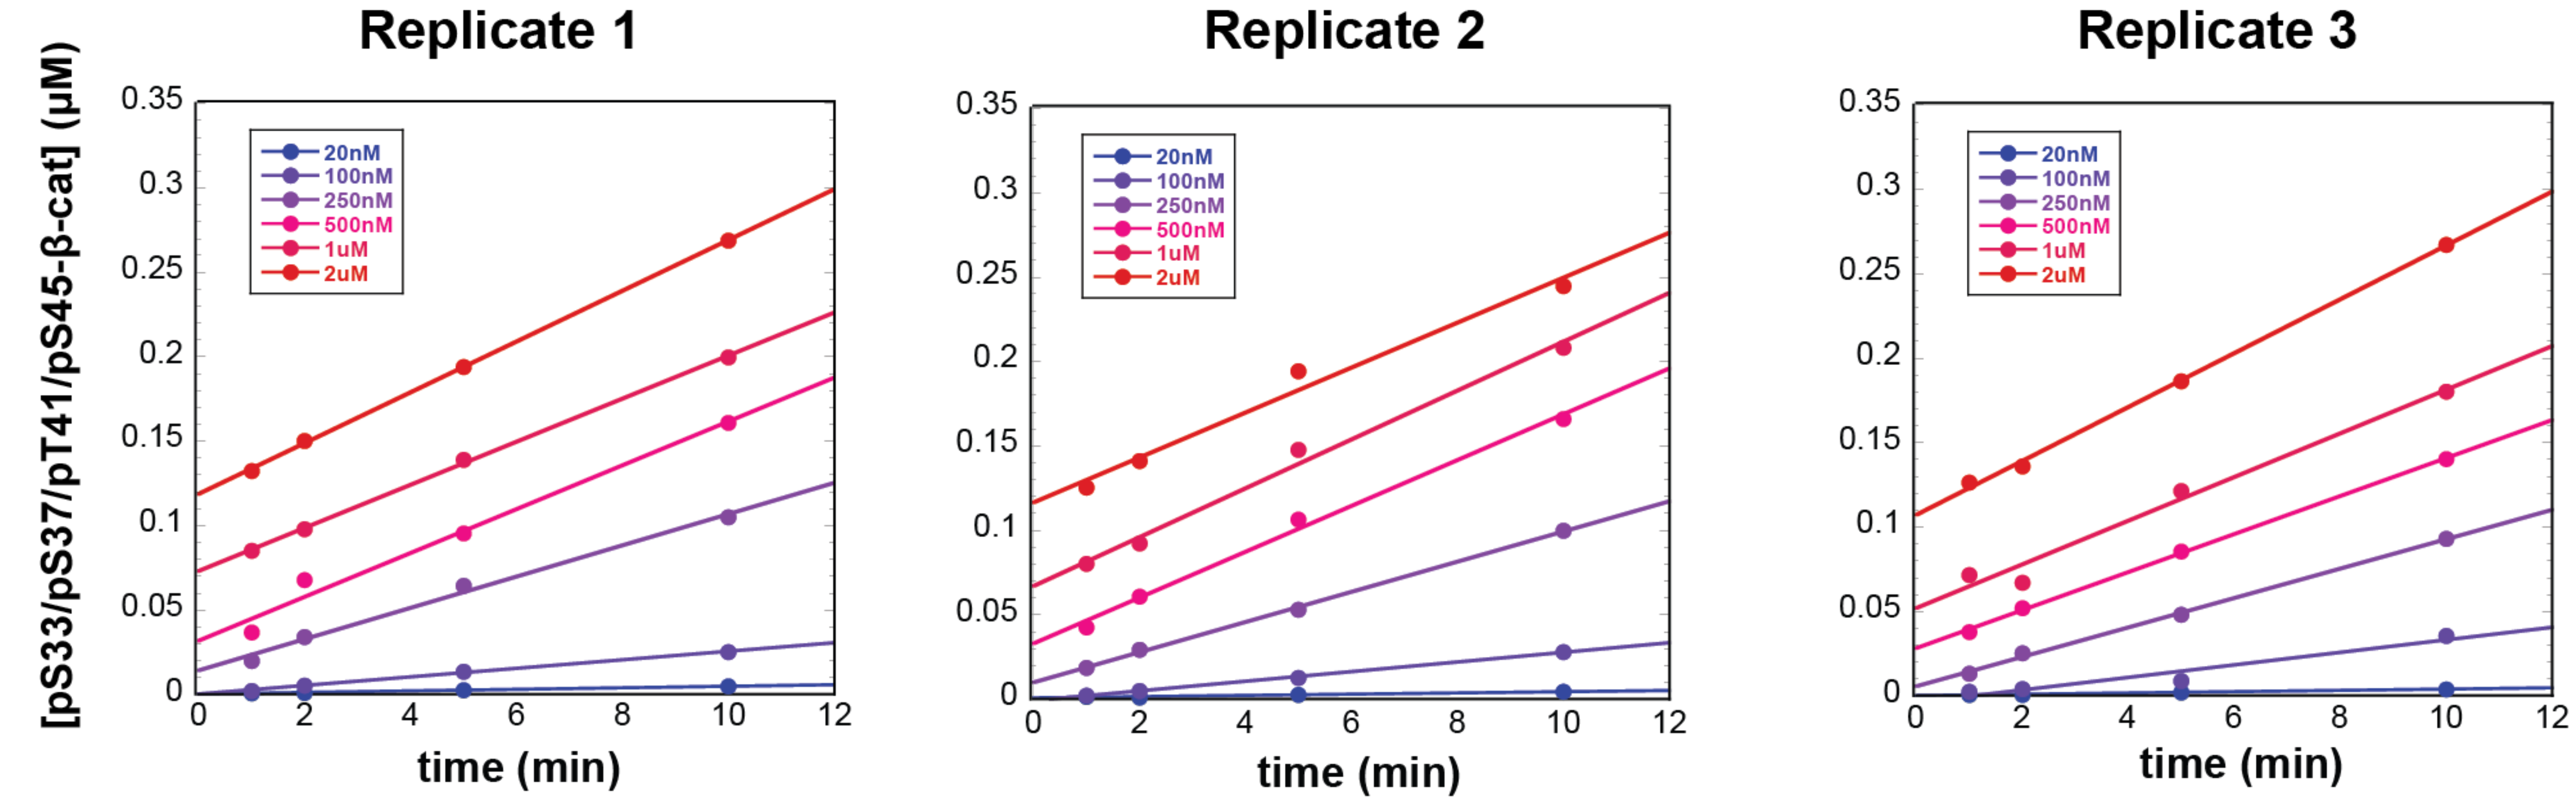

Supplement: supp [file elife-85444-supp-v1.zip]
