# Supplementary material for: The Axin scaffold protects the kinase GSK3β from cross-pathway inhibition
Source: eLife journal article supplement (doi:10.7554/elife.85444), 2023-08-07

**A)** GSK3 $\beta$  phosphorylation  
of pS45- $\beta$ -catenin

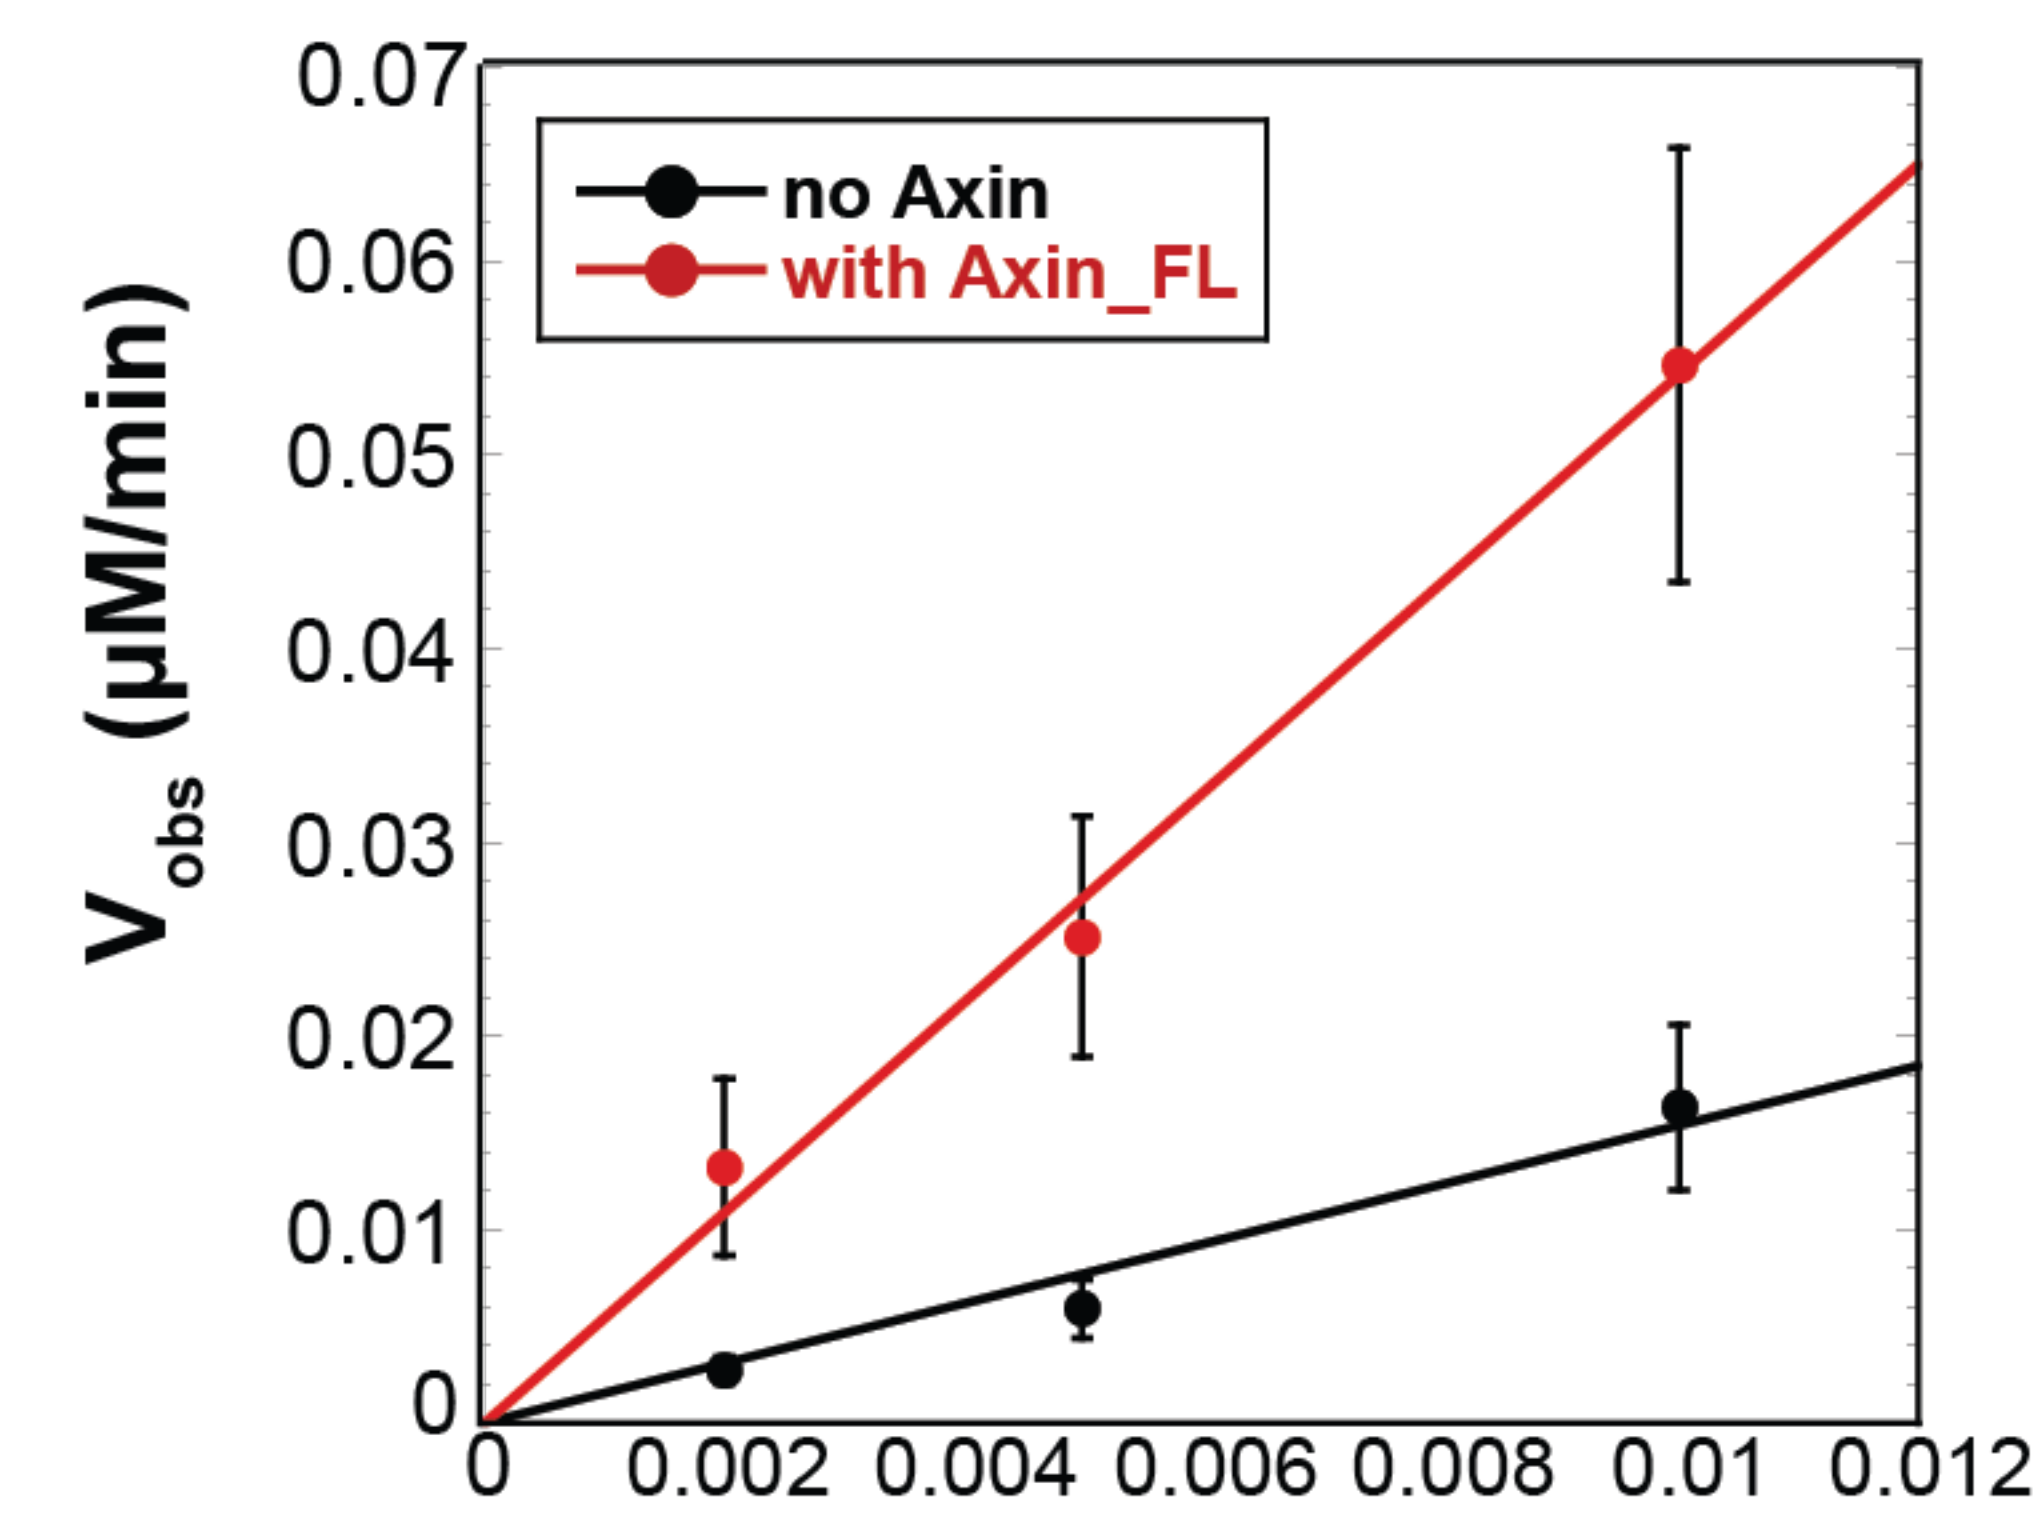

**B)** pS9-GSK3 $\beta$  phosphorylation  
of pS45- $\beta$ -catenin

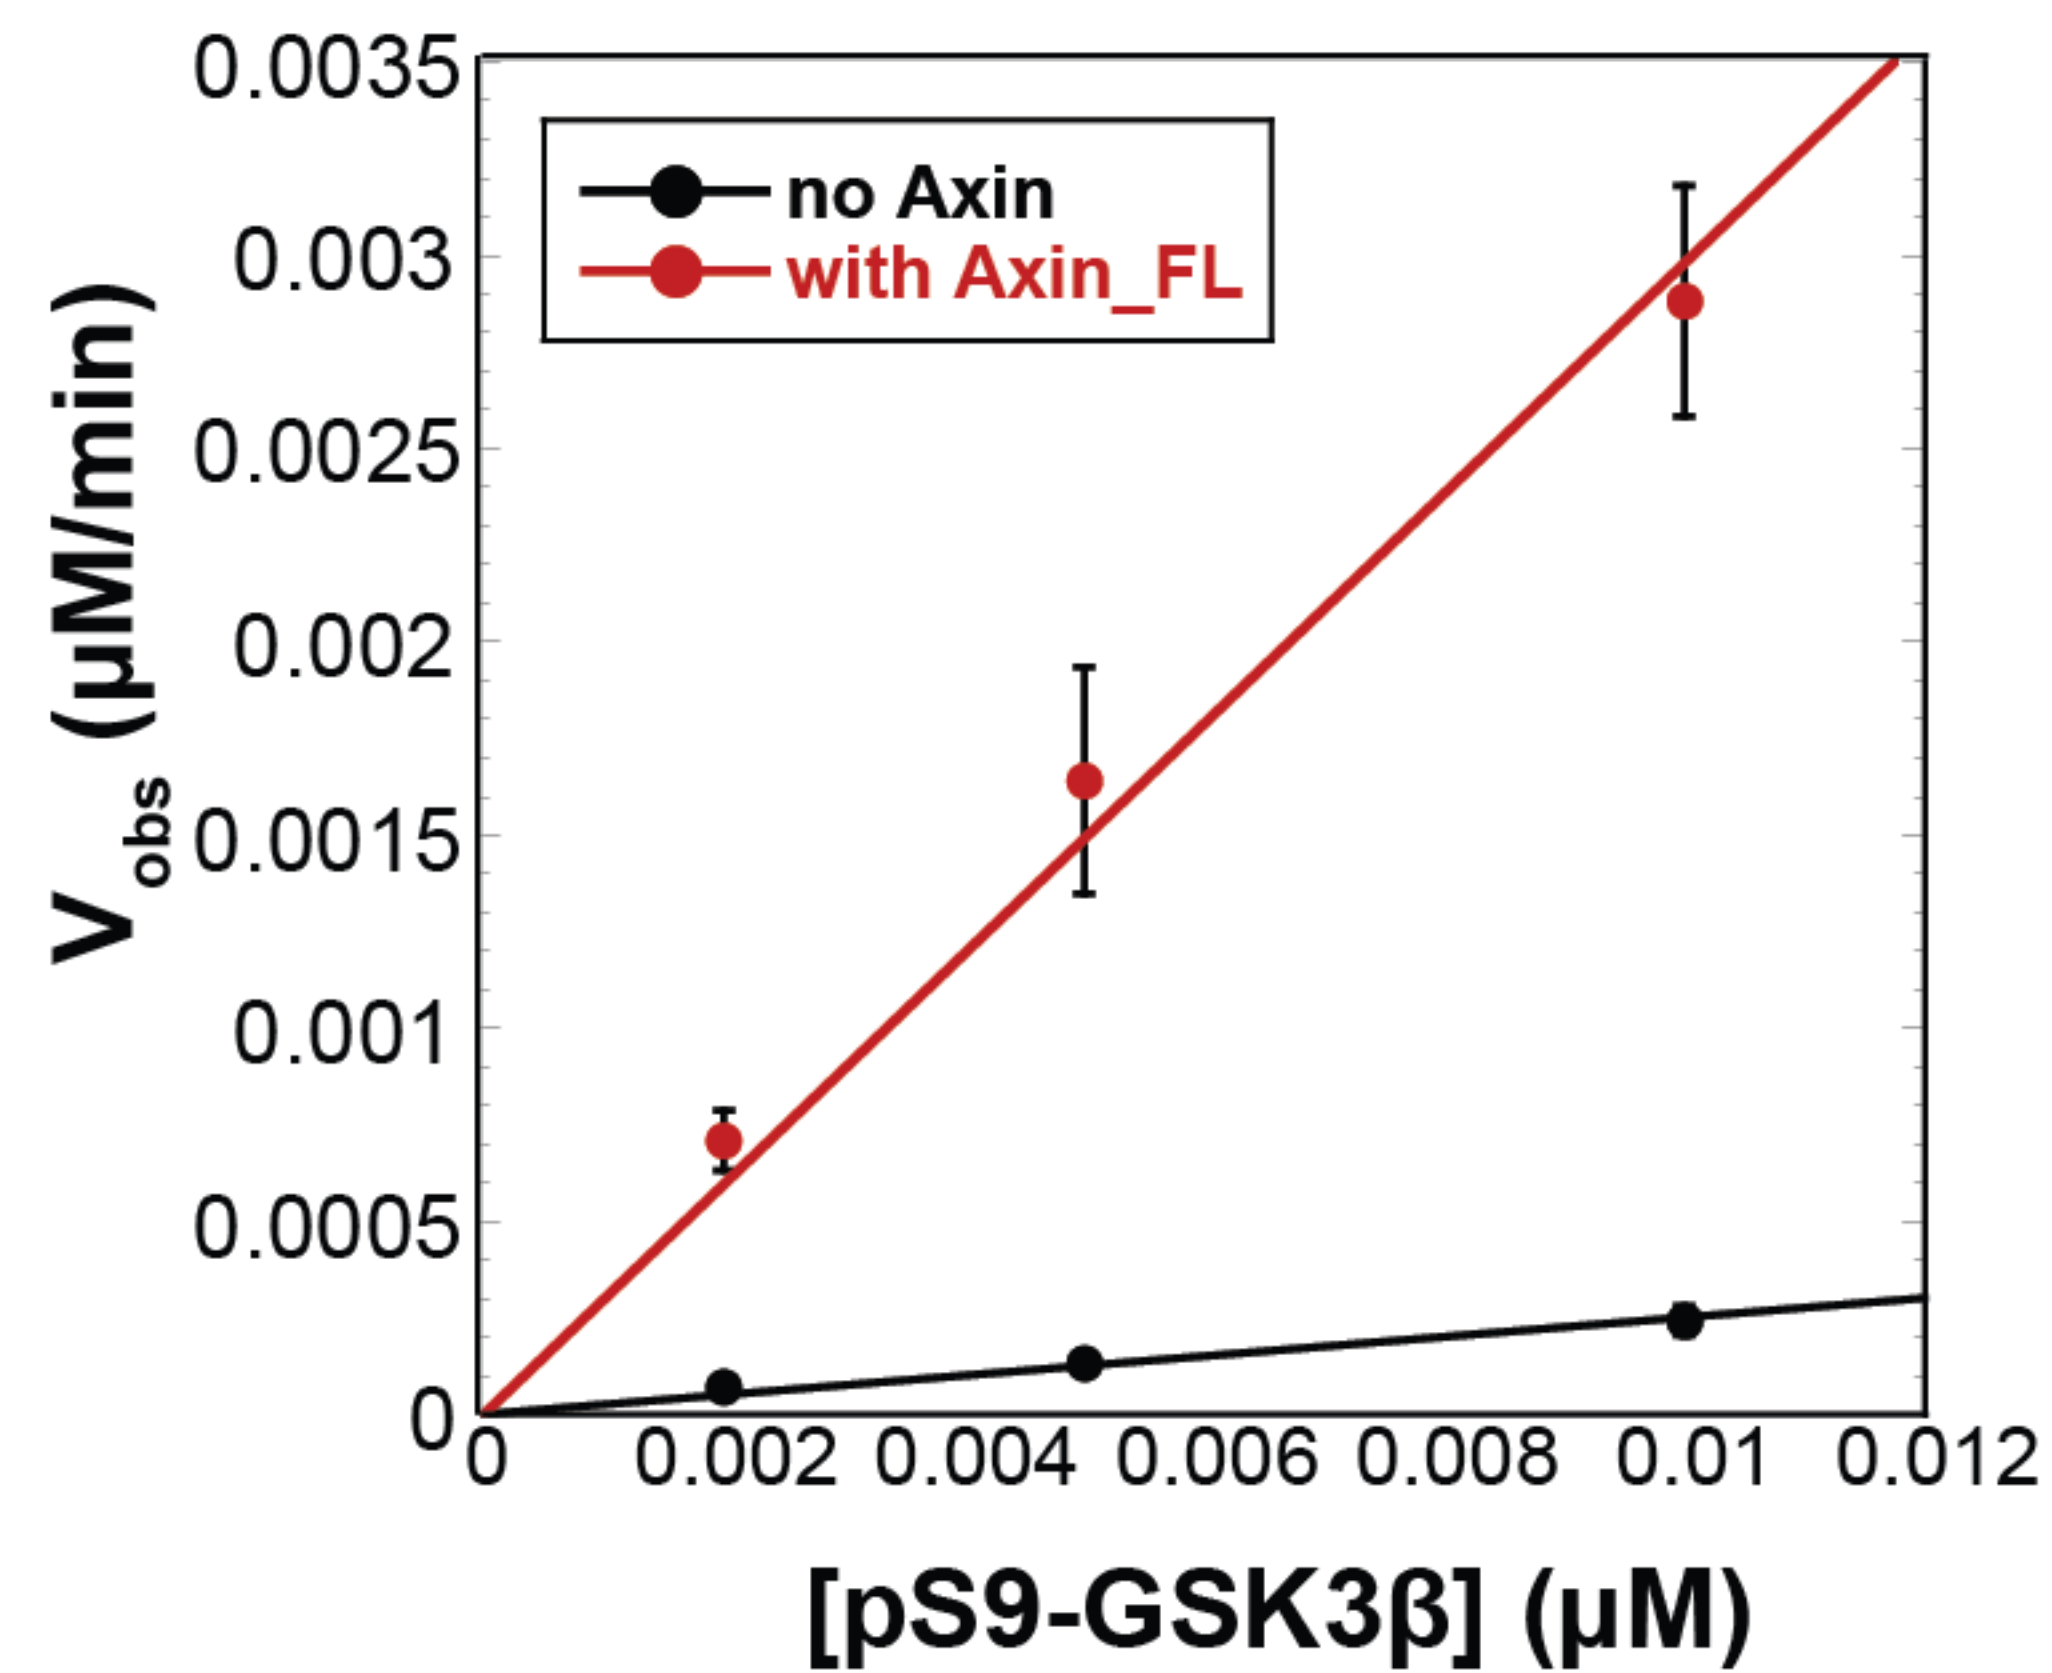

**C)** GSK3 $\beta$  S9A phosphorylation  
of pS45- $\beta$ -catenin

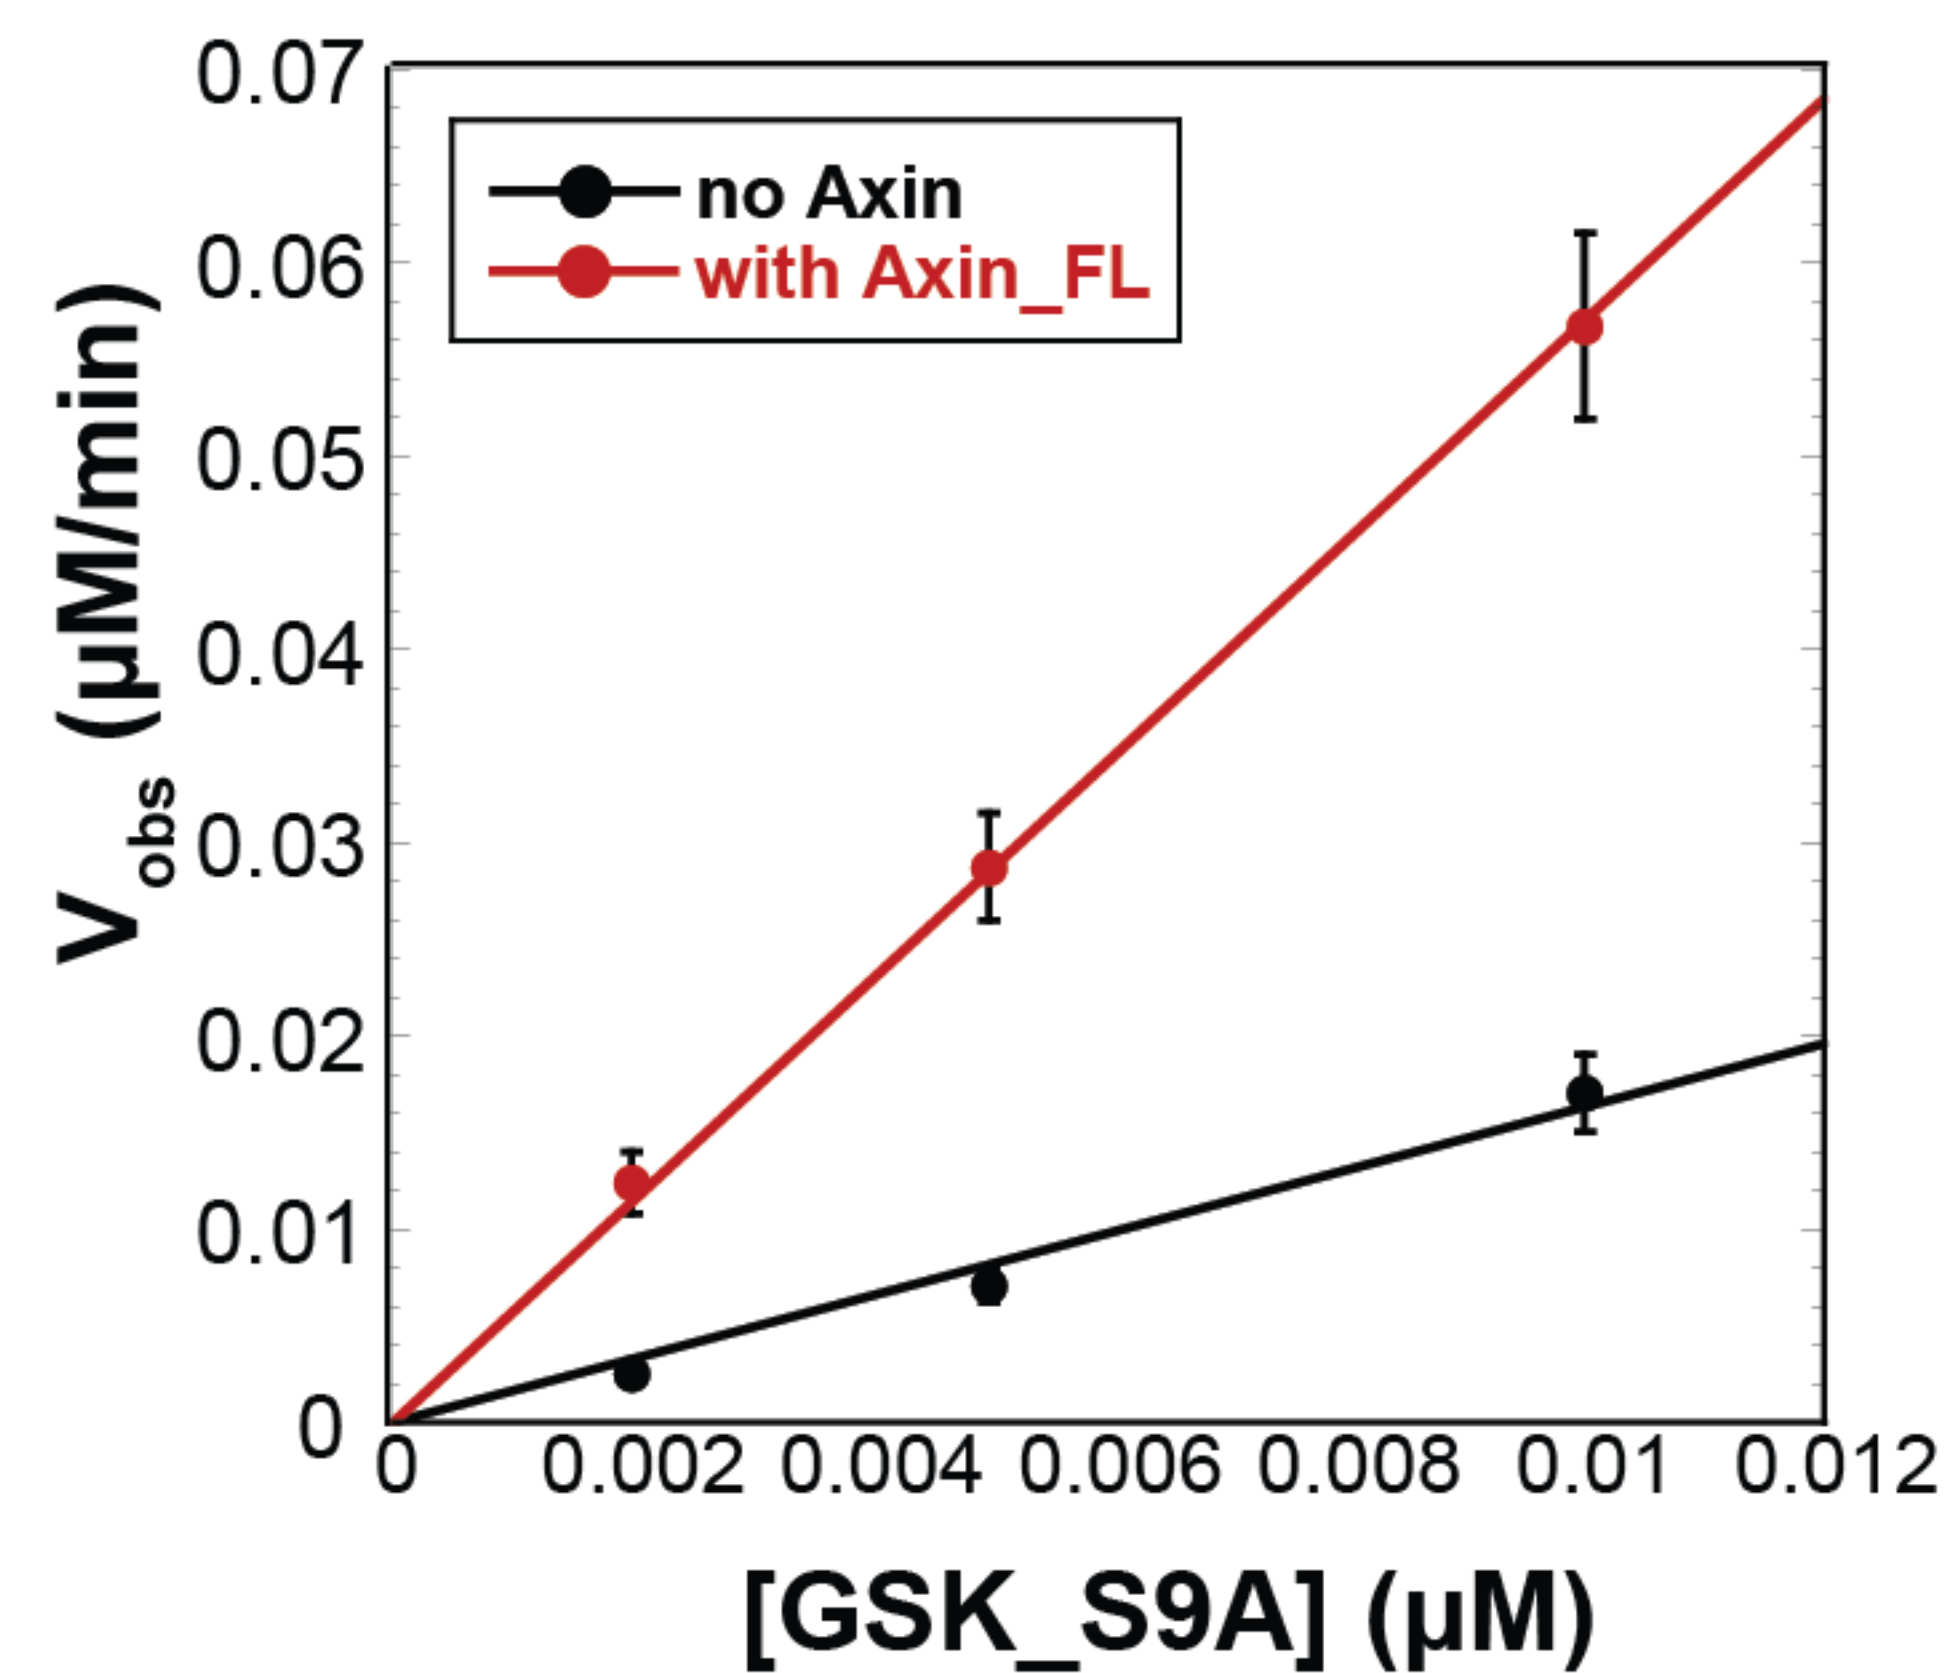

**D)** PKA phosphorylation  
of GSK3 $\beta$

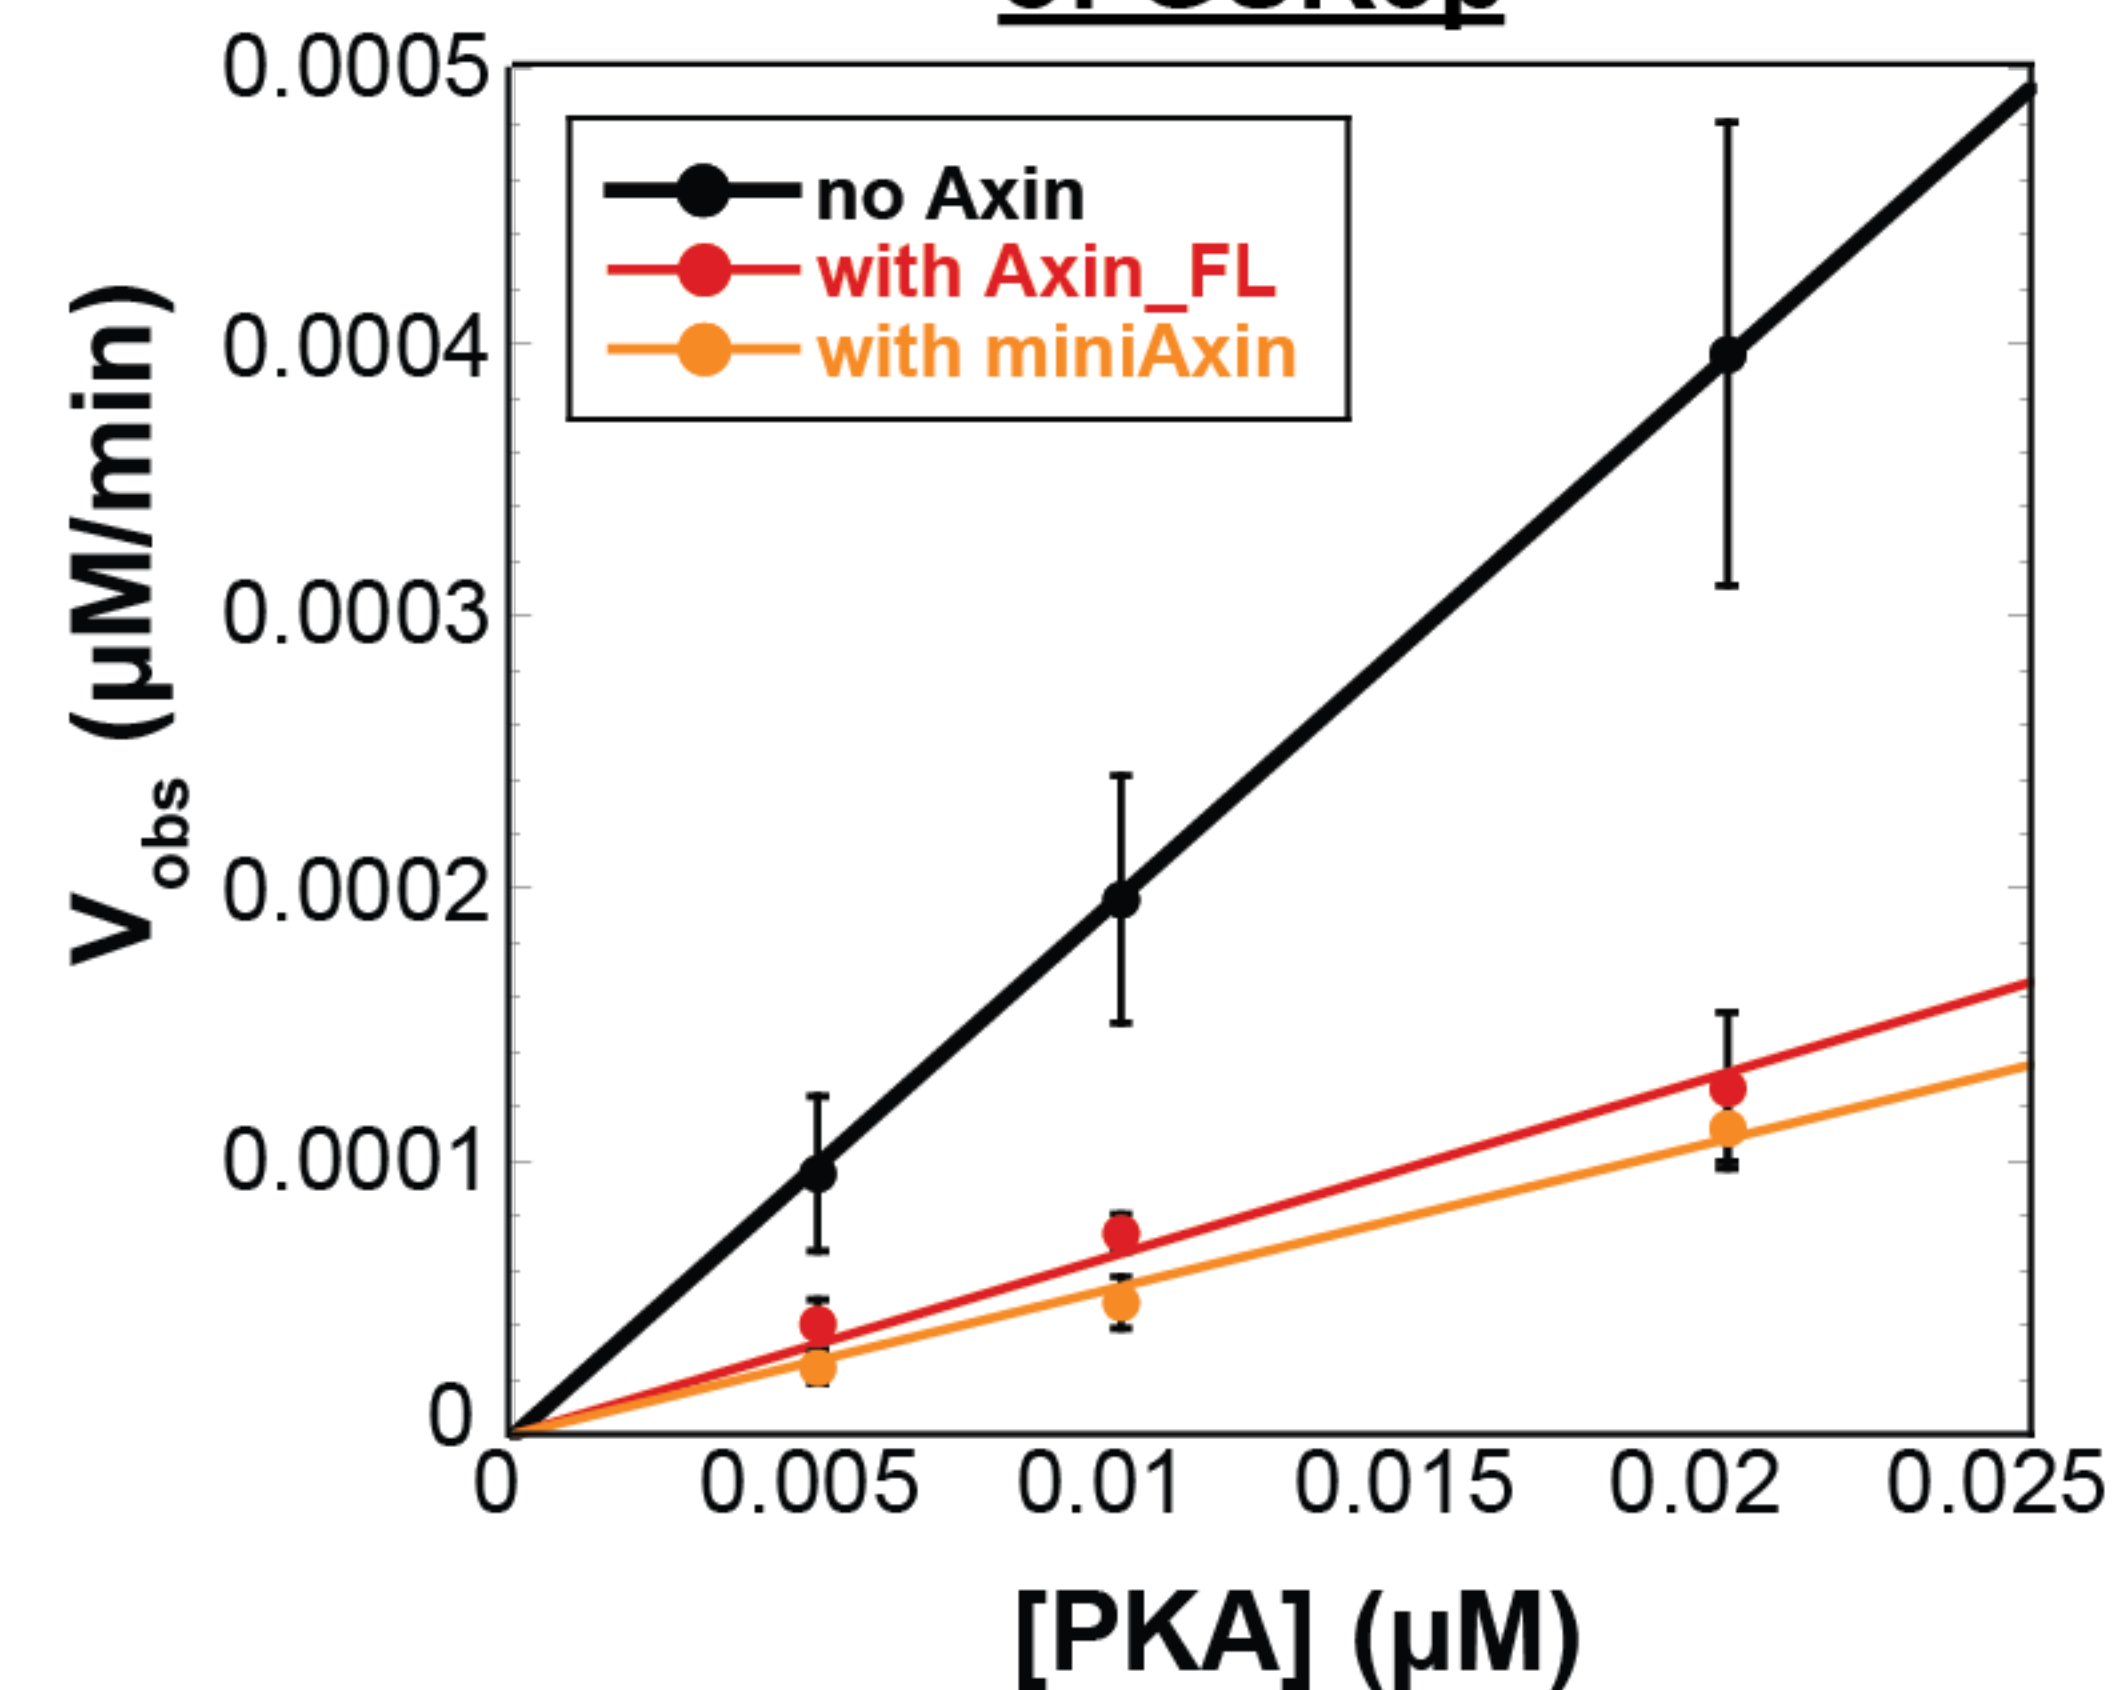

**E)** PKA phosphorylation  
of CREB<sub>127-135</sub>

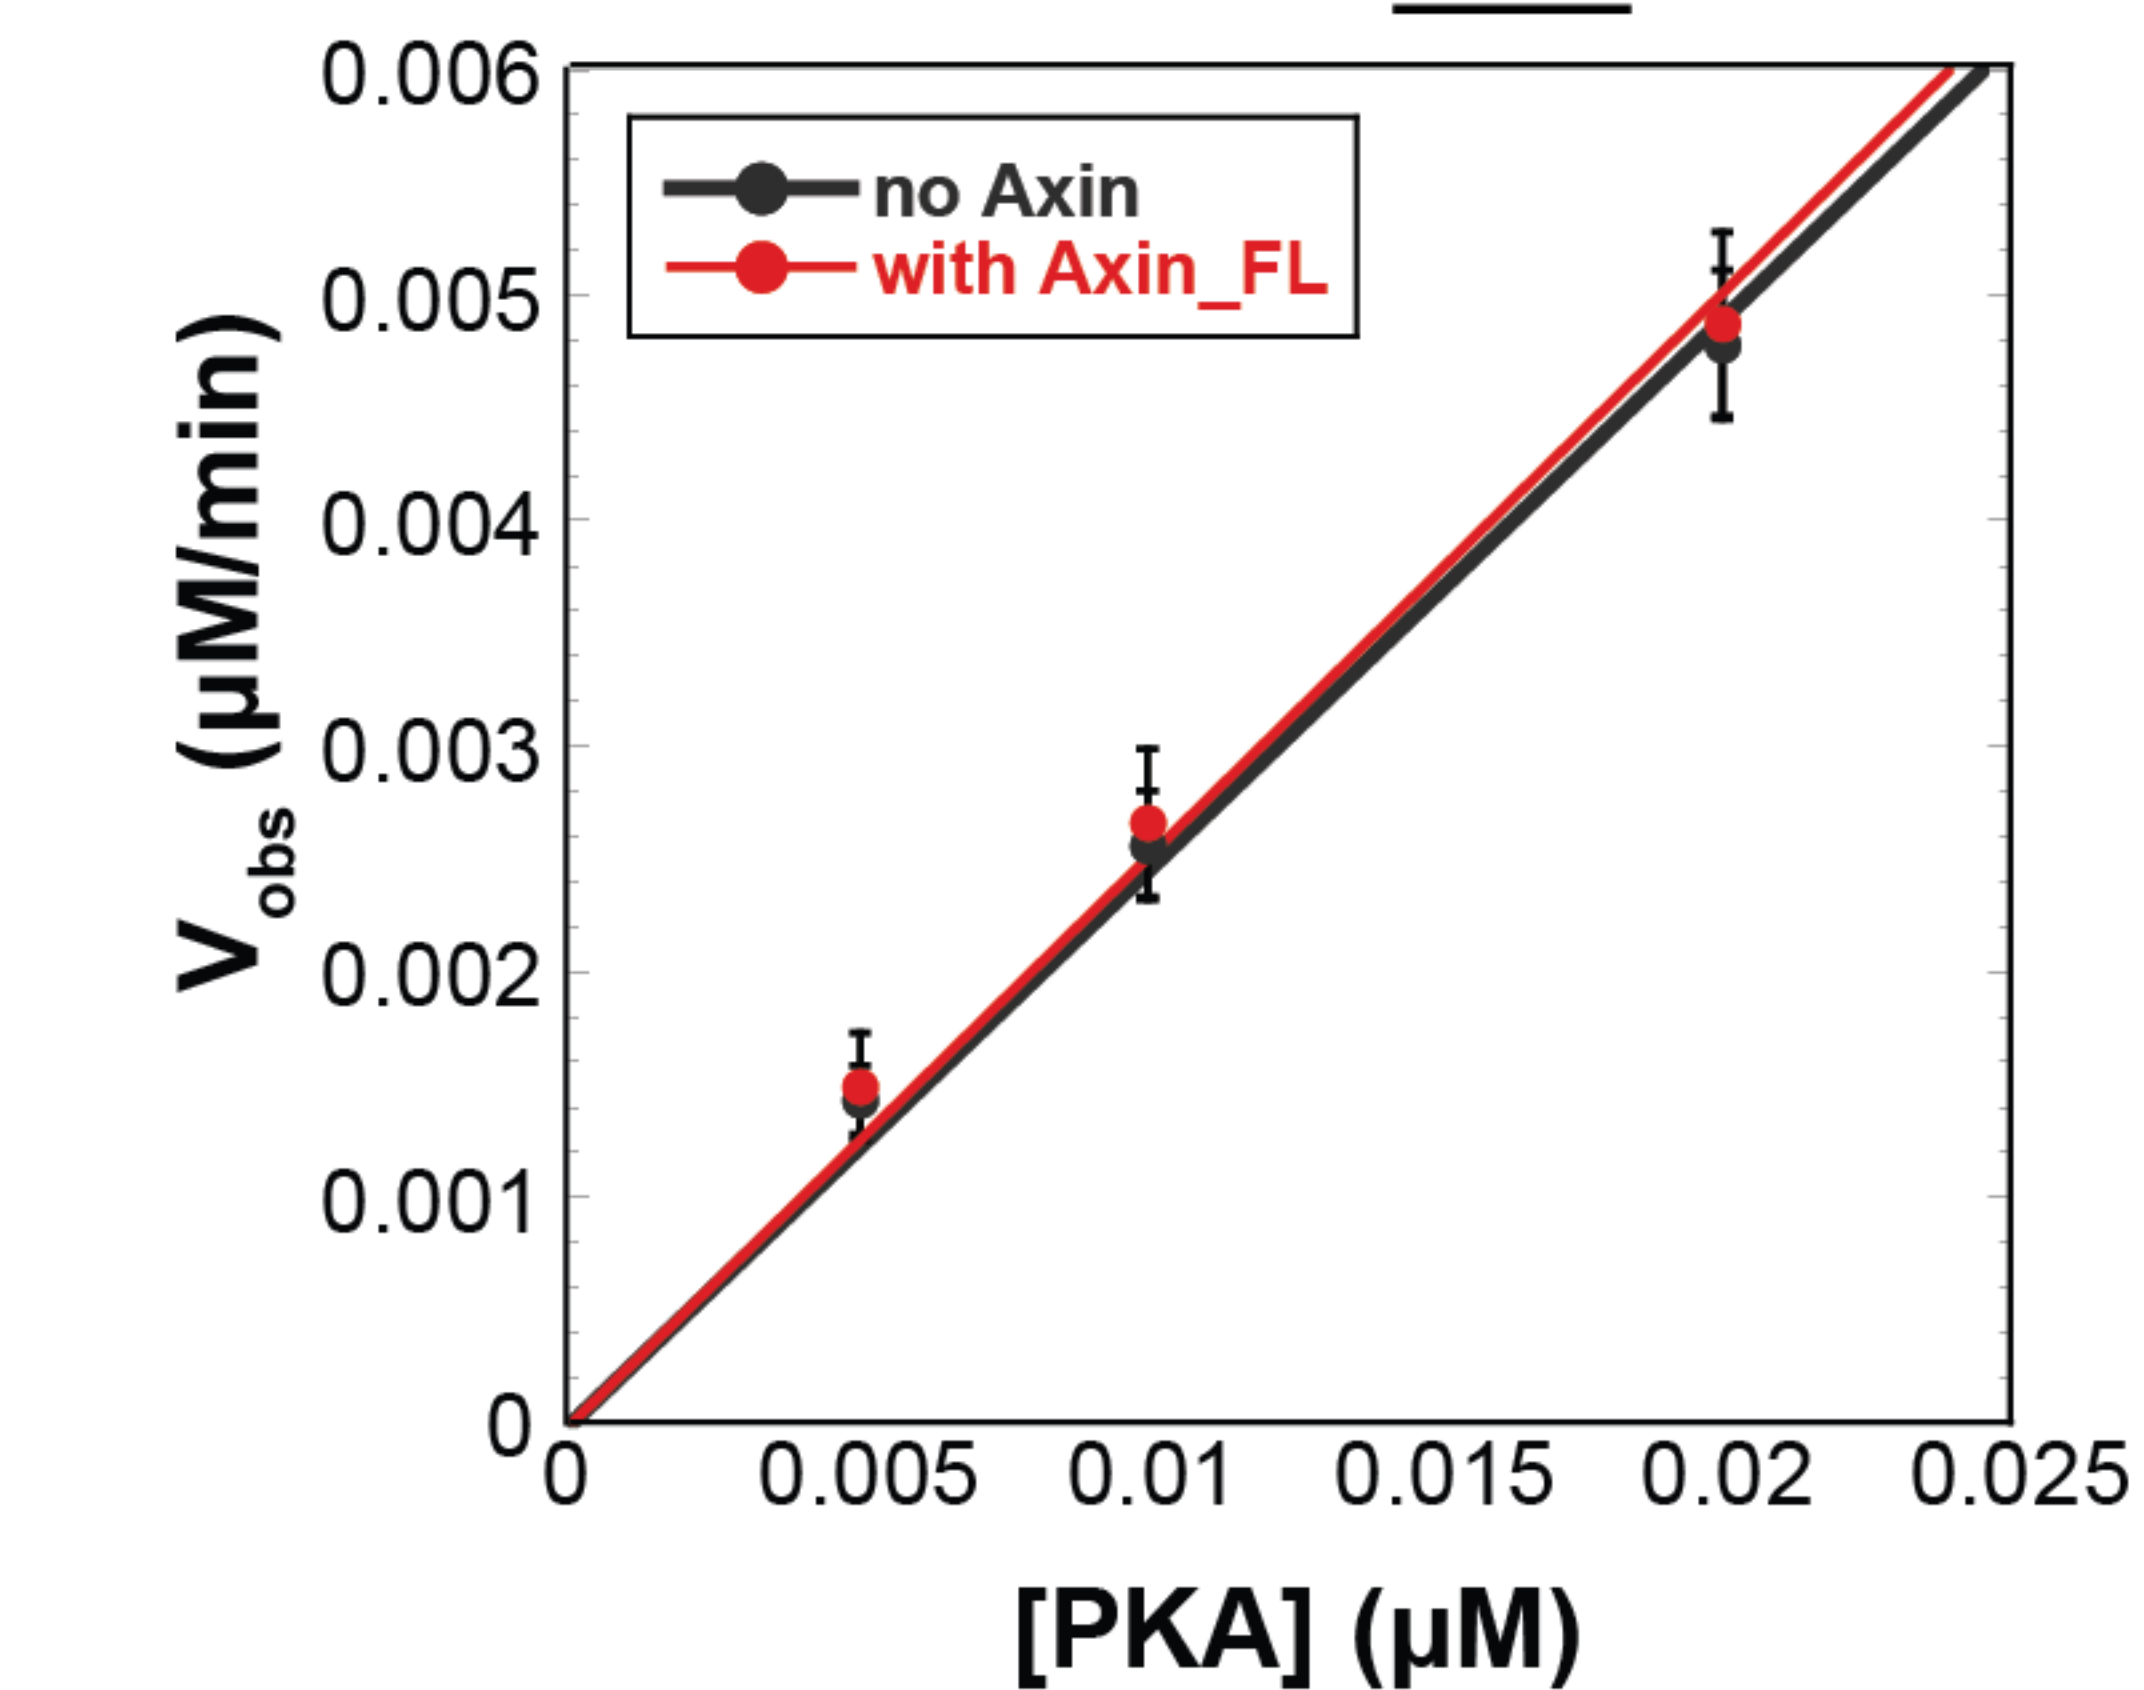

Supplement: supp [file elife-85444-supp-v1.zip]
