# Supplementary material for: The Axin scaffold protects the kinase GSK3β from cross-pathway inhibition
Source: eLife journal article supplement (doi:10.7554/elife.85444), 2023-08-07
Supplement: supp [file elife-85444-supp-v1.zip]

Endpt (50nM)  
MW ladder

rxn rxn rxn  
1 2 5 10 1 2 5 10 1 2 5 10

Endpt (50nM)

**15-well gel layout**

*rxn timepoints: 1, 2, 5, 10 minutes*

**Replicate 1**

**Replicate 2**

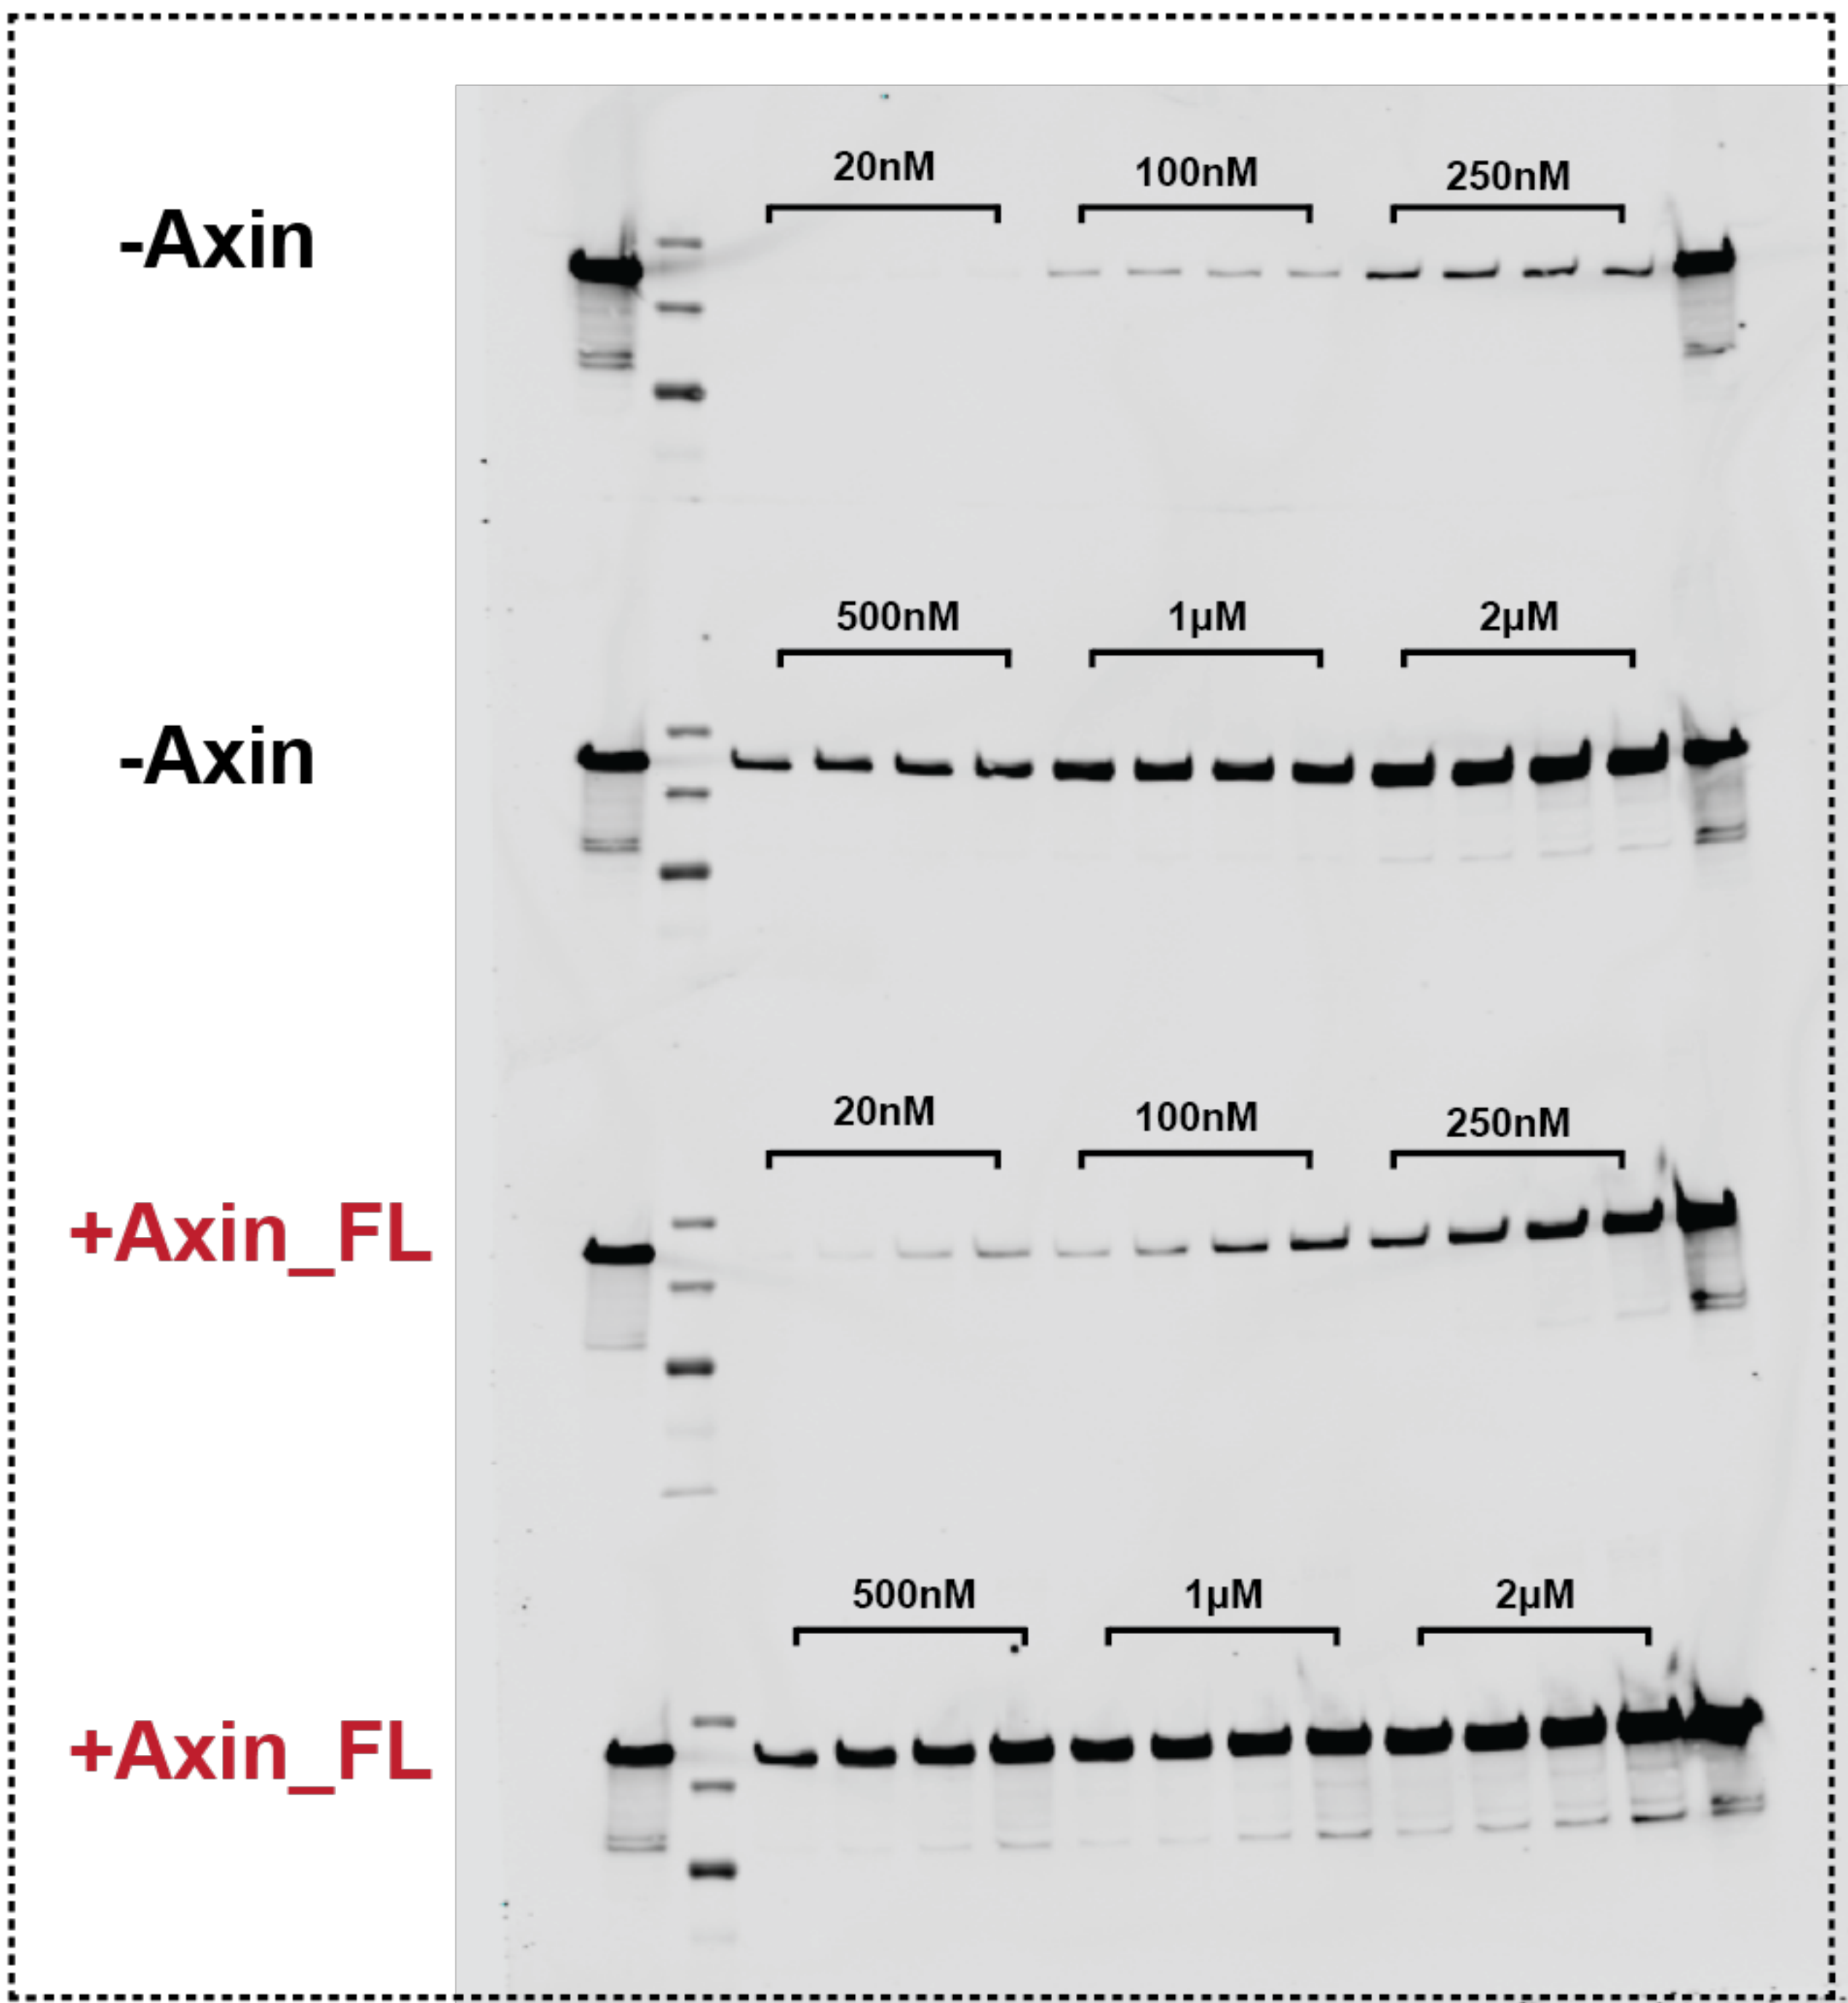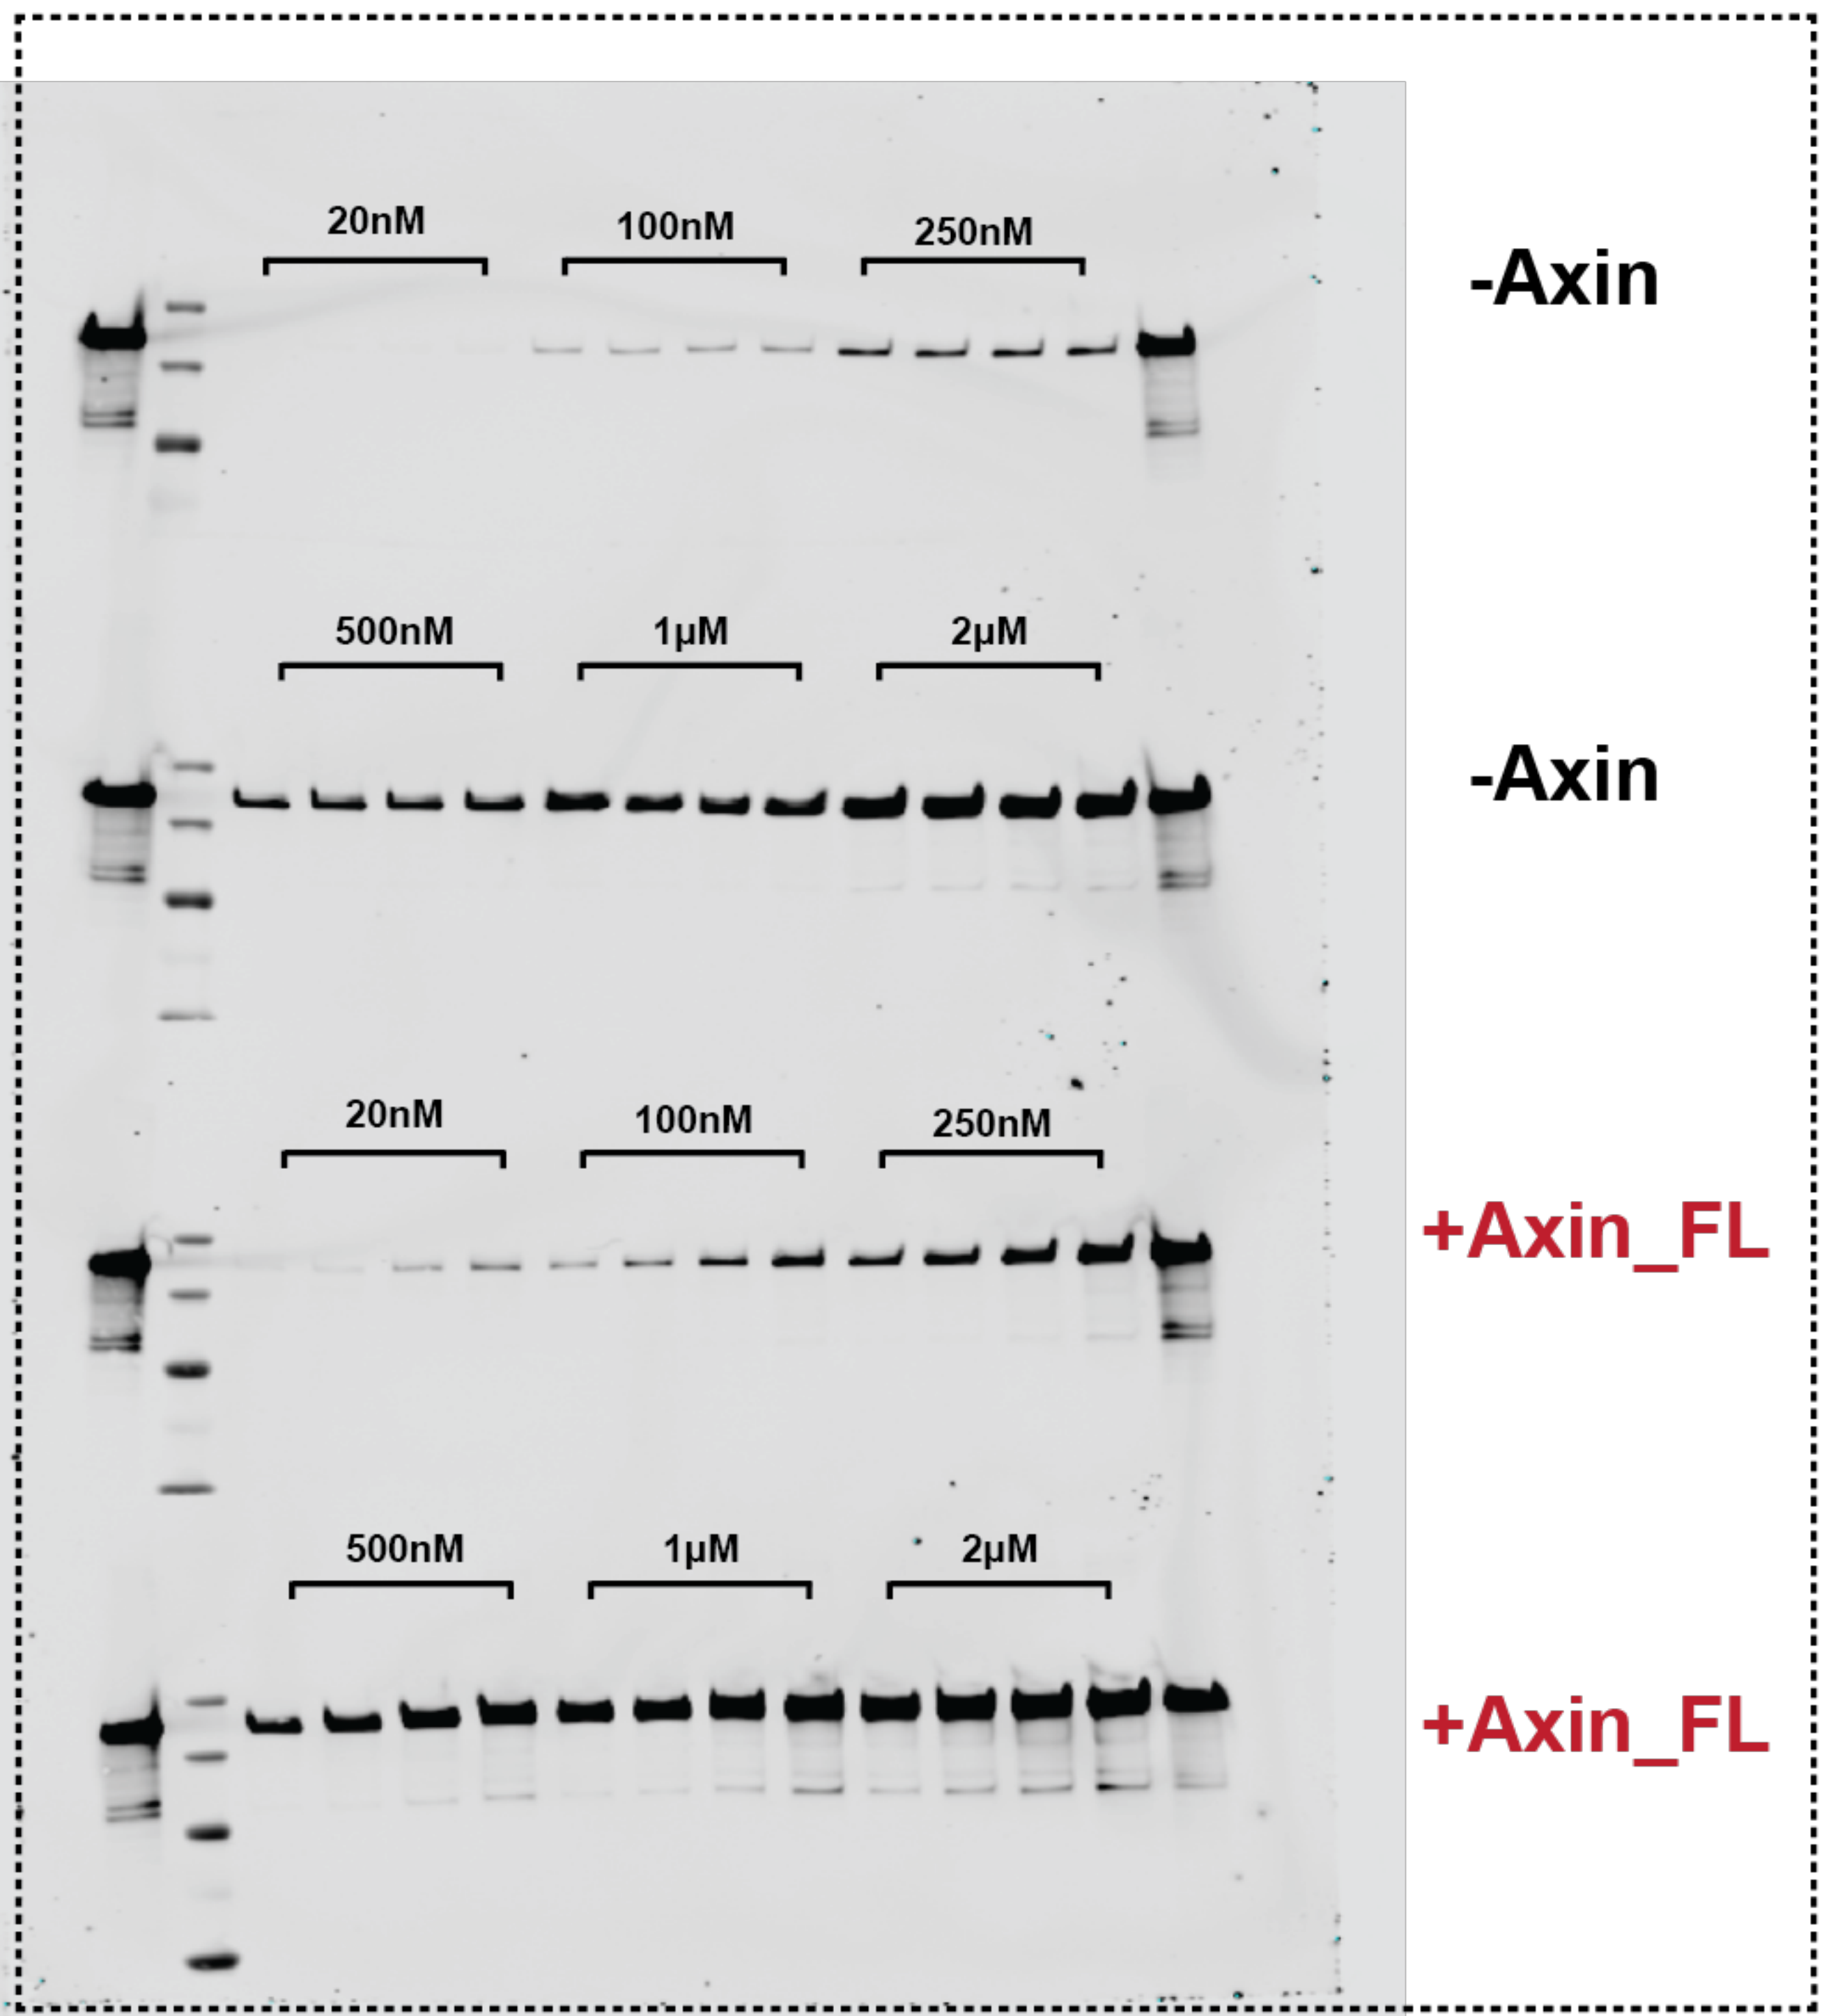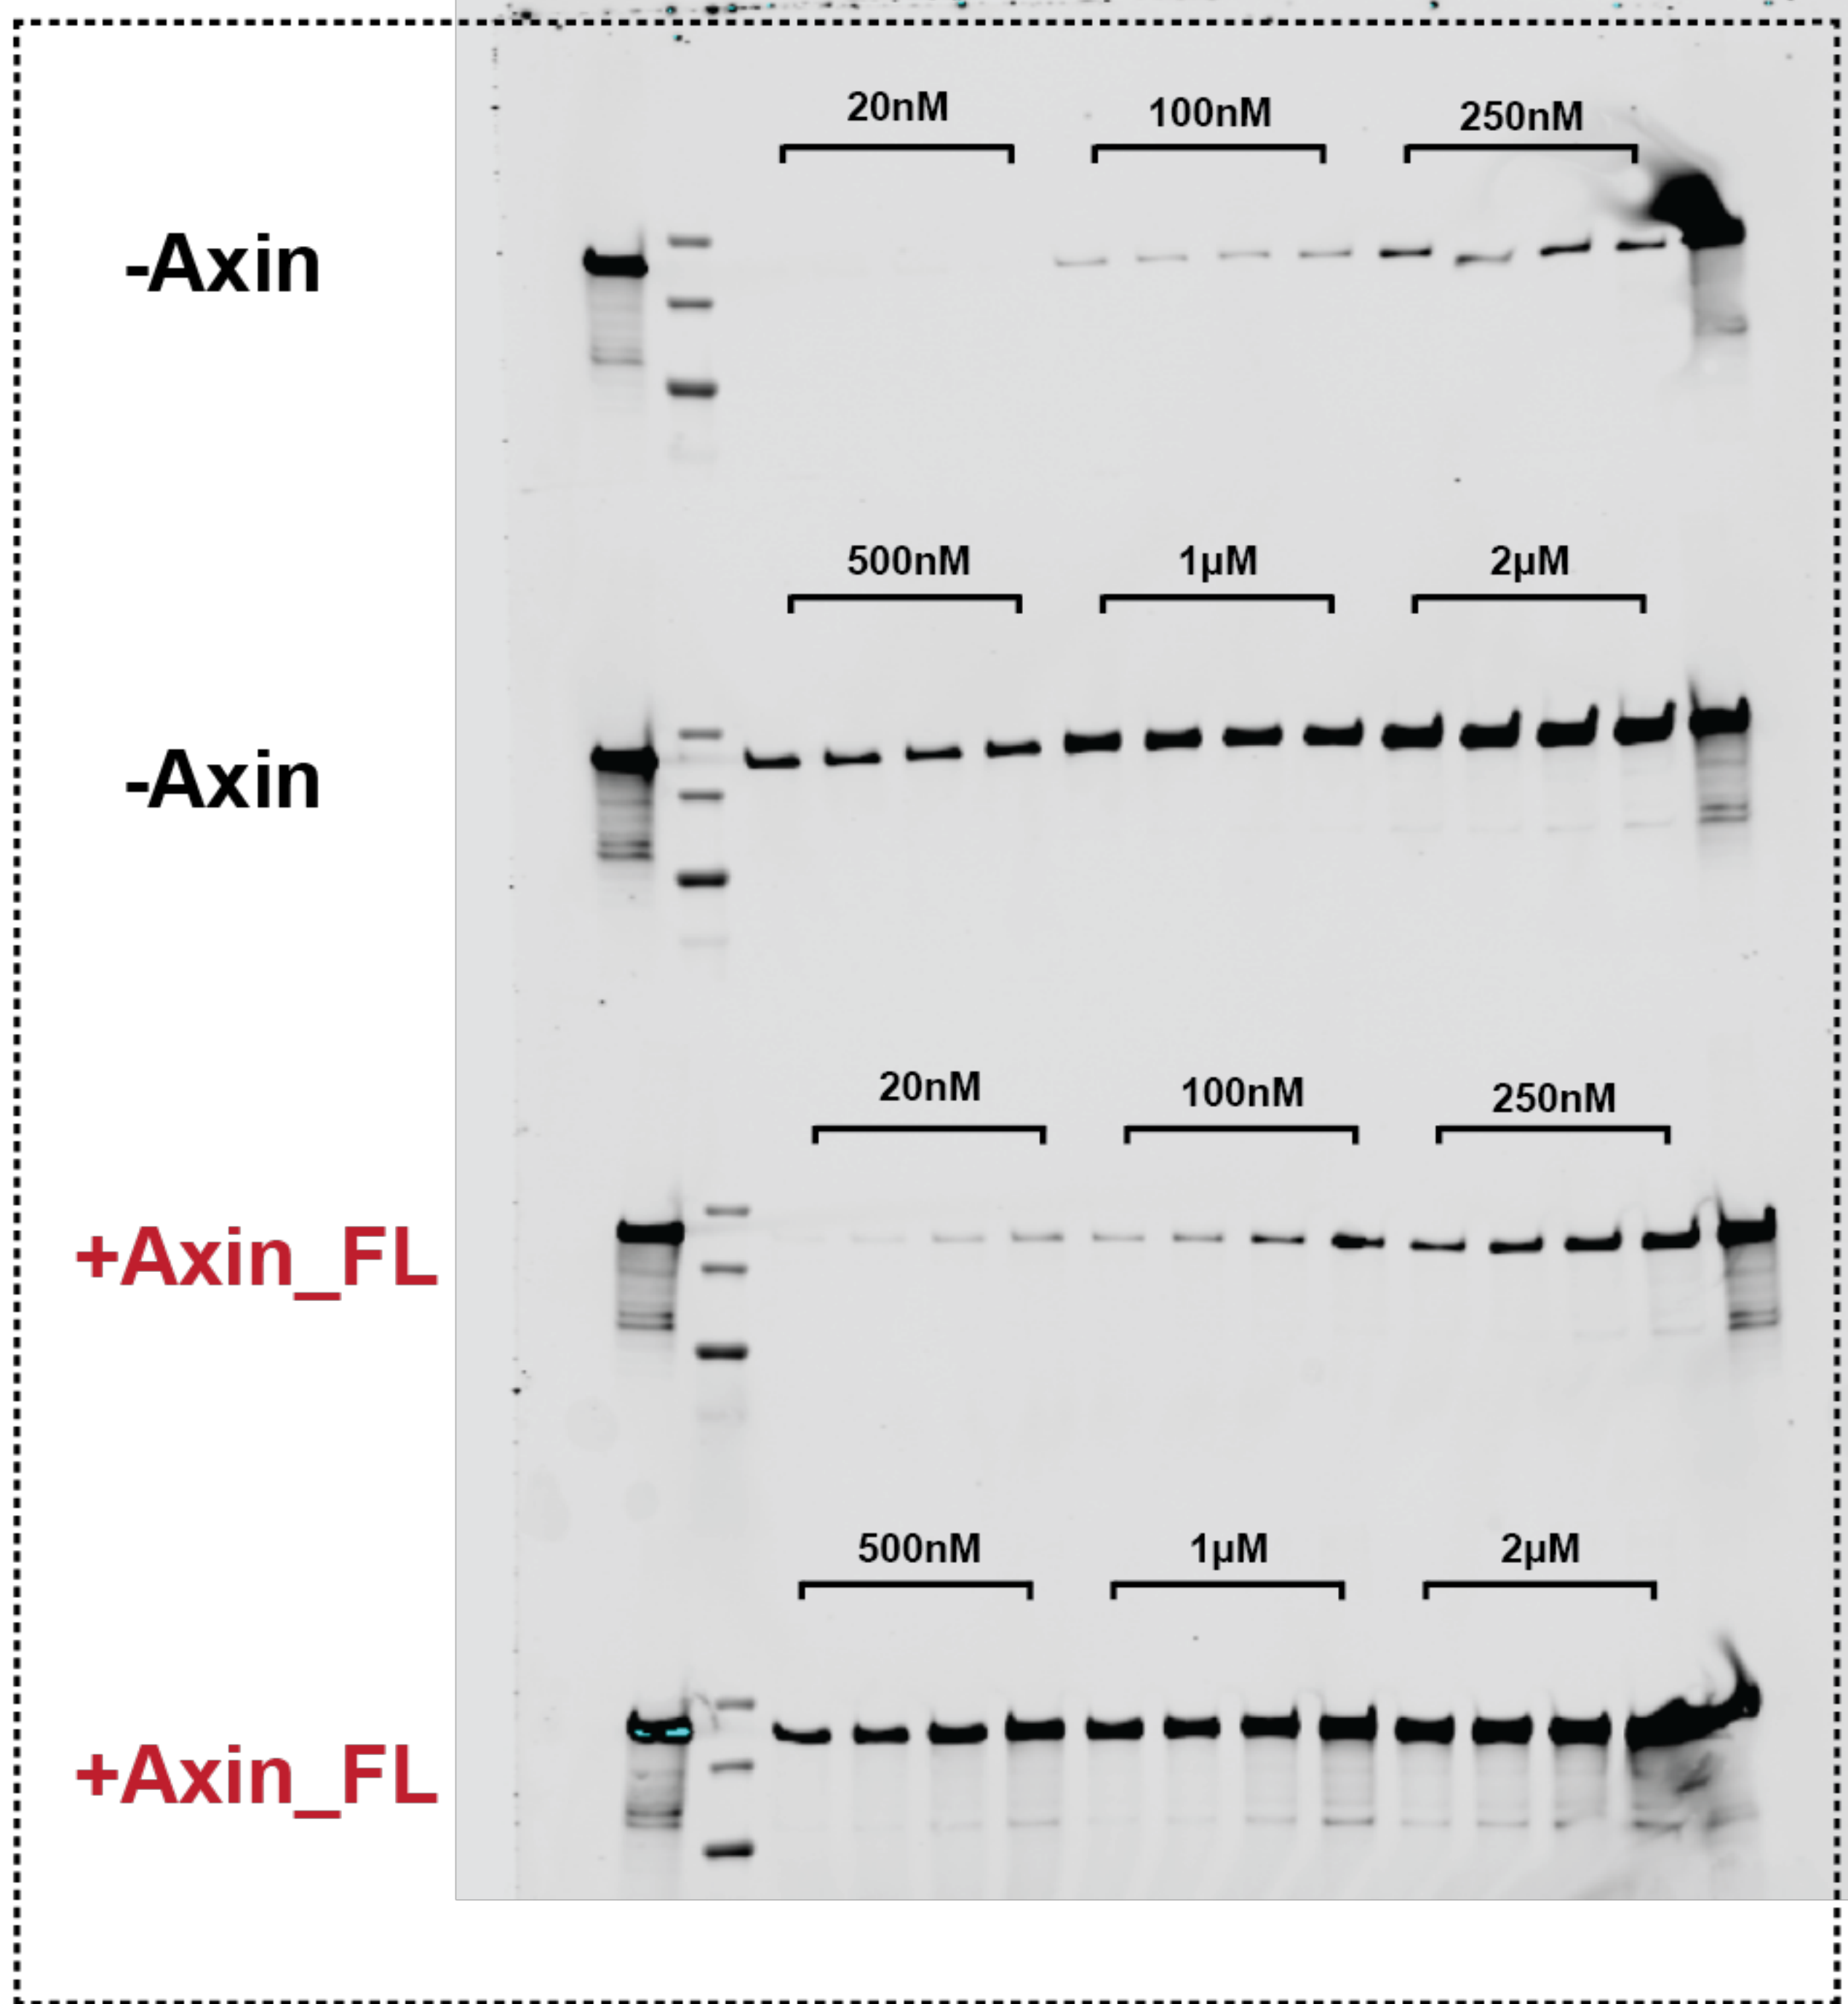

**Replicate 3**
