# Supplementary material for: The Axin scaffold protects the kinase GSK3β from cross-pathway inhibition
Source: eLife journal article supplement (doi:10.7554/elife.85444), 2023-08-07

**A) GSK3 $\beta$  phosphorylation  
of pS45- $\beta$ -catenin**

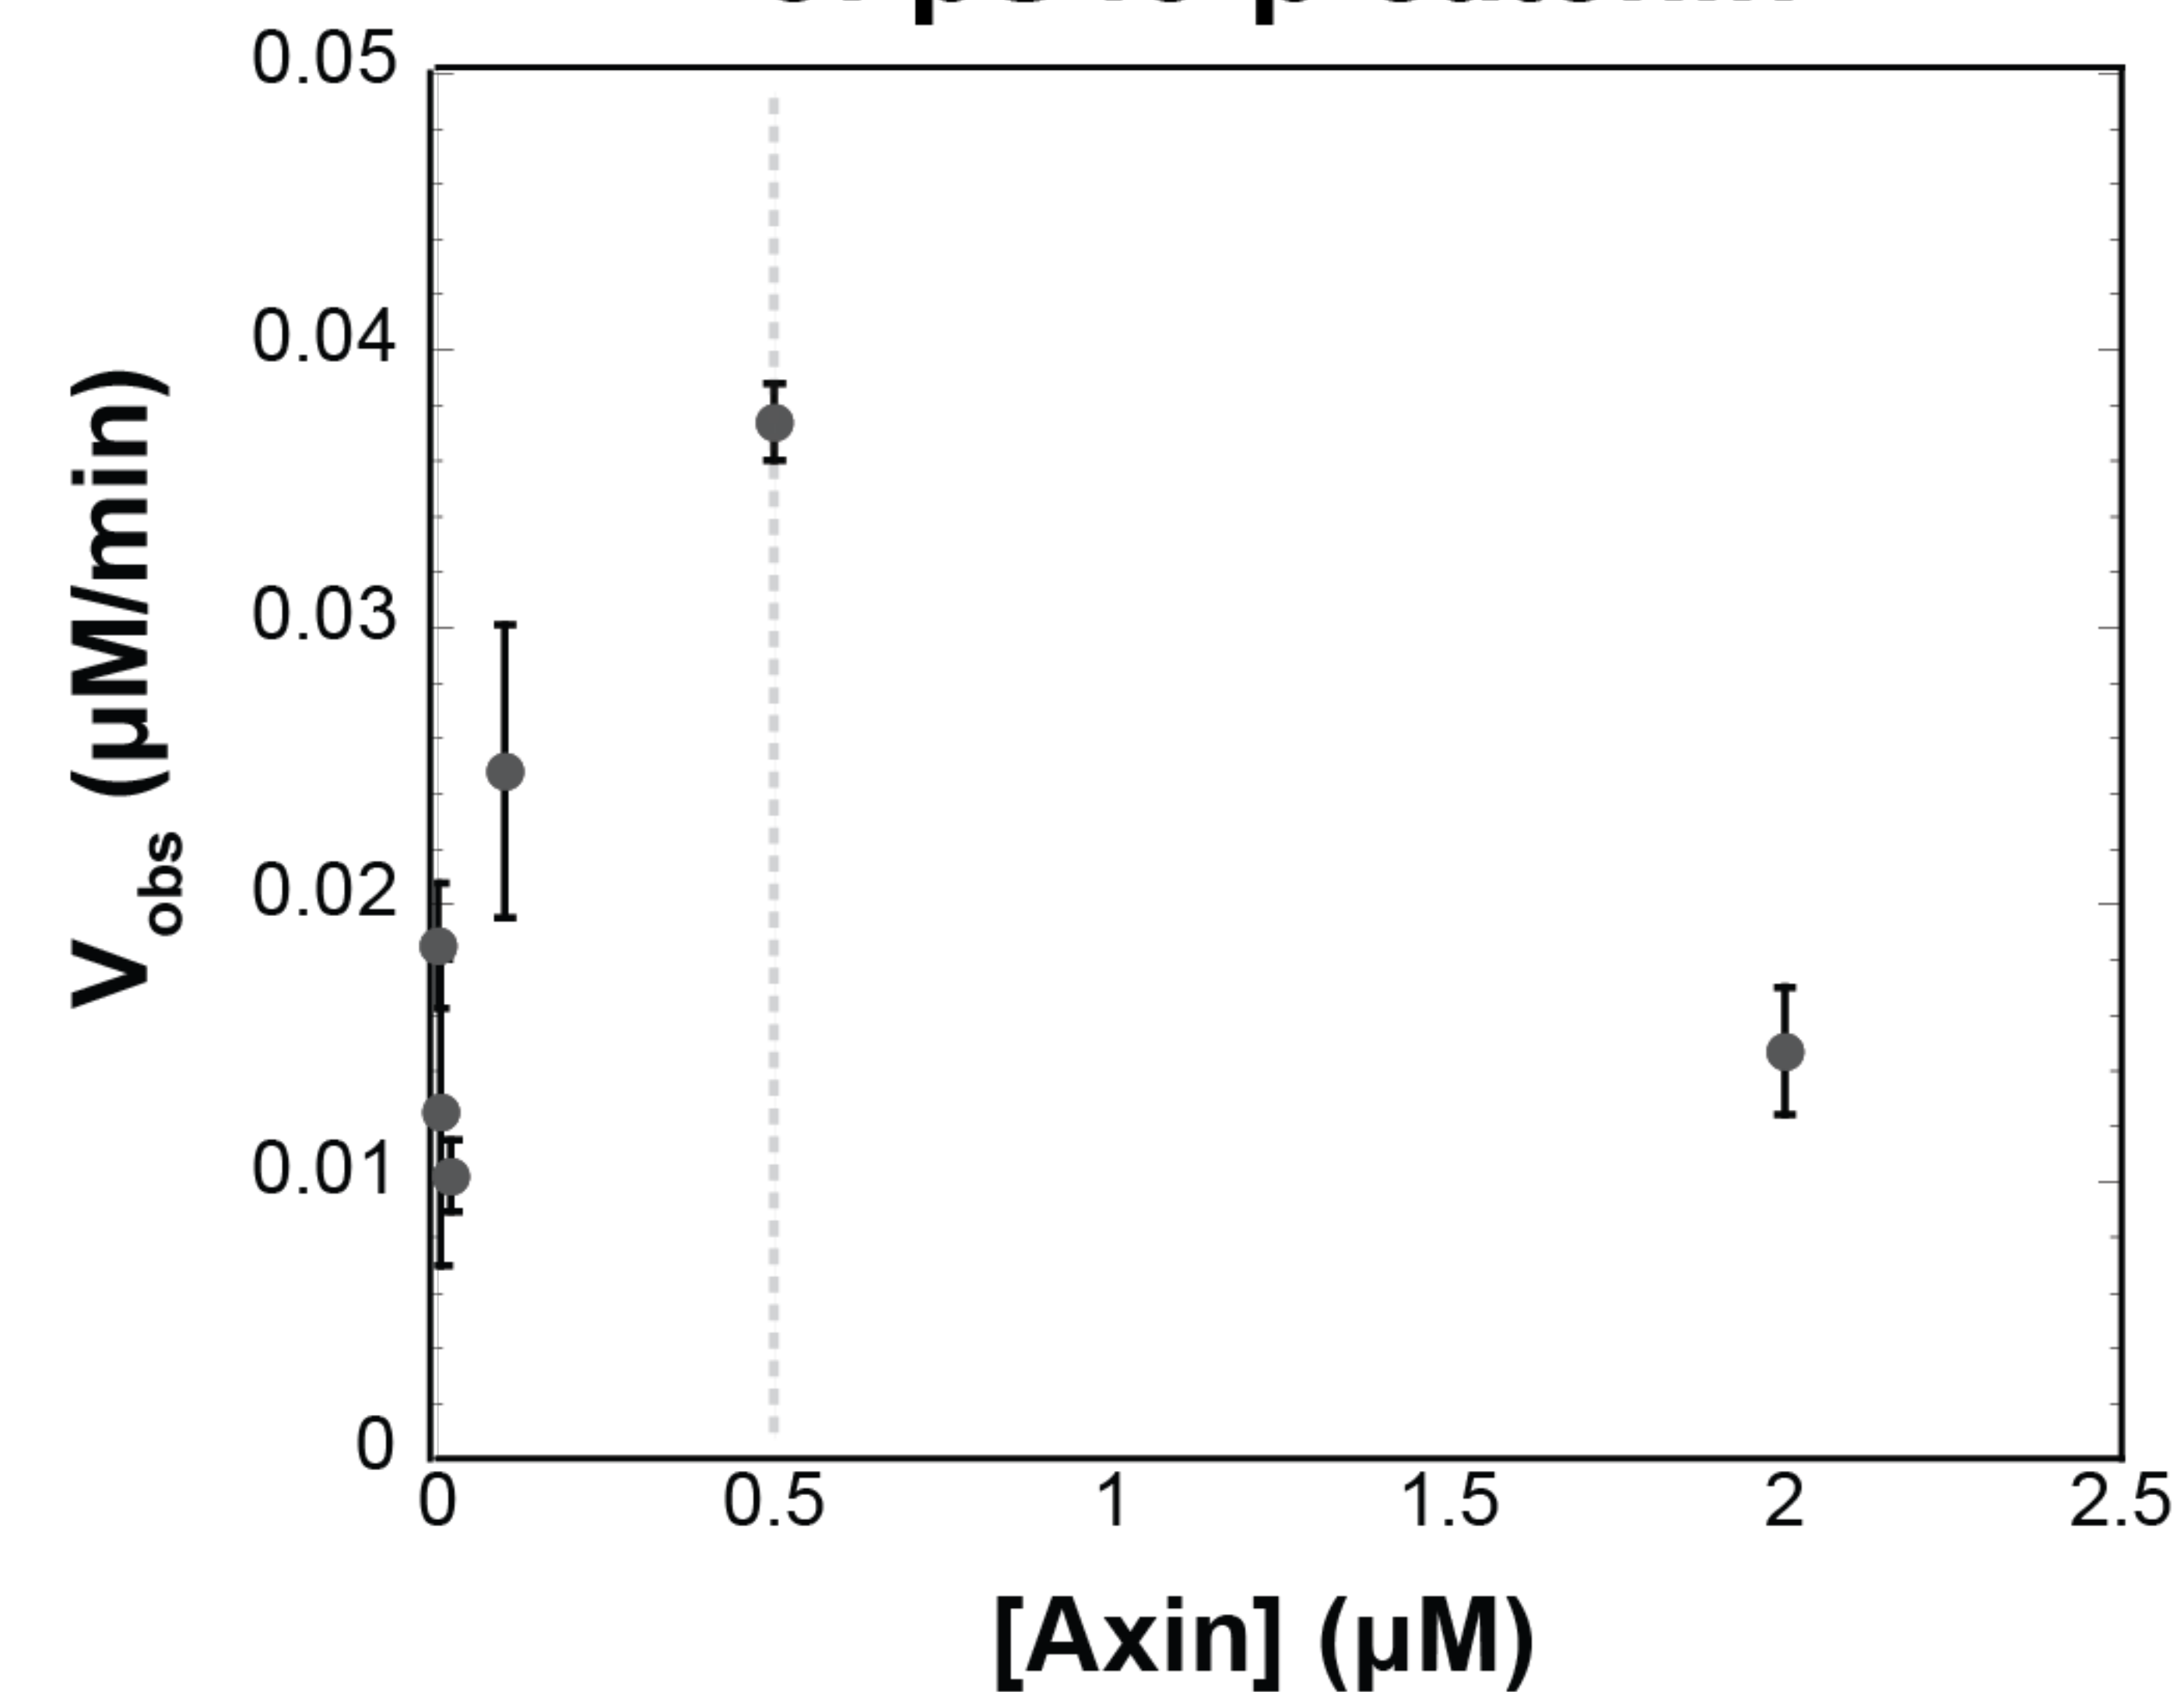

**B) pS9-GSK3 $\beta$  phosphorylation  
of pS45- $\beta$ -catenin**

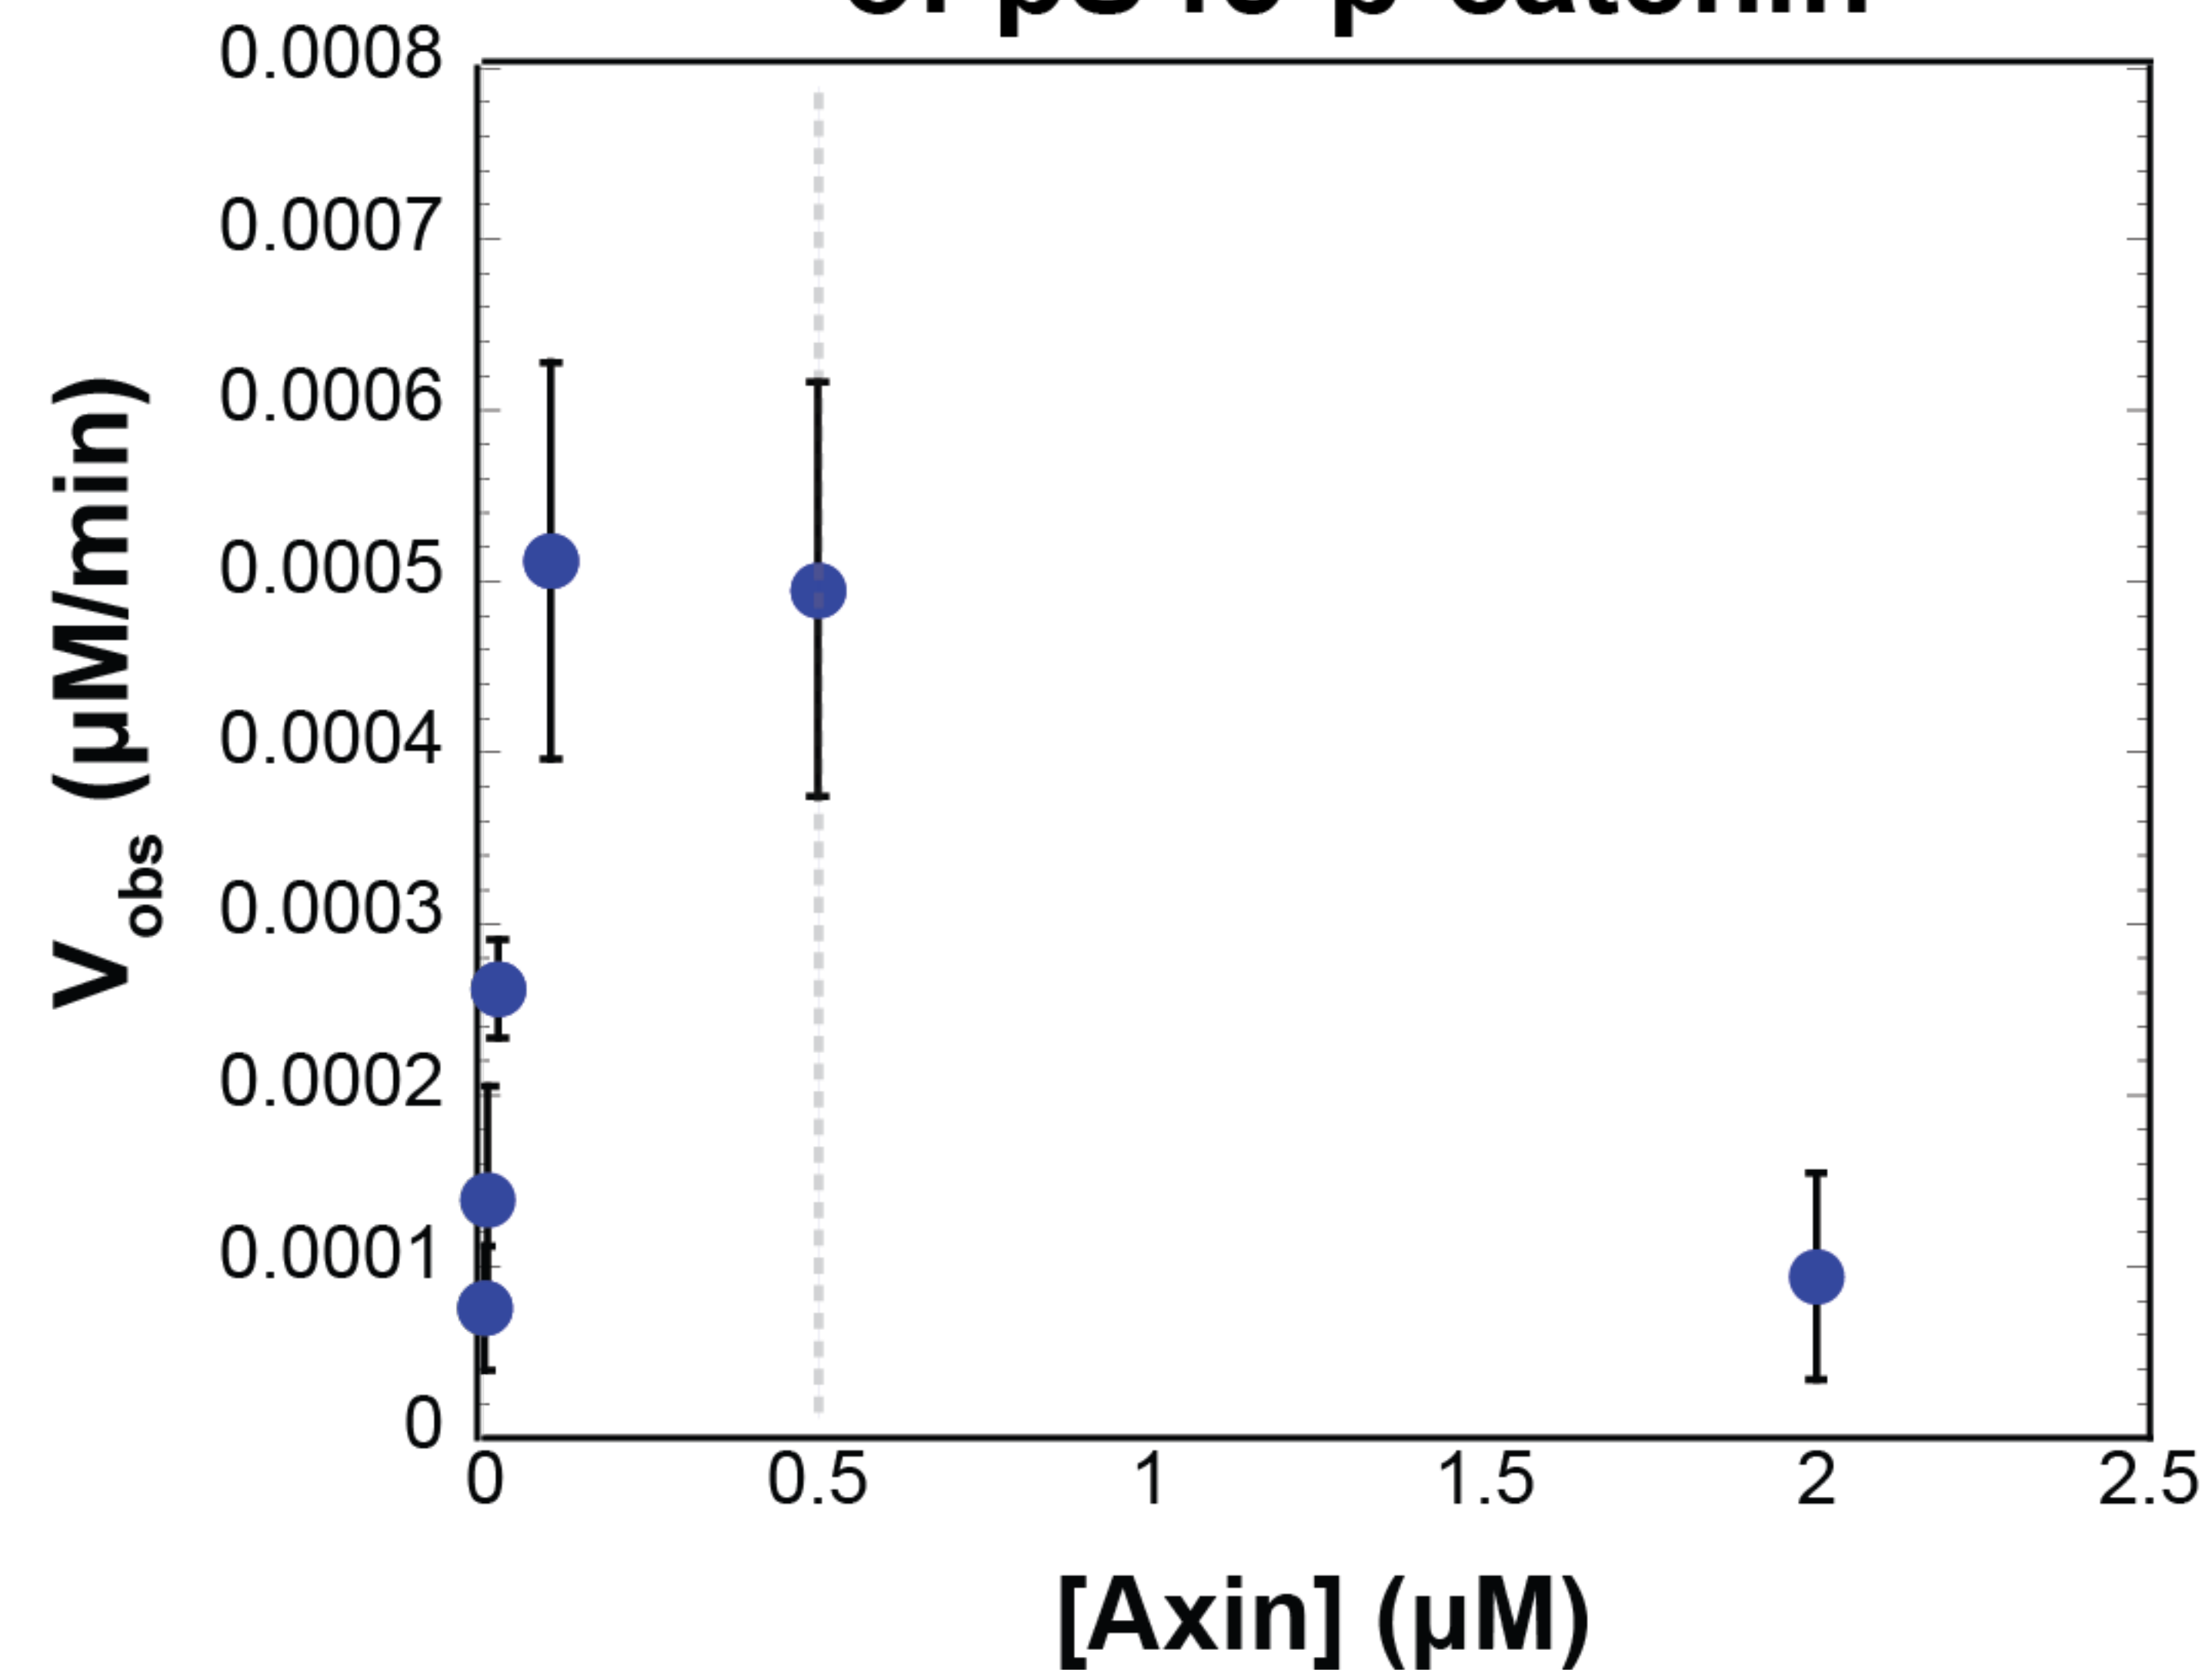

**C) PKA phosphorylation  
of GSK3 $\beta$**

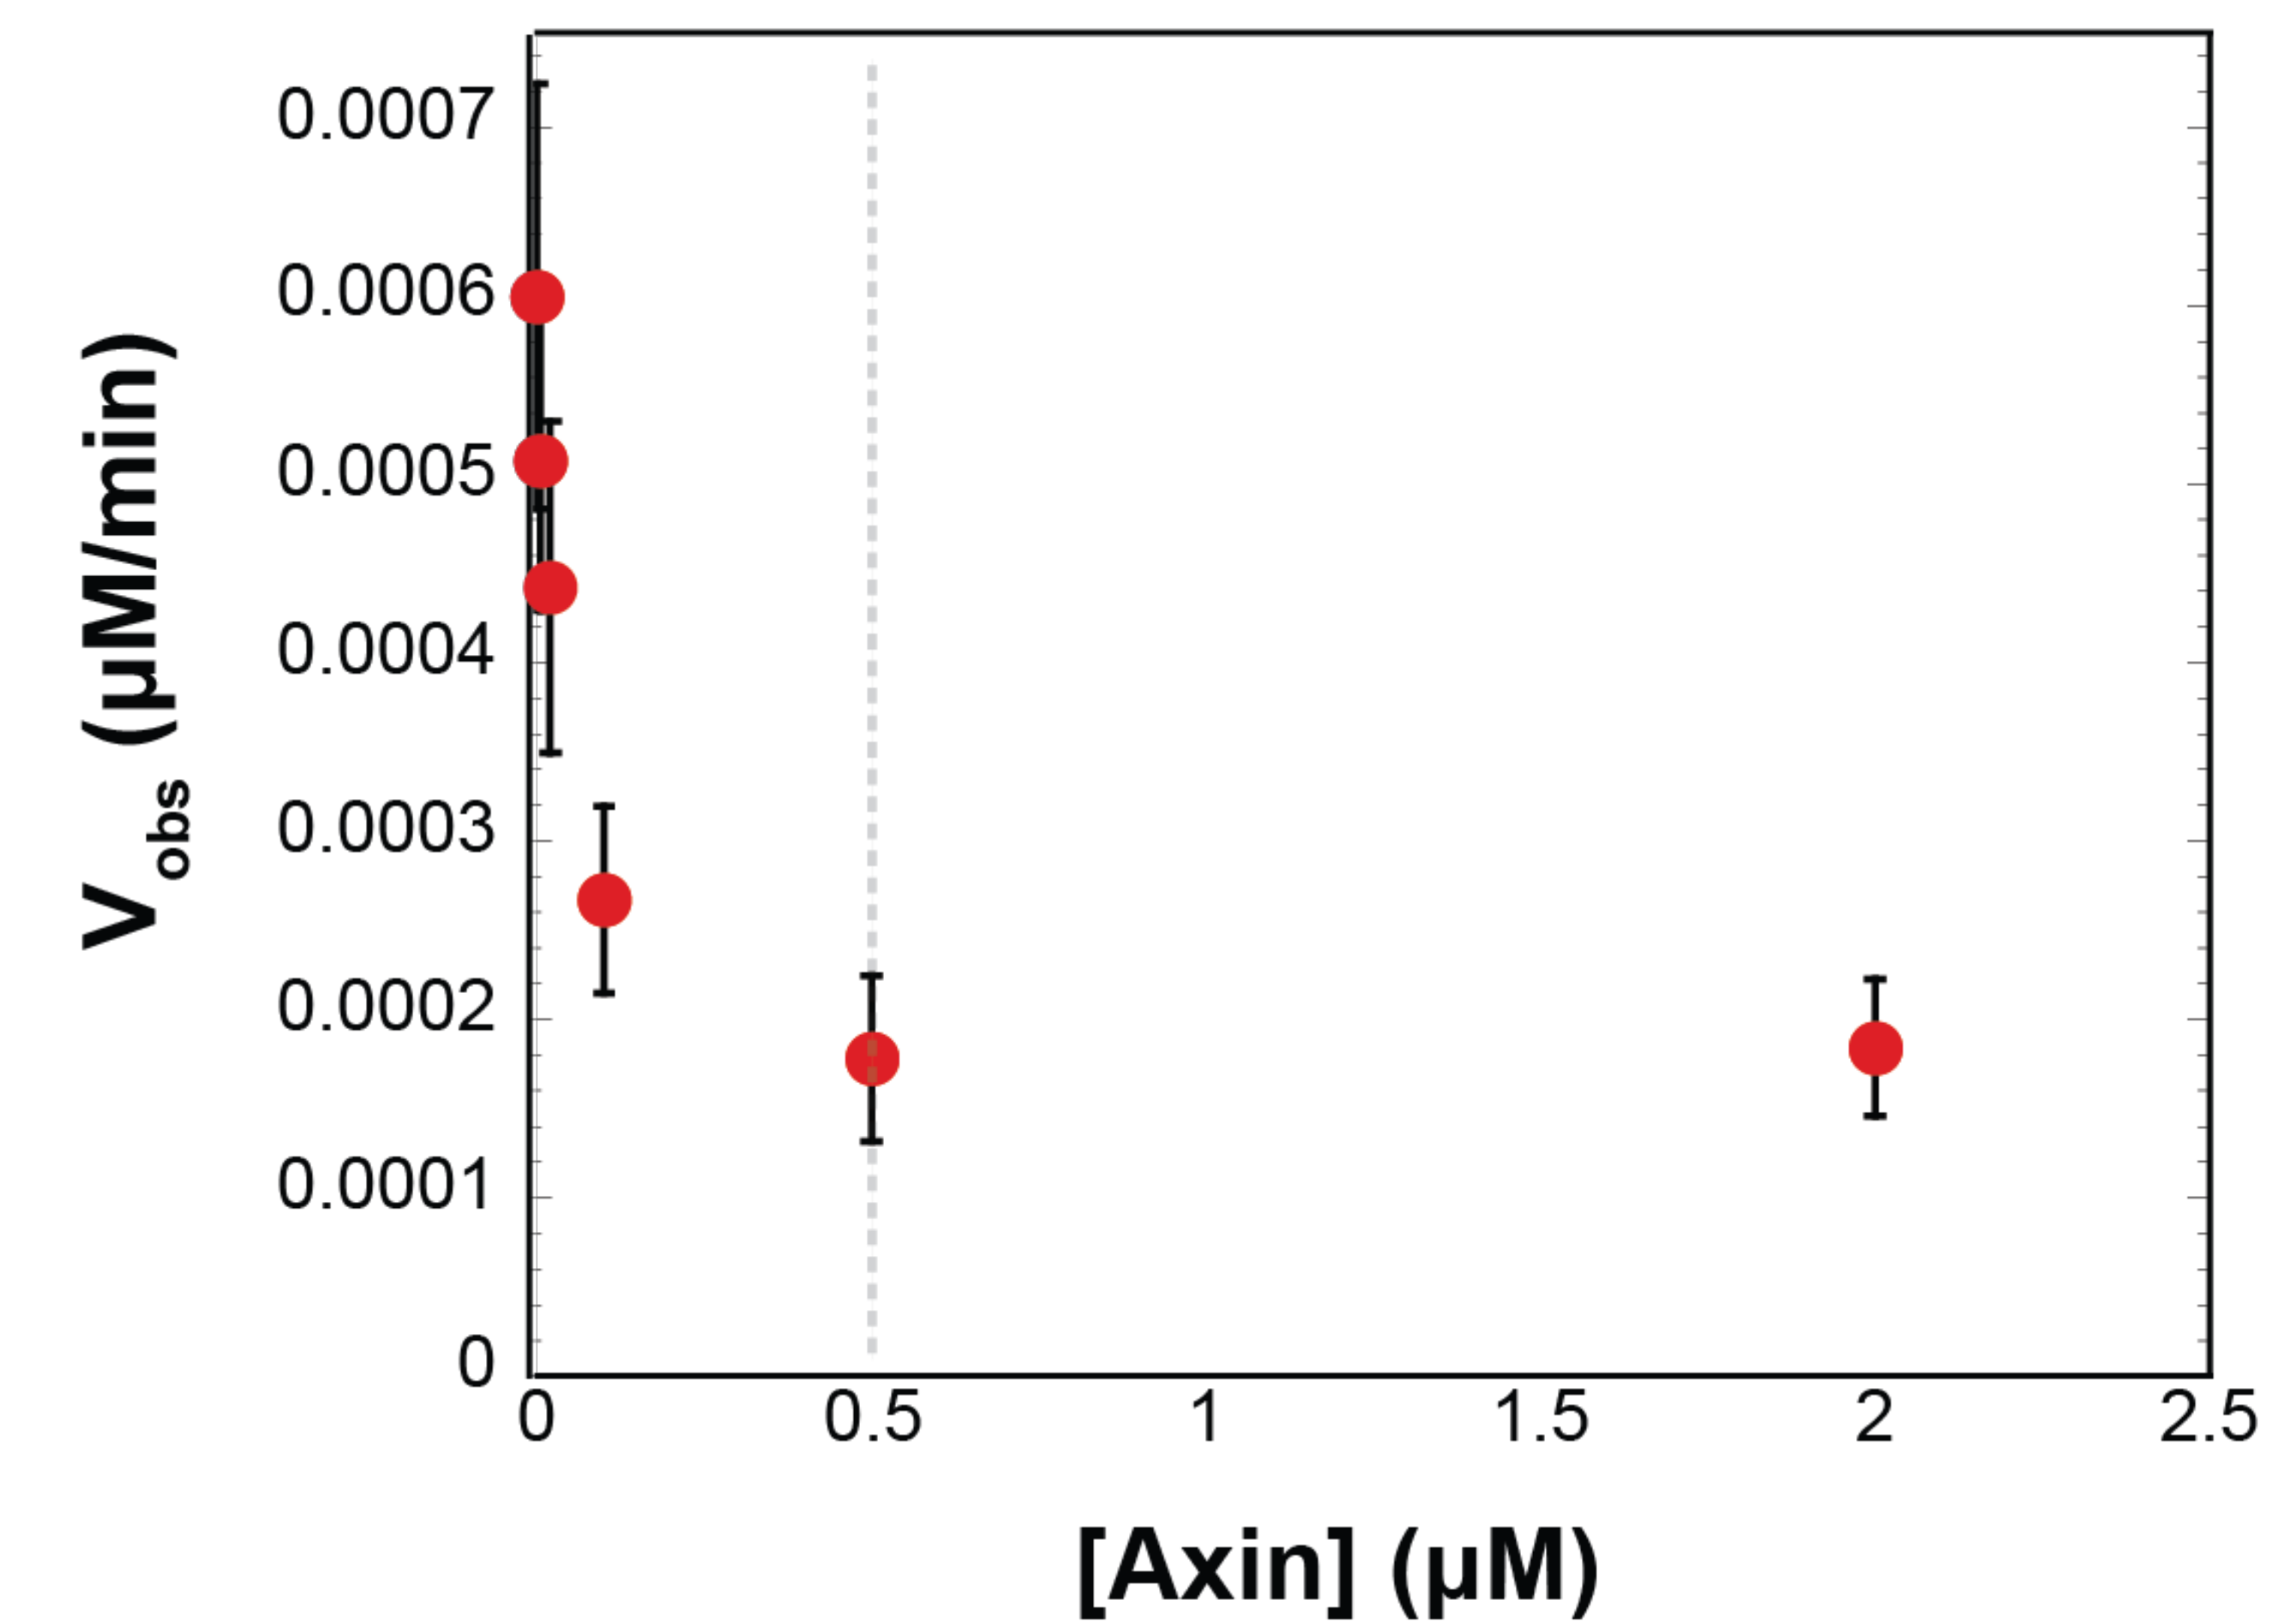

Supplement: supp [file elife-85444-supp-v1.zip]
