# Supplementary material for: The Axin scaffold protects the kinase GSK3β from cross-pathway inhibition
Source: eLife journal article supplement (doi:10.7554/elife.85444), 2023-08-07

**A)**

**Full length Axin**

MBP-Axin<sub>1-826</sub>-His<sub>6</sub>

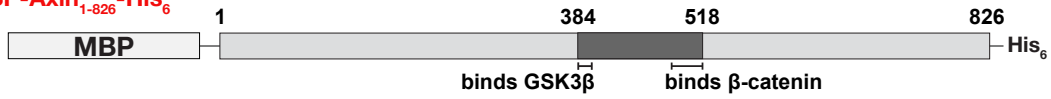

**miniAxin**

MBP-Axin<sub>384-518</sub>-His<sub>6</sub>

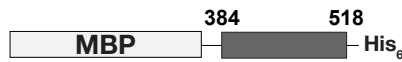

**Axin peptide**

Axin<sub>381-407</sub>-His<sub>6</sub>

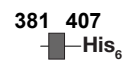

**B)**

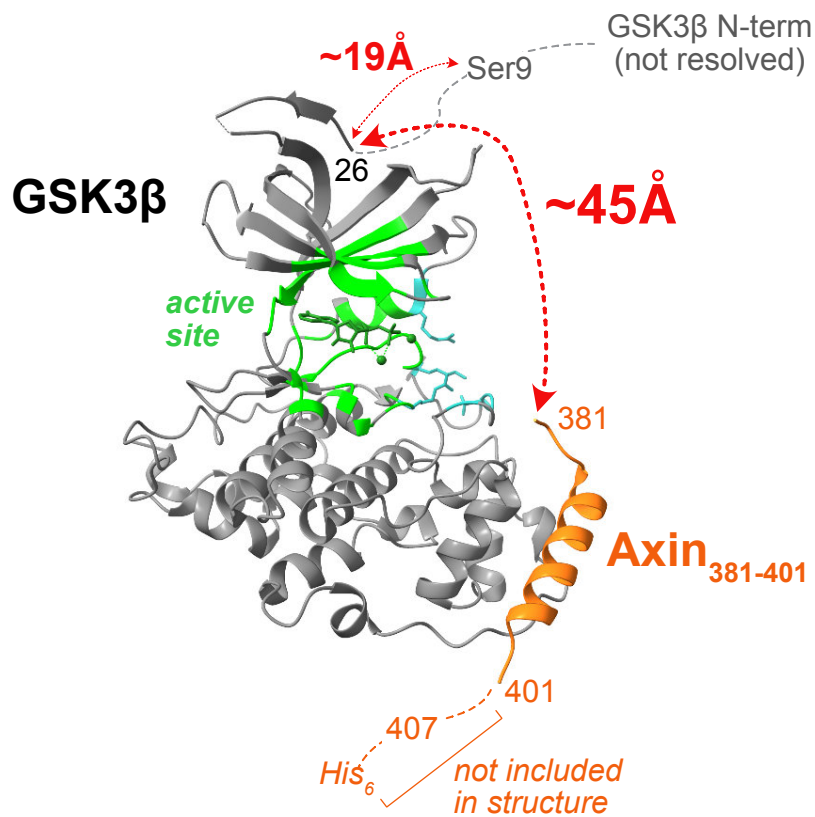

Supplement: supp [file elife-85444-supp-v1.zip]
