# Supplementary material for: The Axin scaffold protects the kinase GSK3β from cross-pathway inhibition
Source: eLife journal article supplement (doi:10.7554/elife.85444), 2023-08-07
Supplement: supp [file elife-85444-supp-v1.zip]

Endpt (50nM)  
MW ladder

rxn rxn rxn  
10 30 60 90 10 30 60 90 10 30 60 90

Endpt (50nM)

### 15-well gel layout

*rxn timepoints: 10, 30, 60, 90 seconds*

Replicate 1

Replicate 2

-Axin

-Axin

+Axin\_FL

+Axin\_FL

-Axin

-Axin

+Axin\_FL

+Axin\_FL

-Axin

-Axin

+Axin\_FL

+Axin\_FL

Replicate 3
