# Supplementary figures and images for: The Axin scaffold protects the kinase GSK3β from cross-pathway inhibition
Source: eLife journal article supplement (doi:10.7554/elife.85444), 2023-08-07

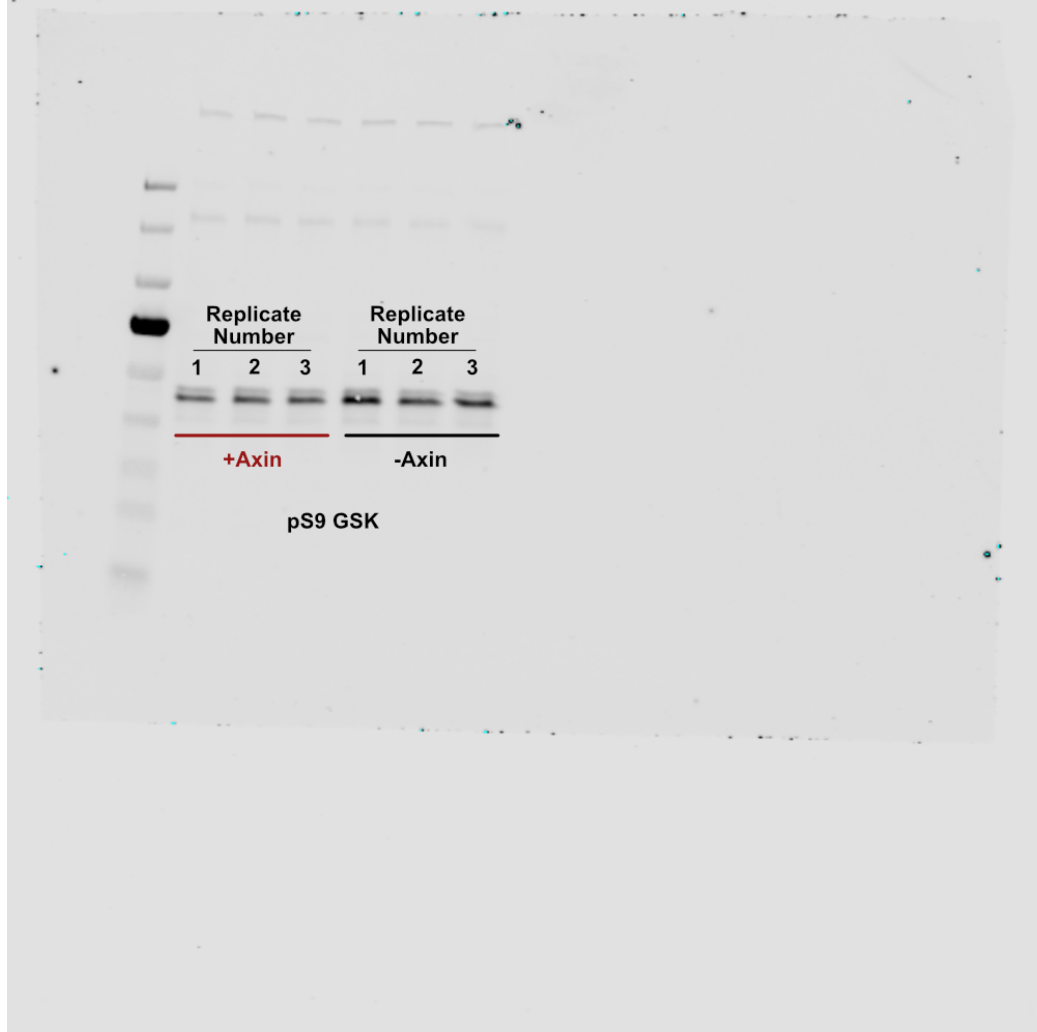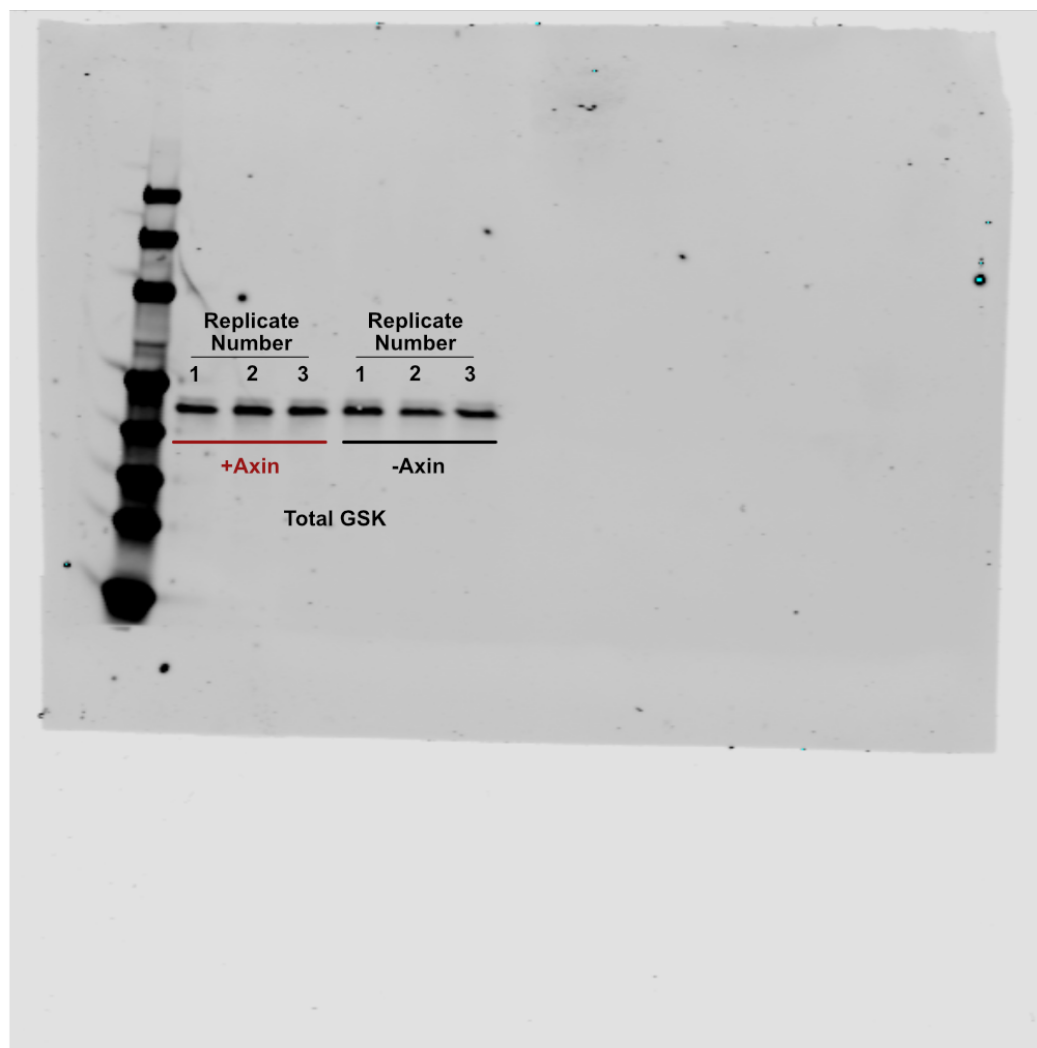

Supplement: supp [file elife-85444-supp-v1.zip]

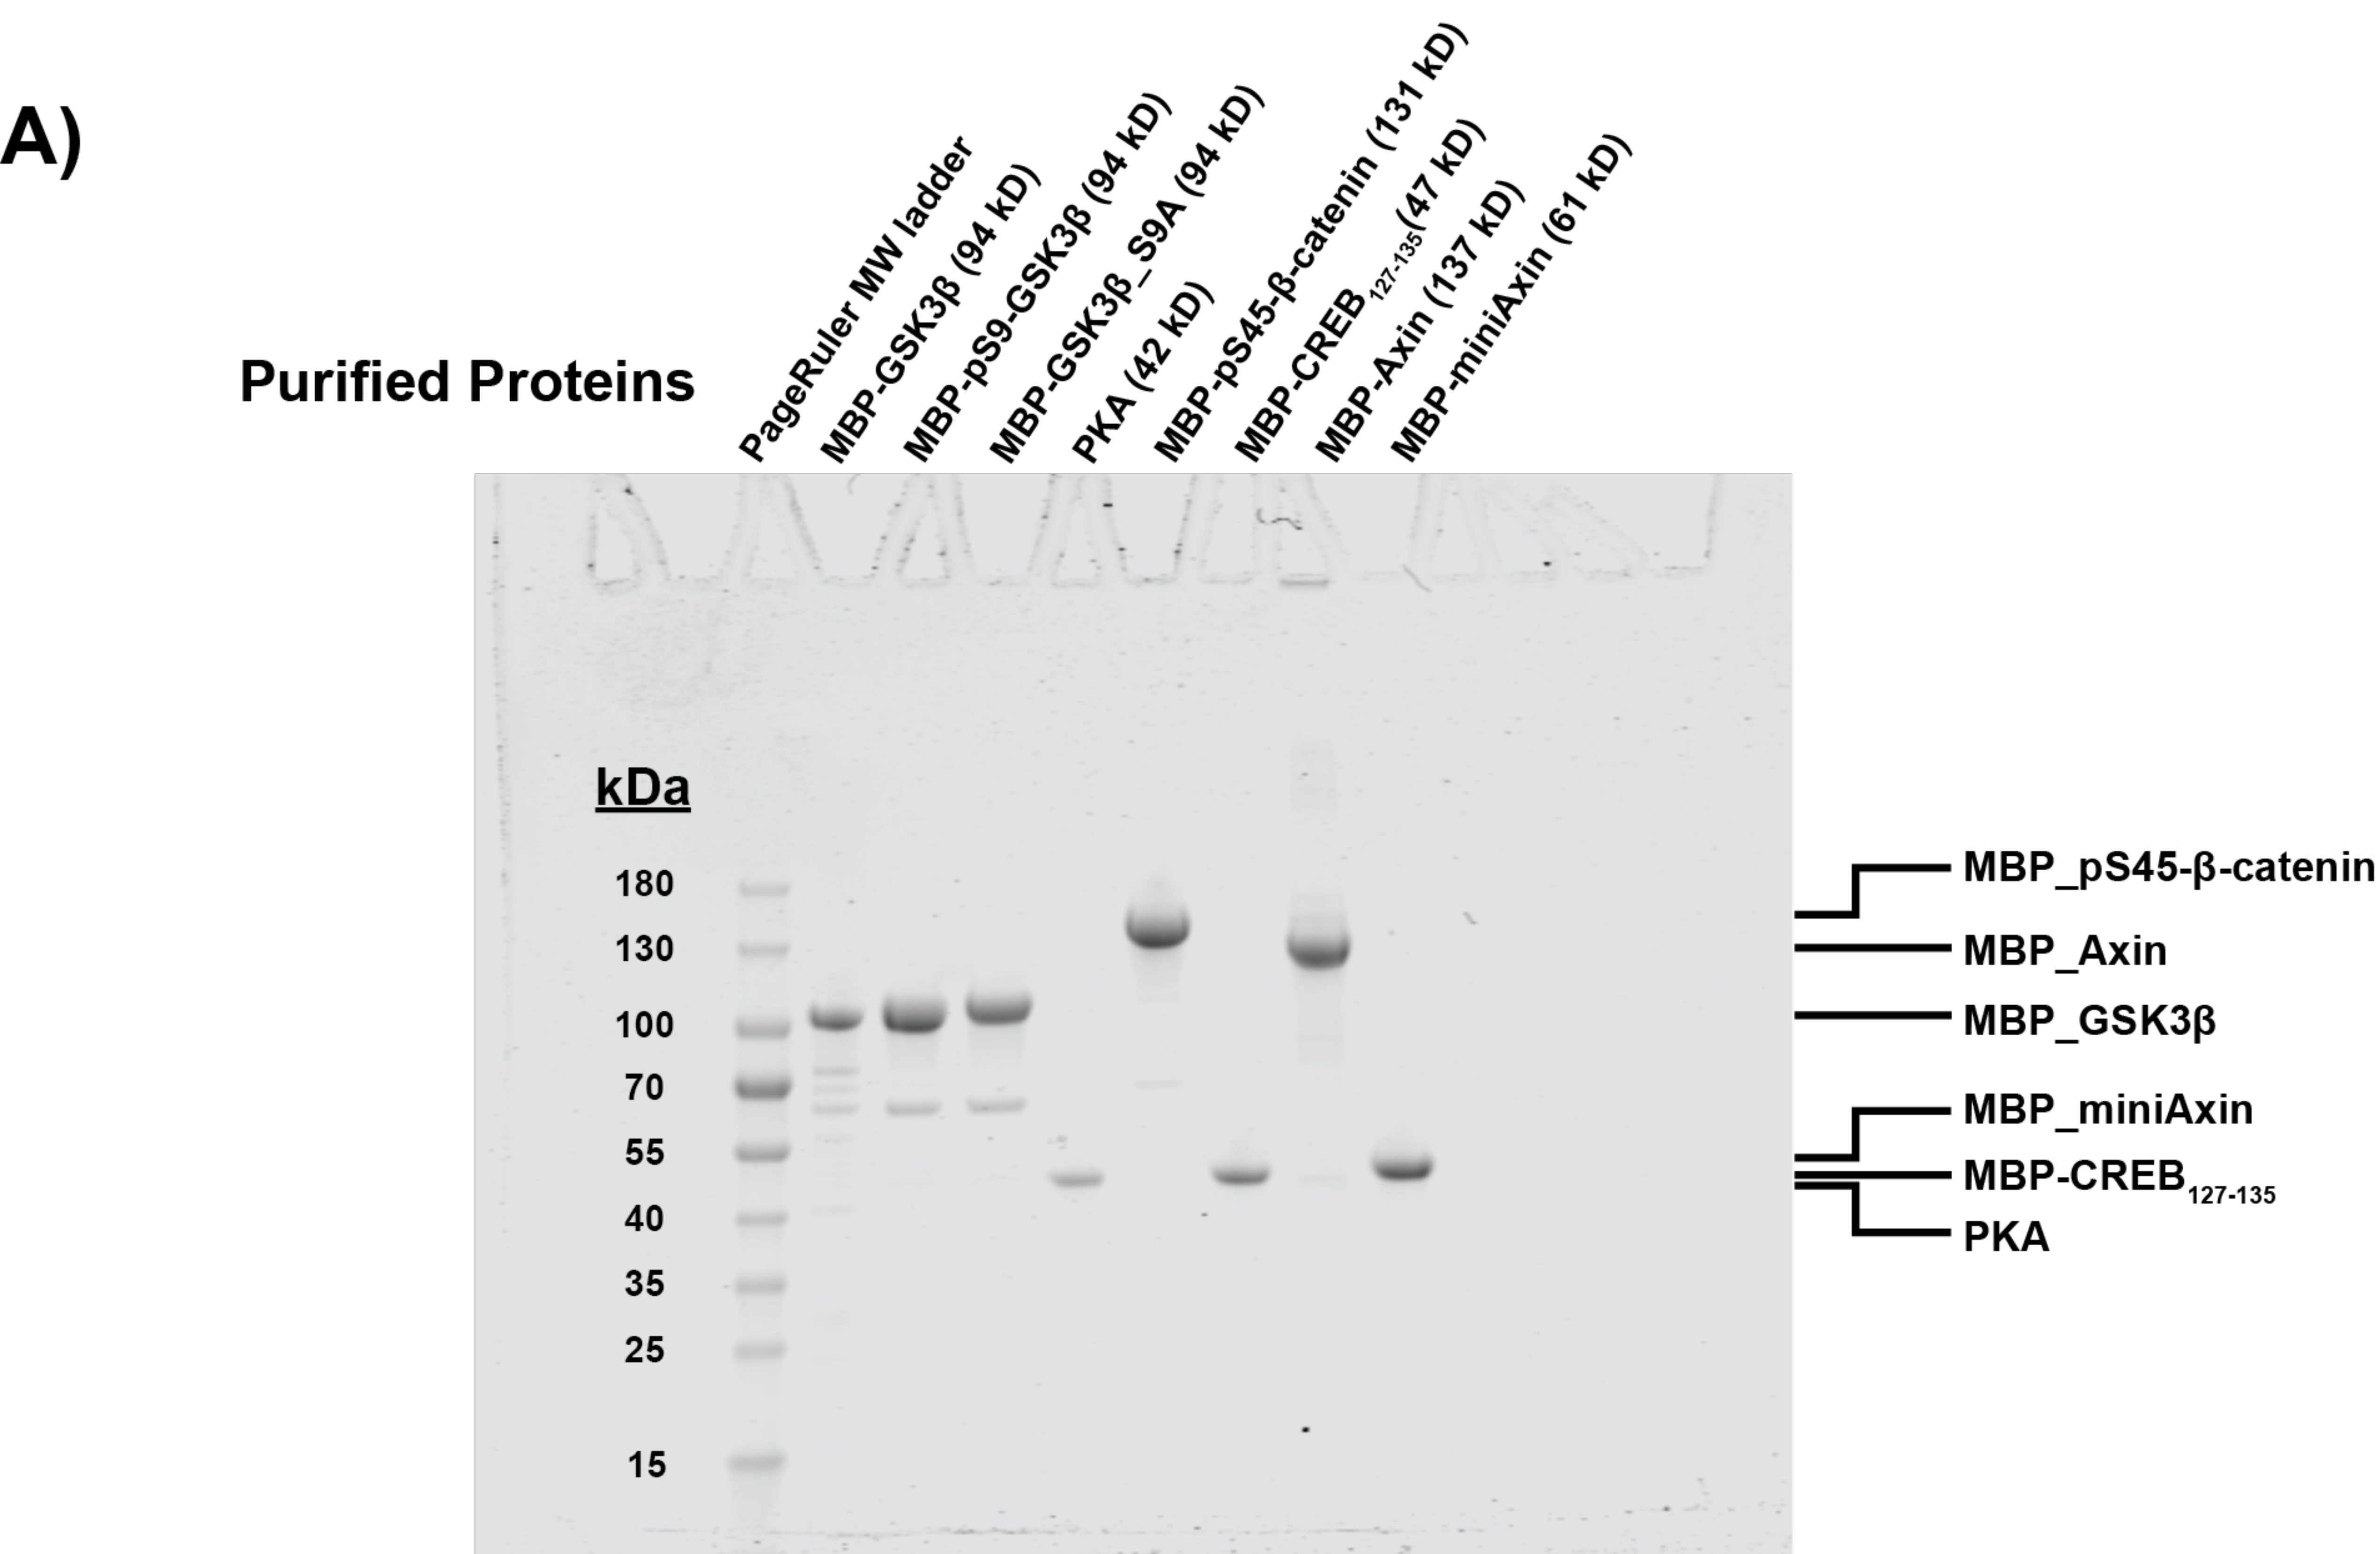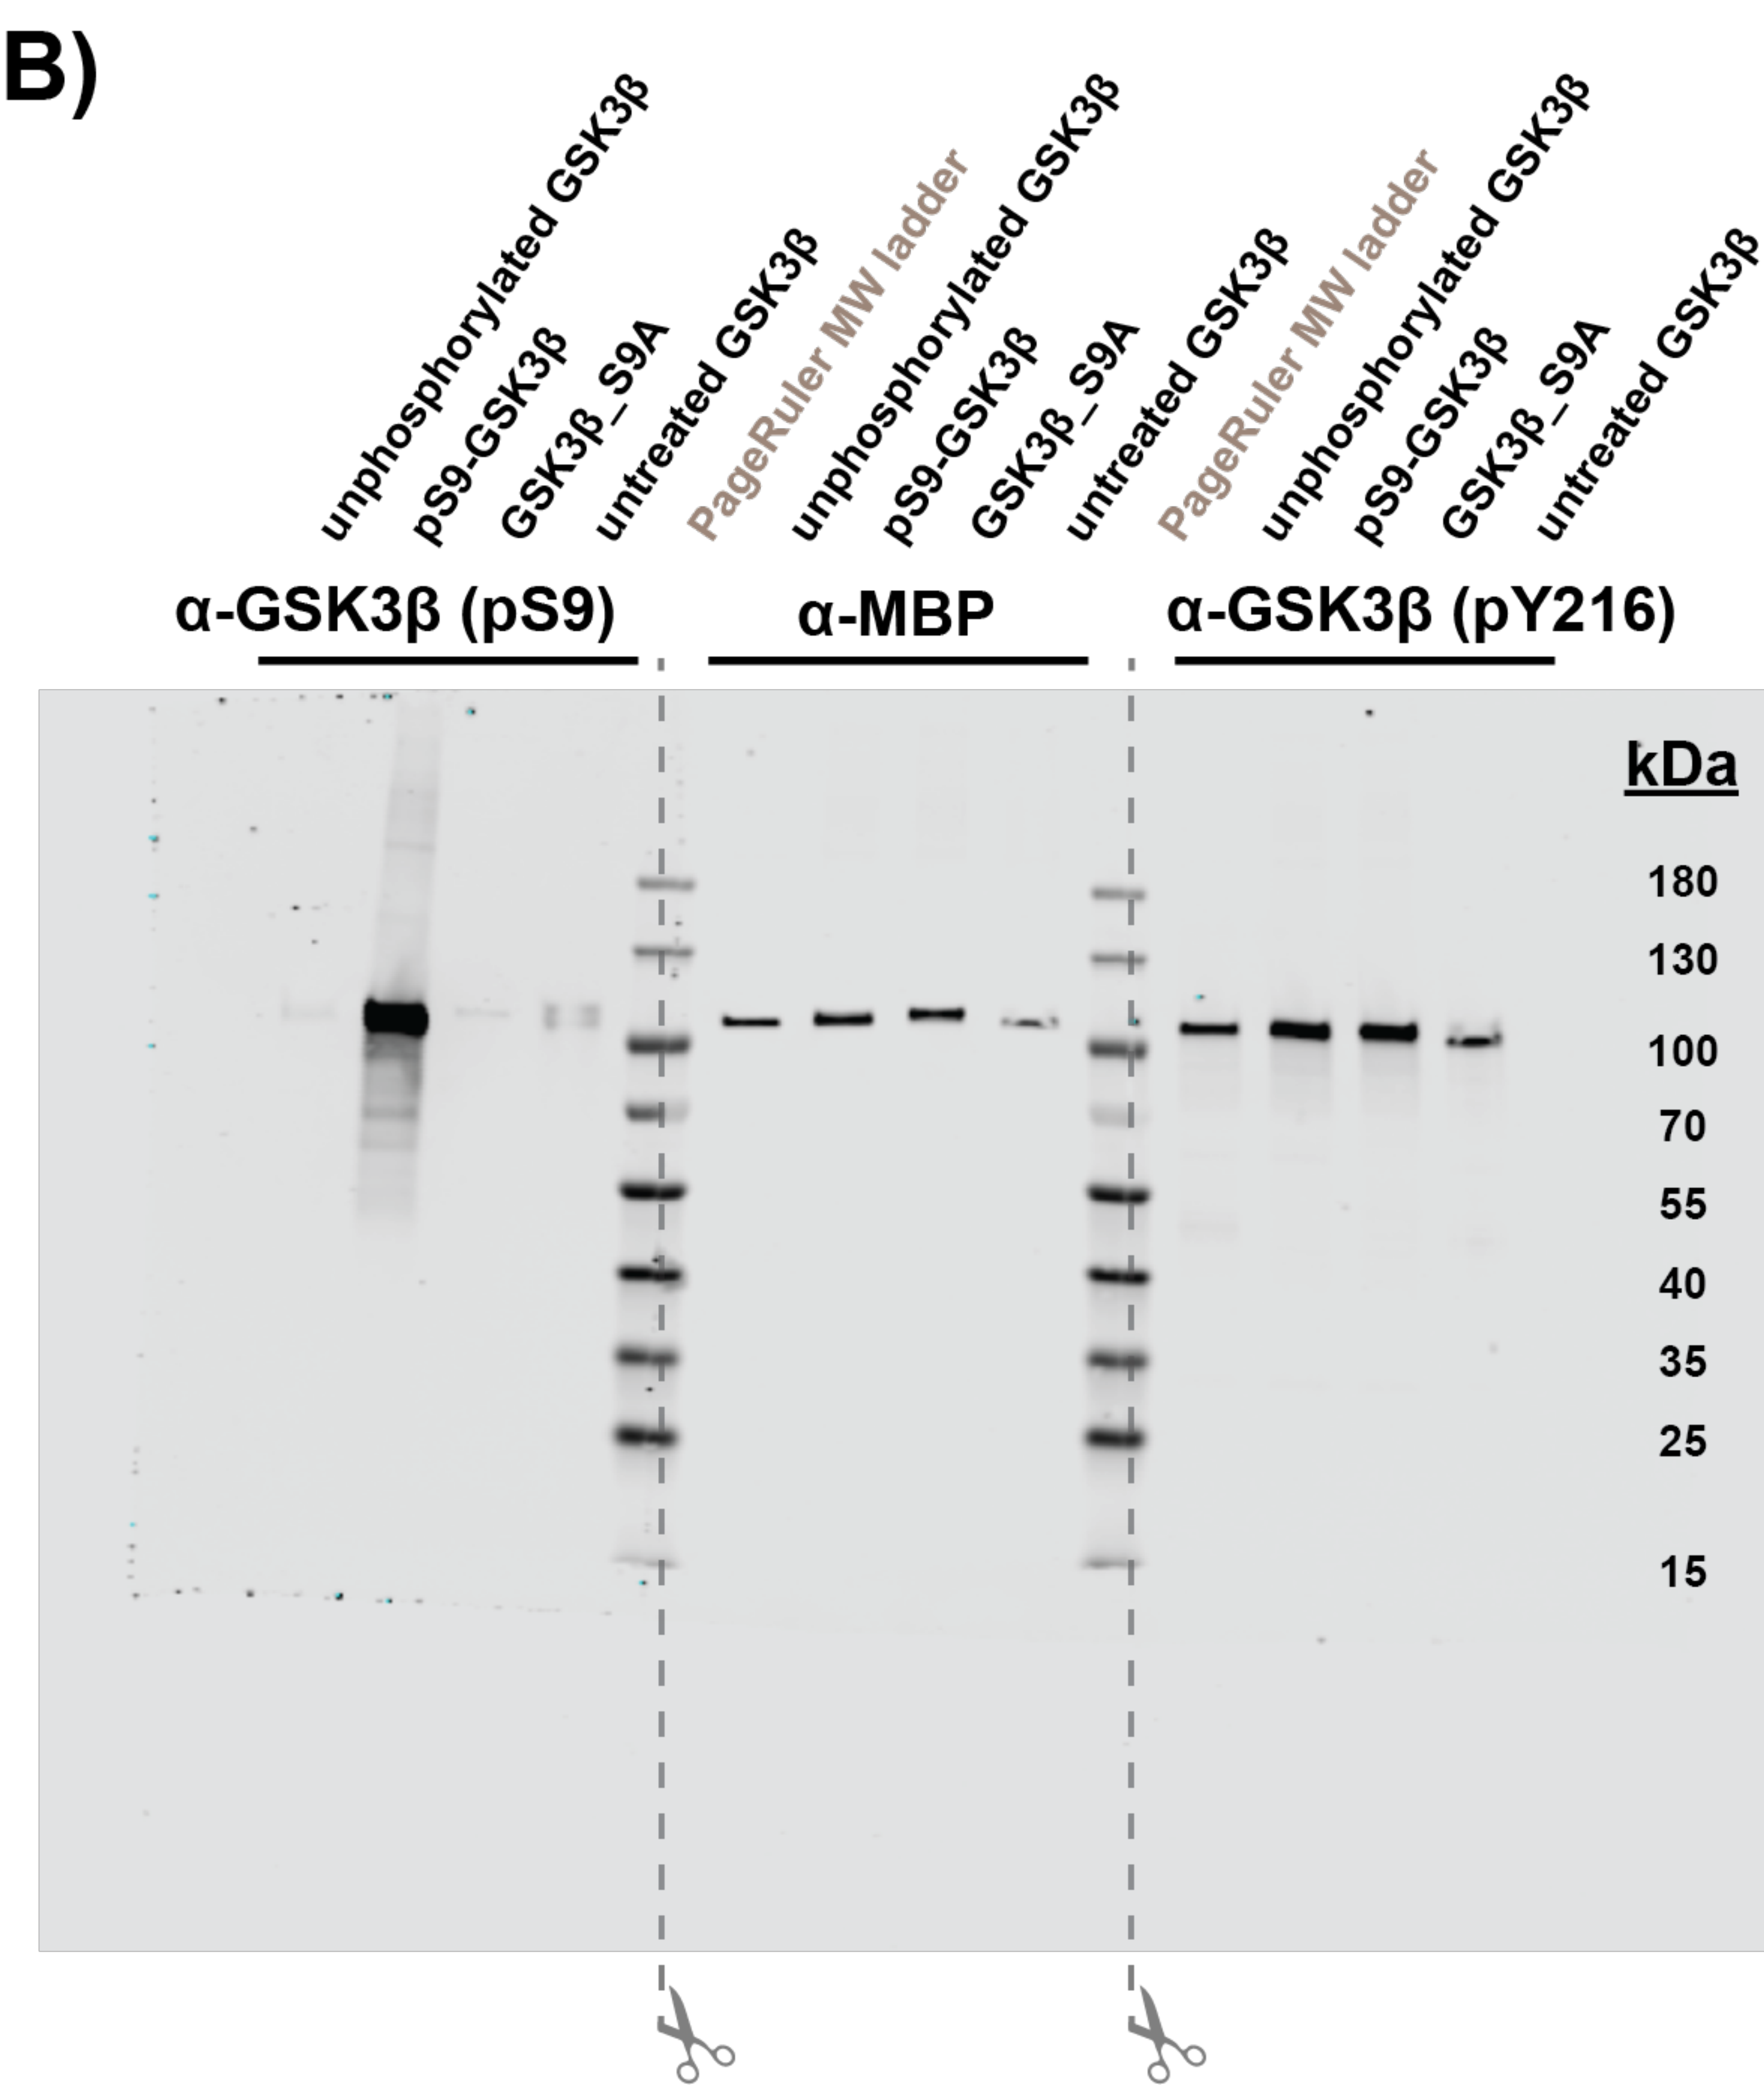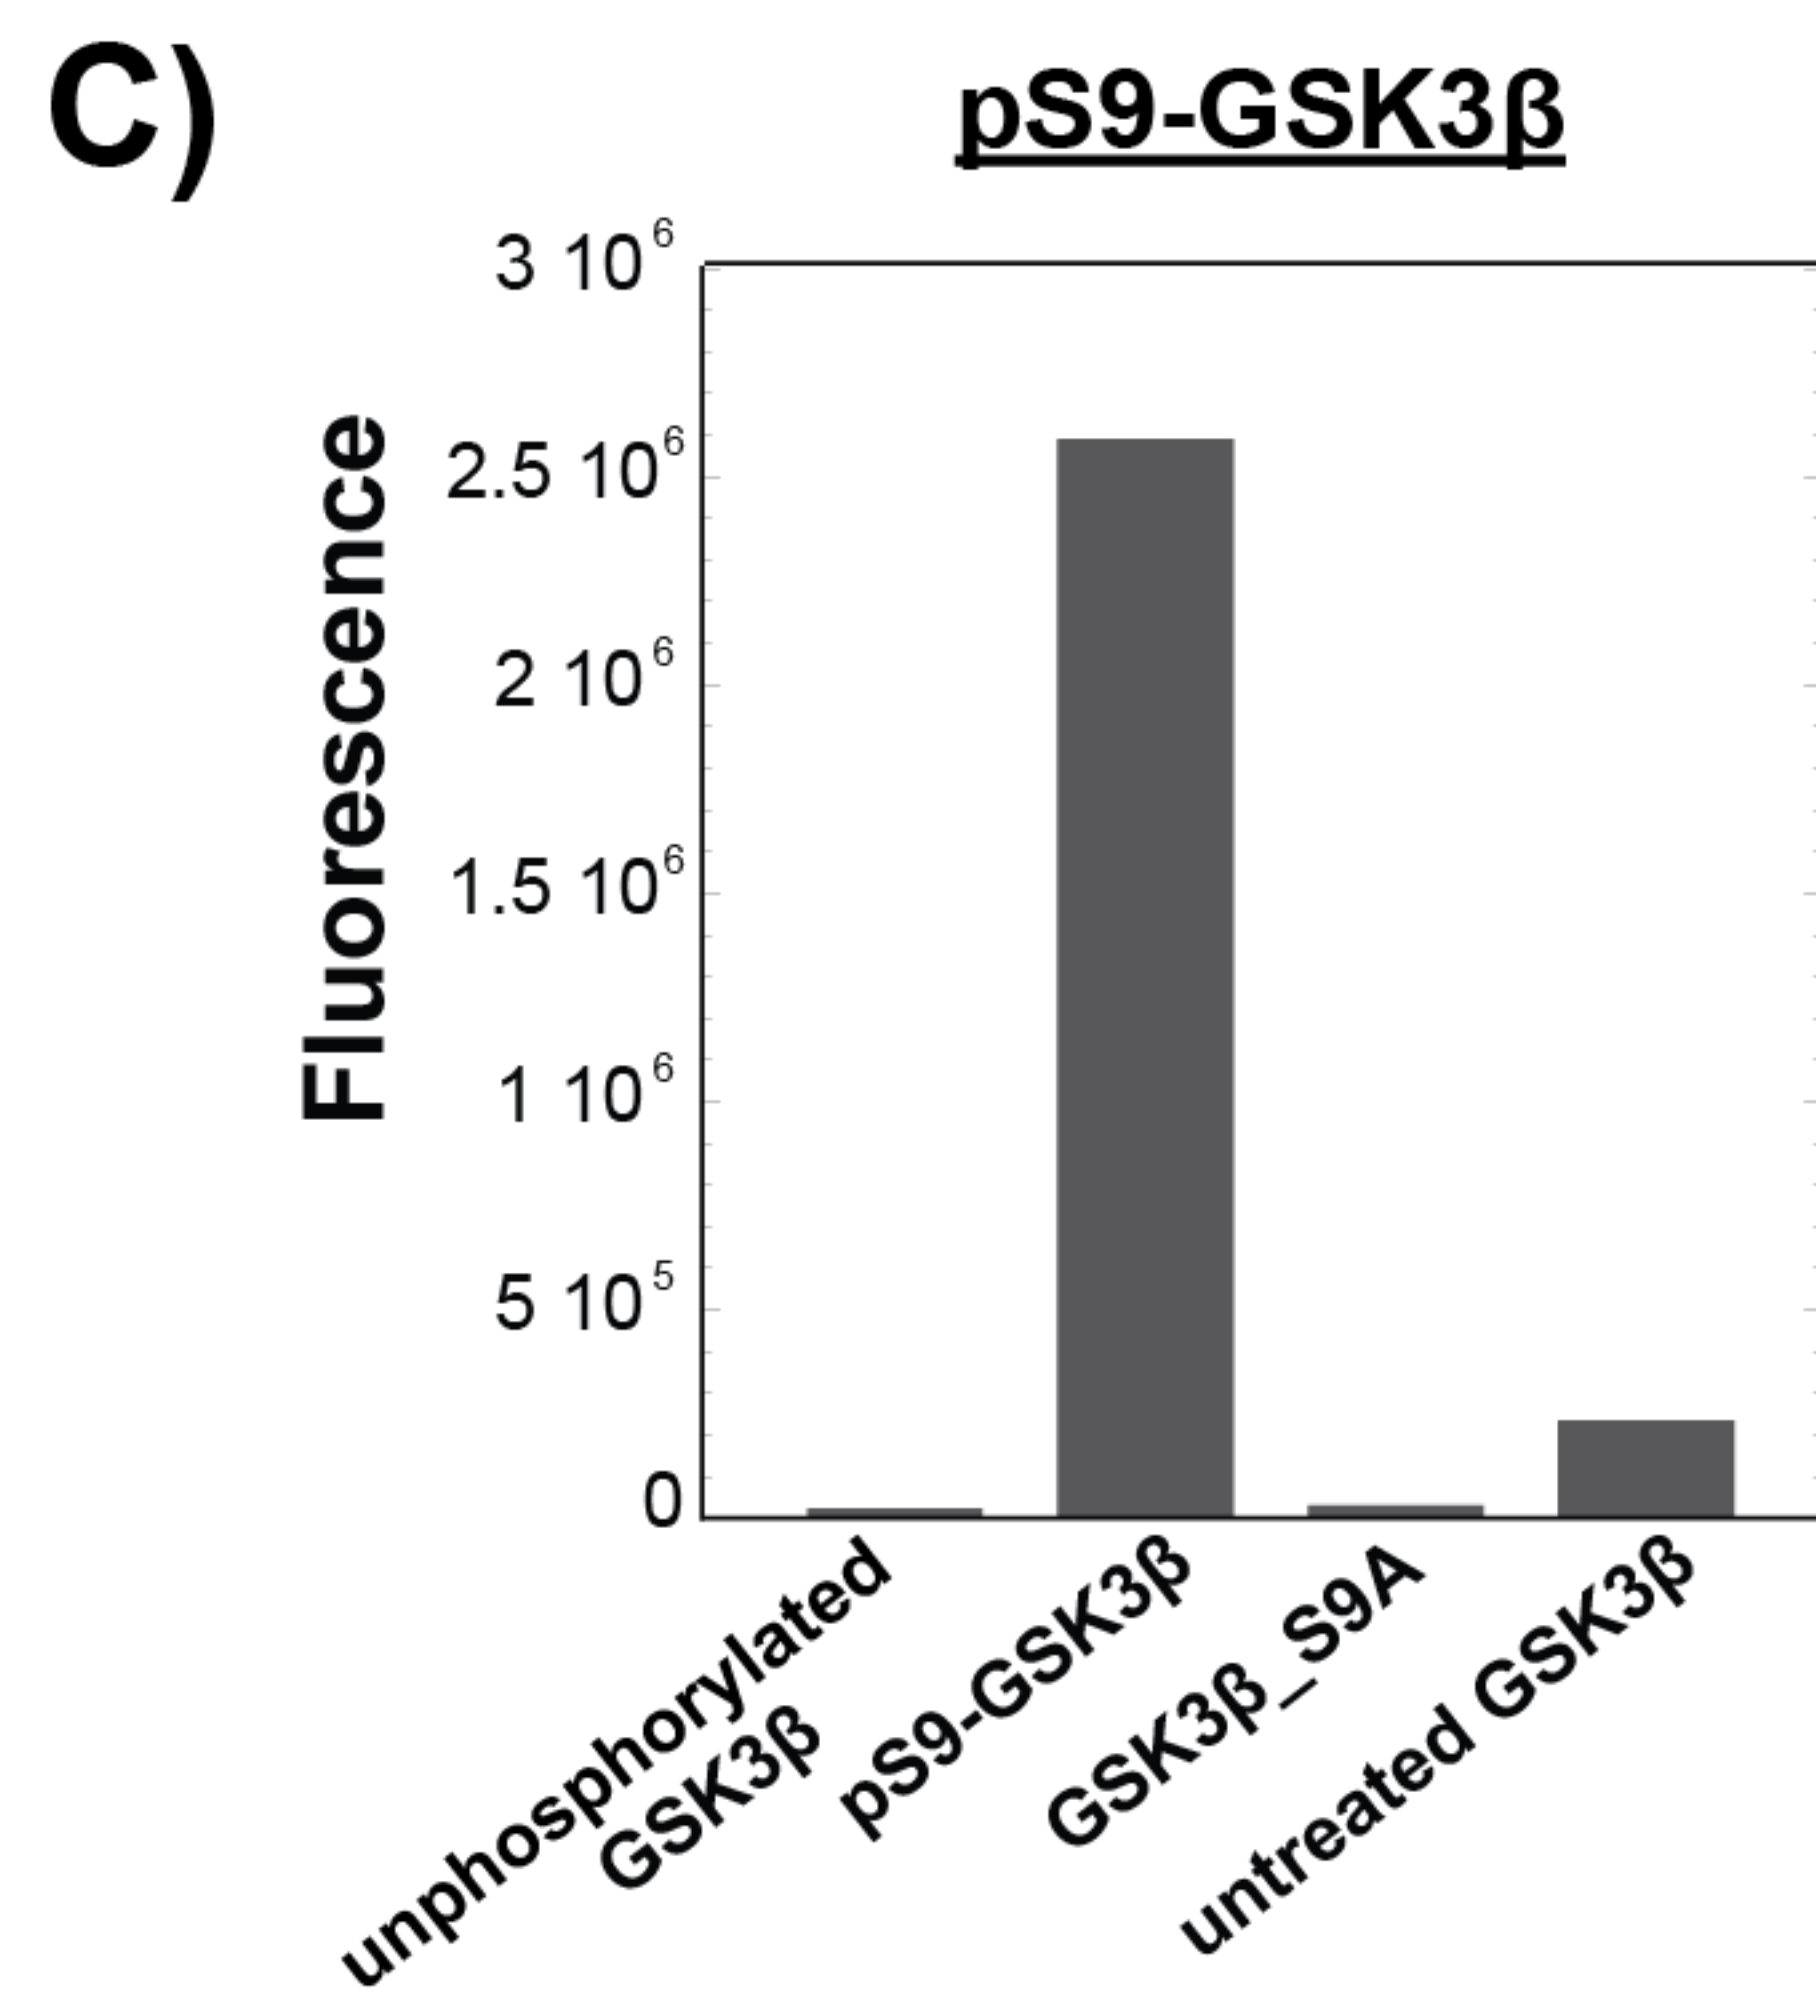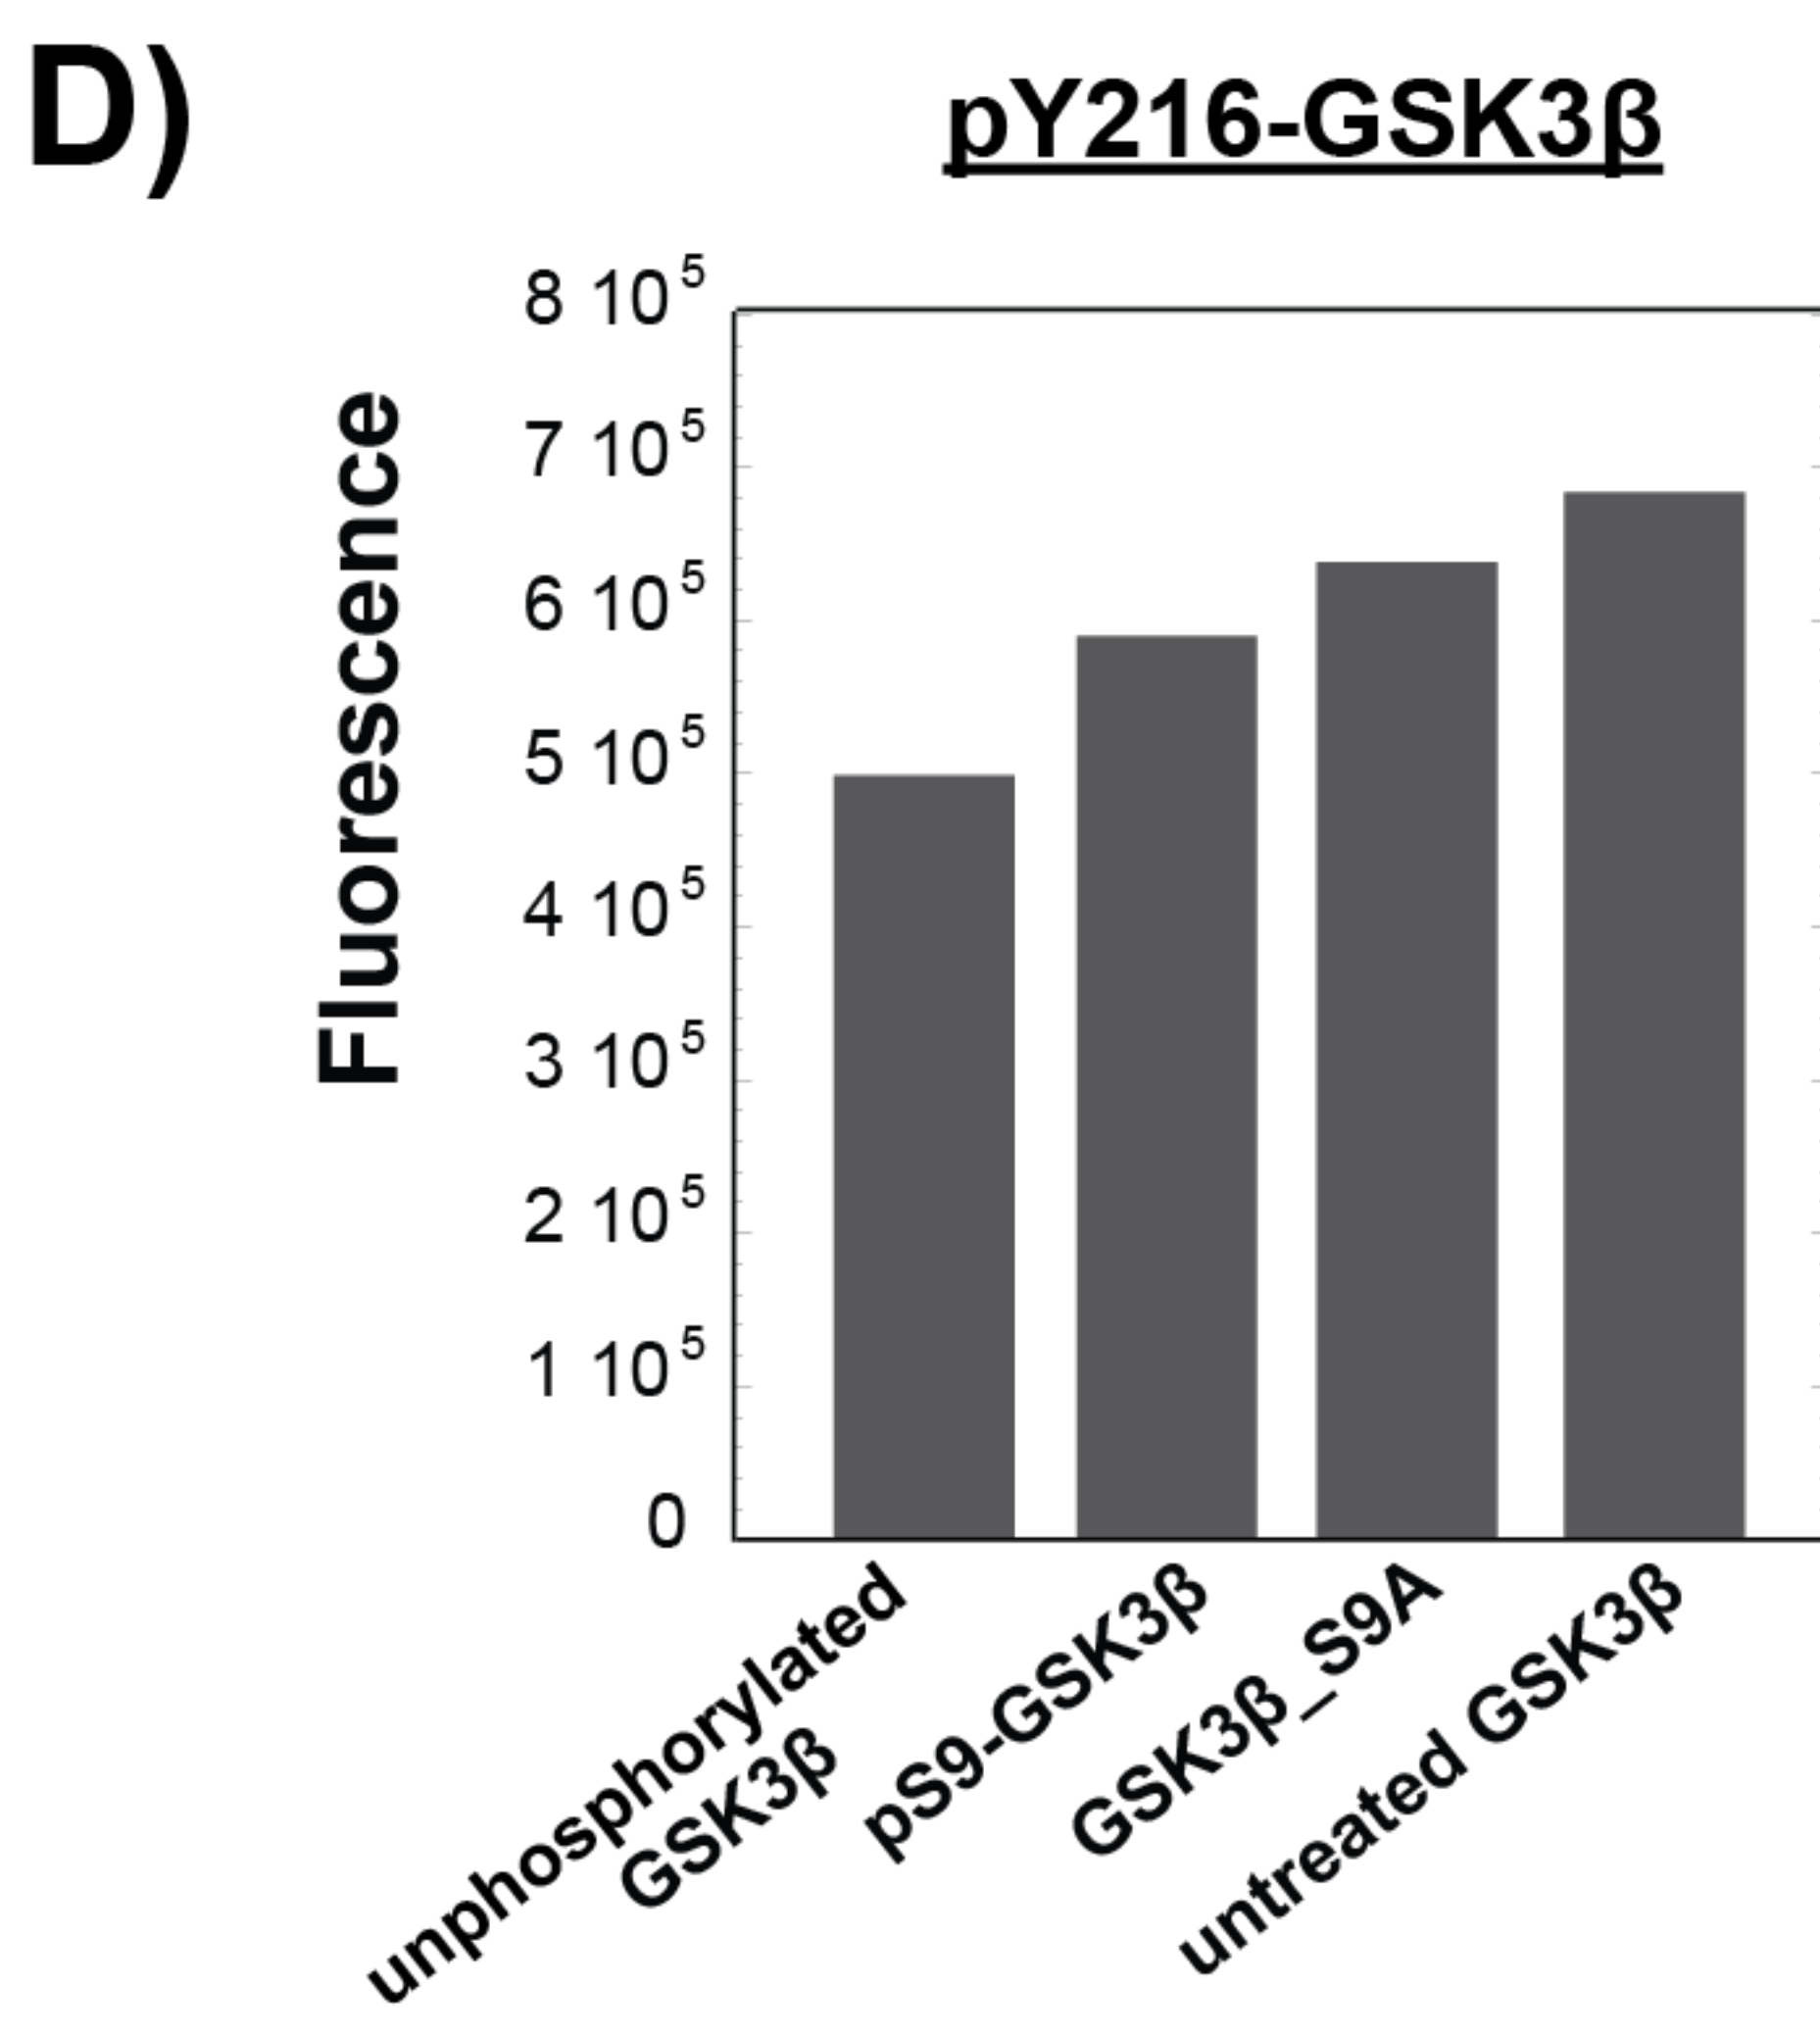

Supplement: supp [file elife-85444-supp-v1.zip]

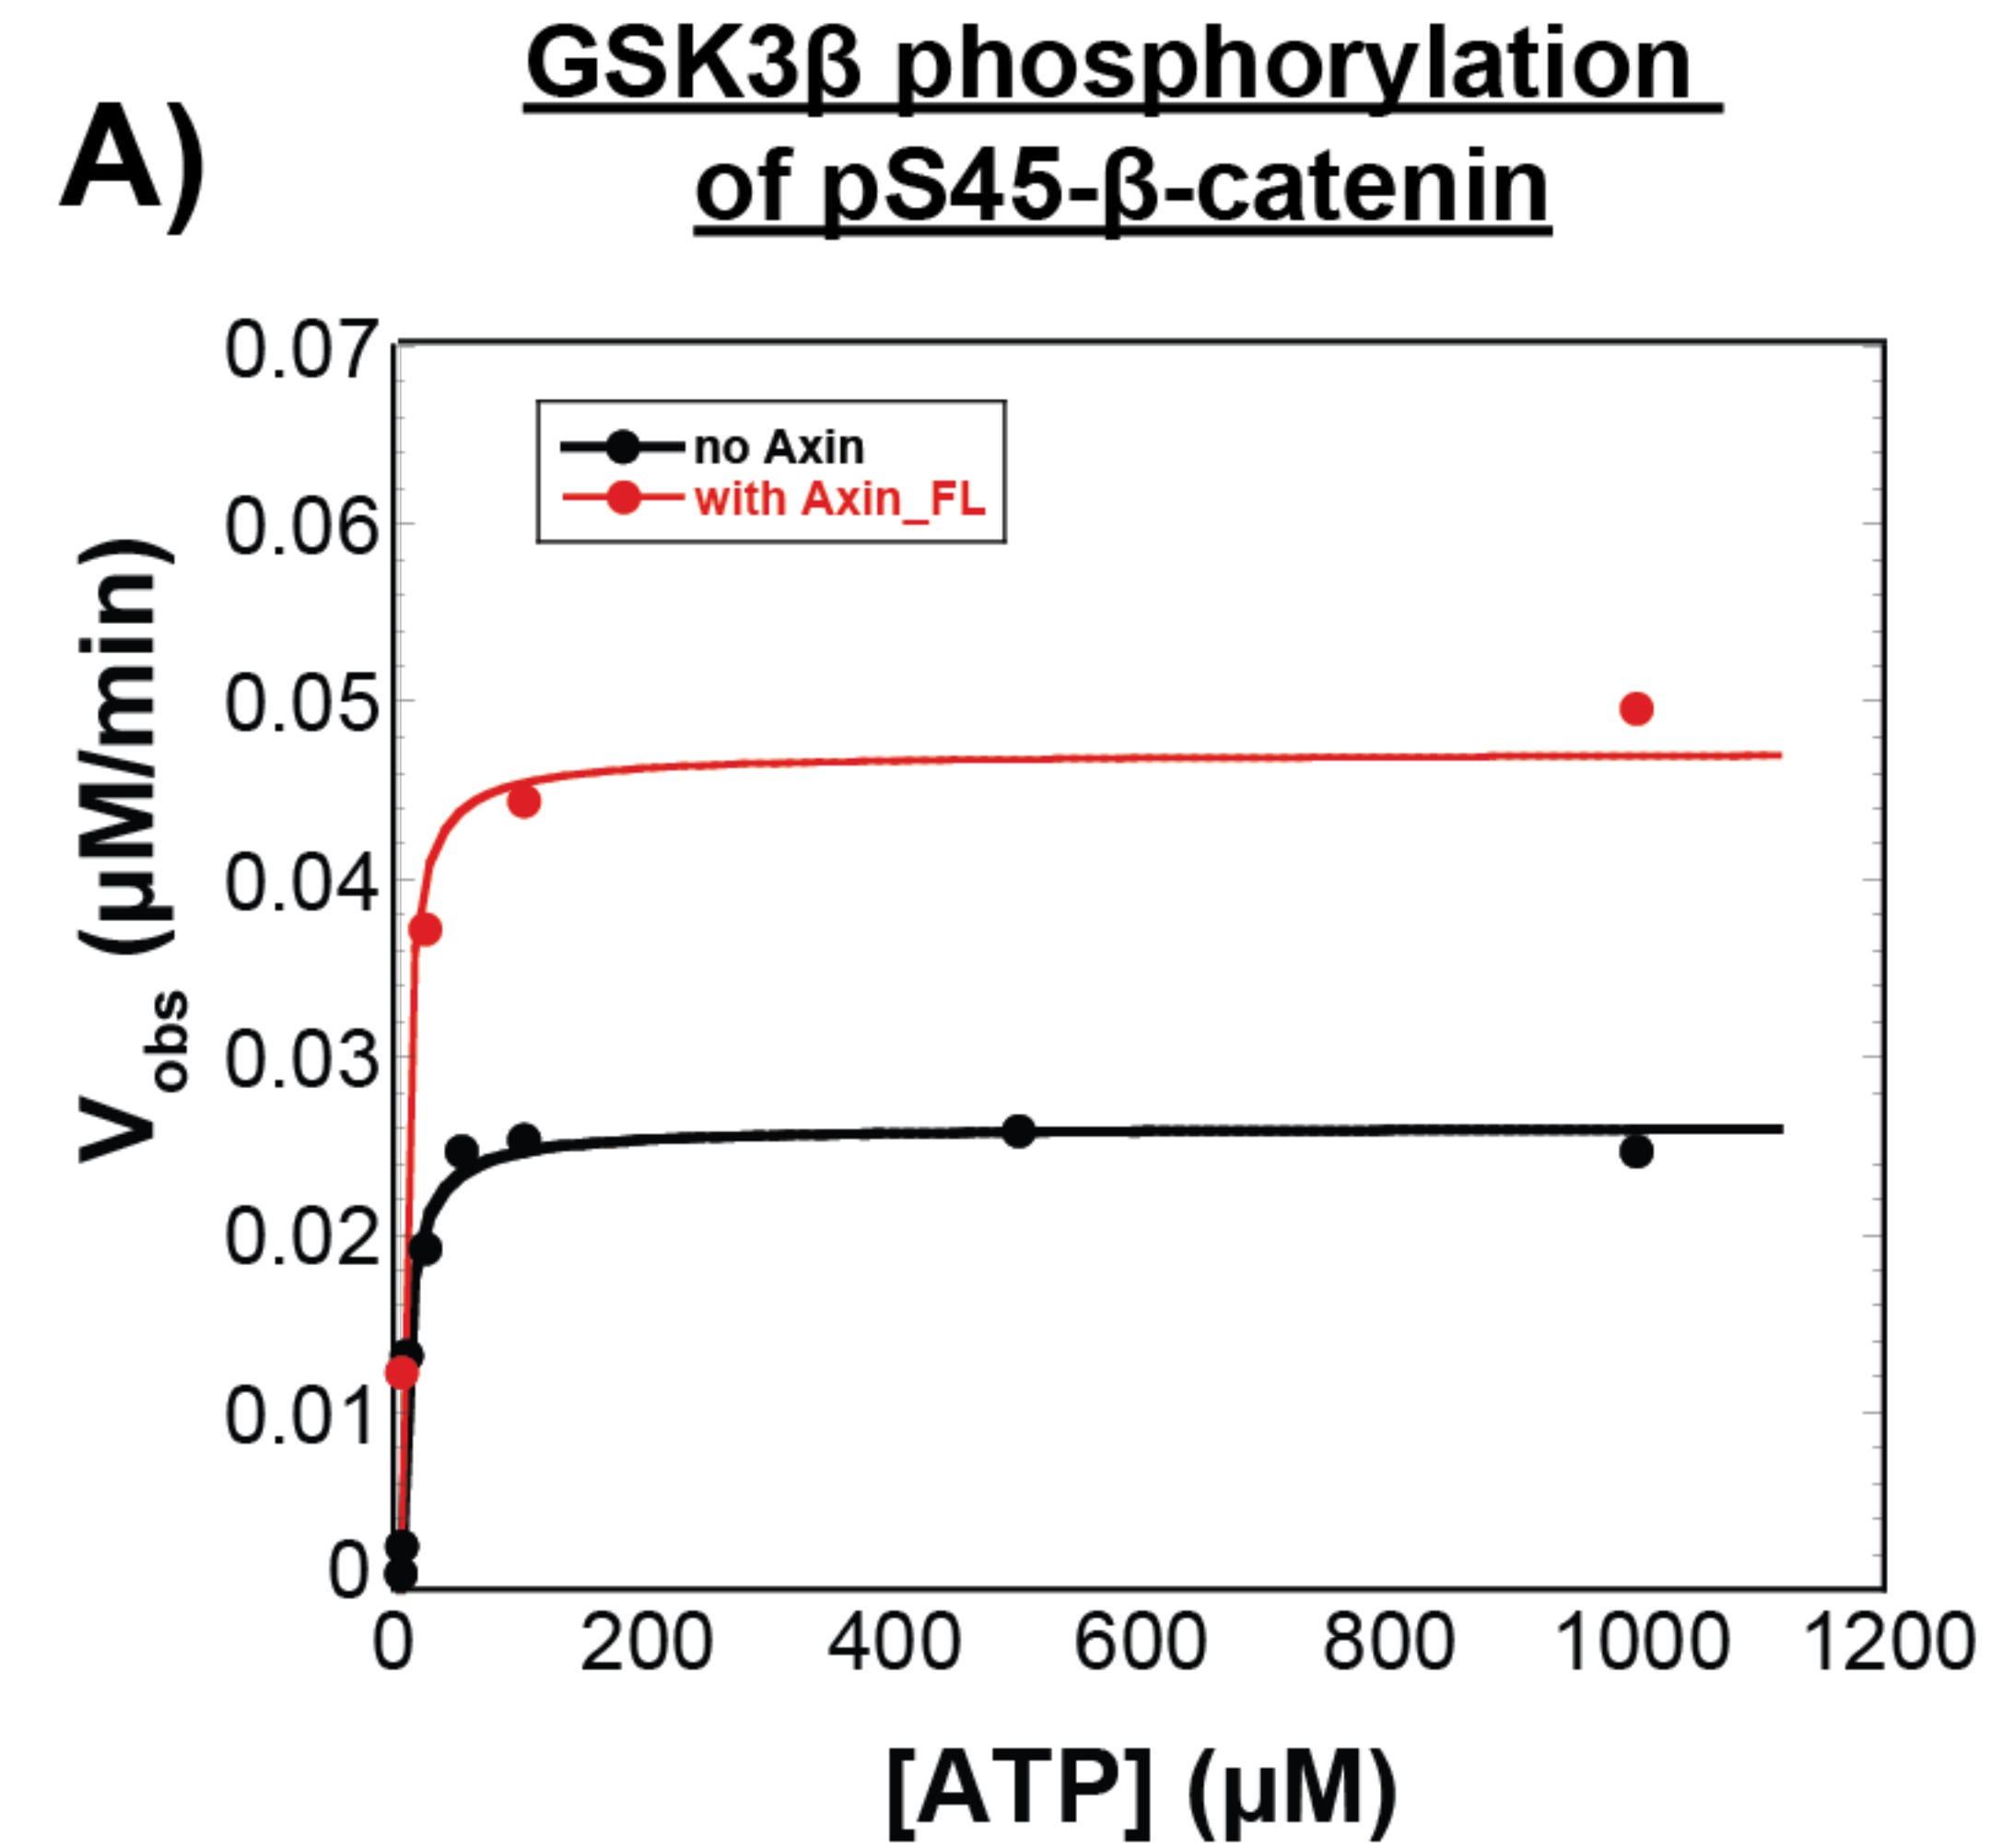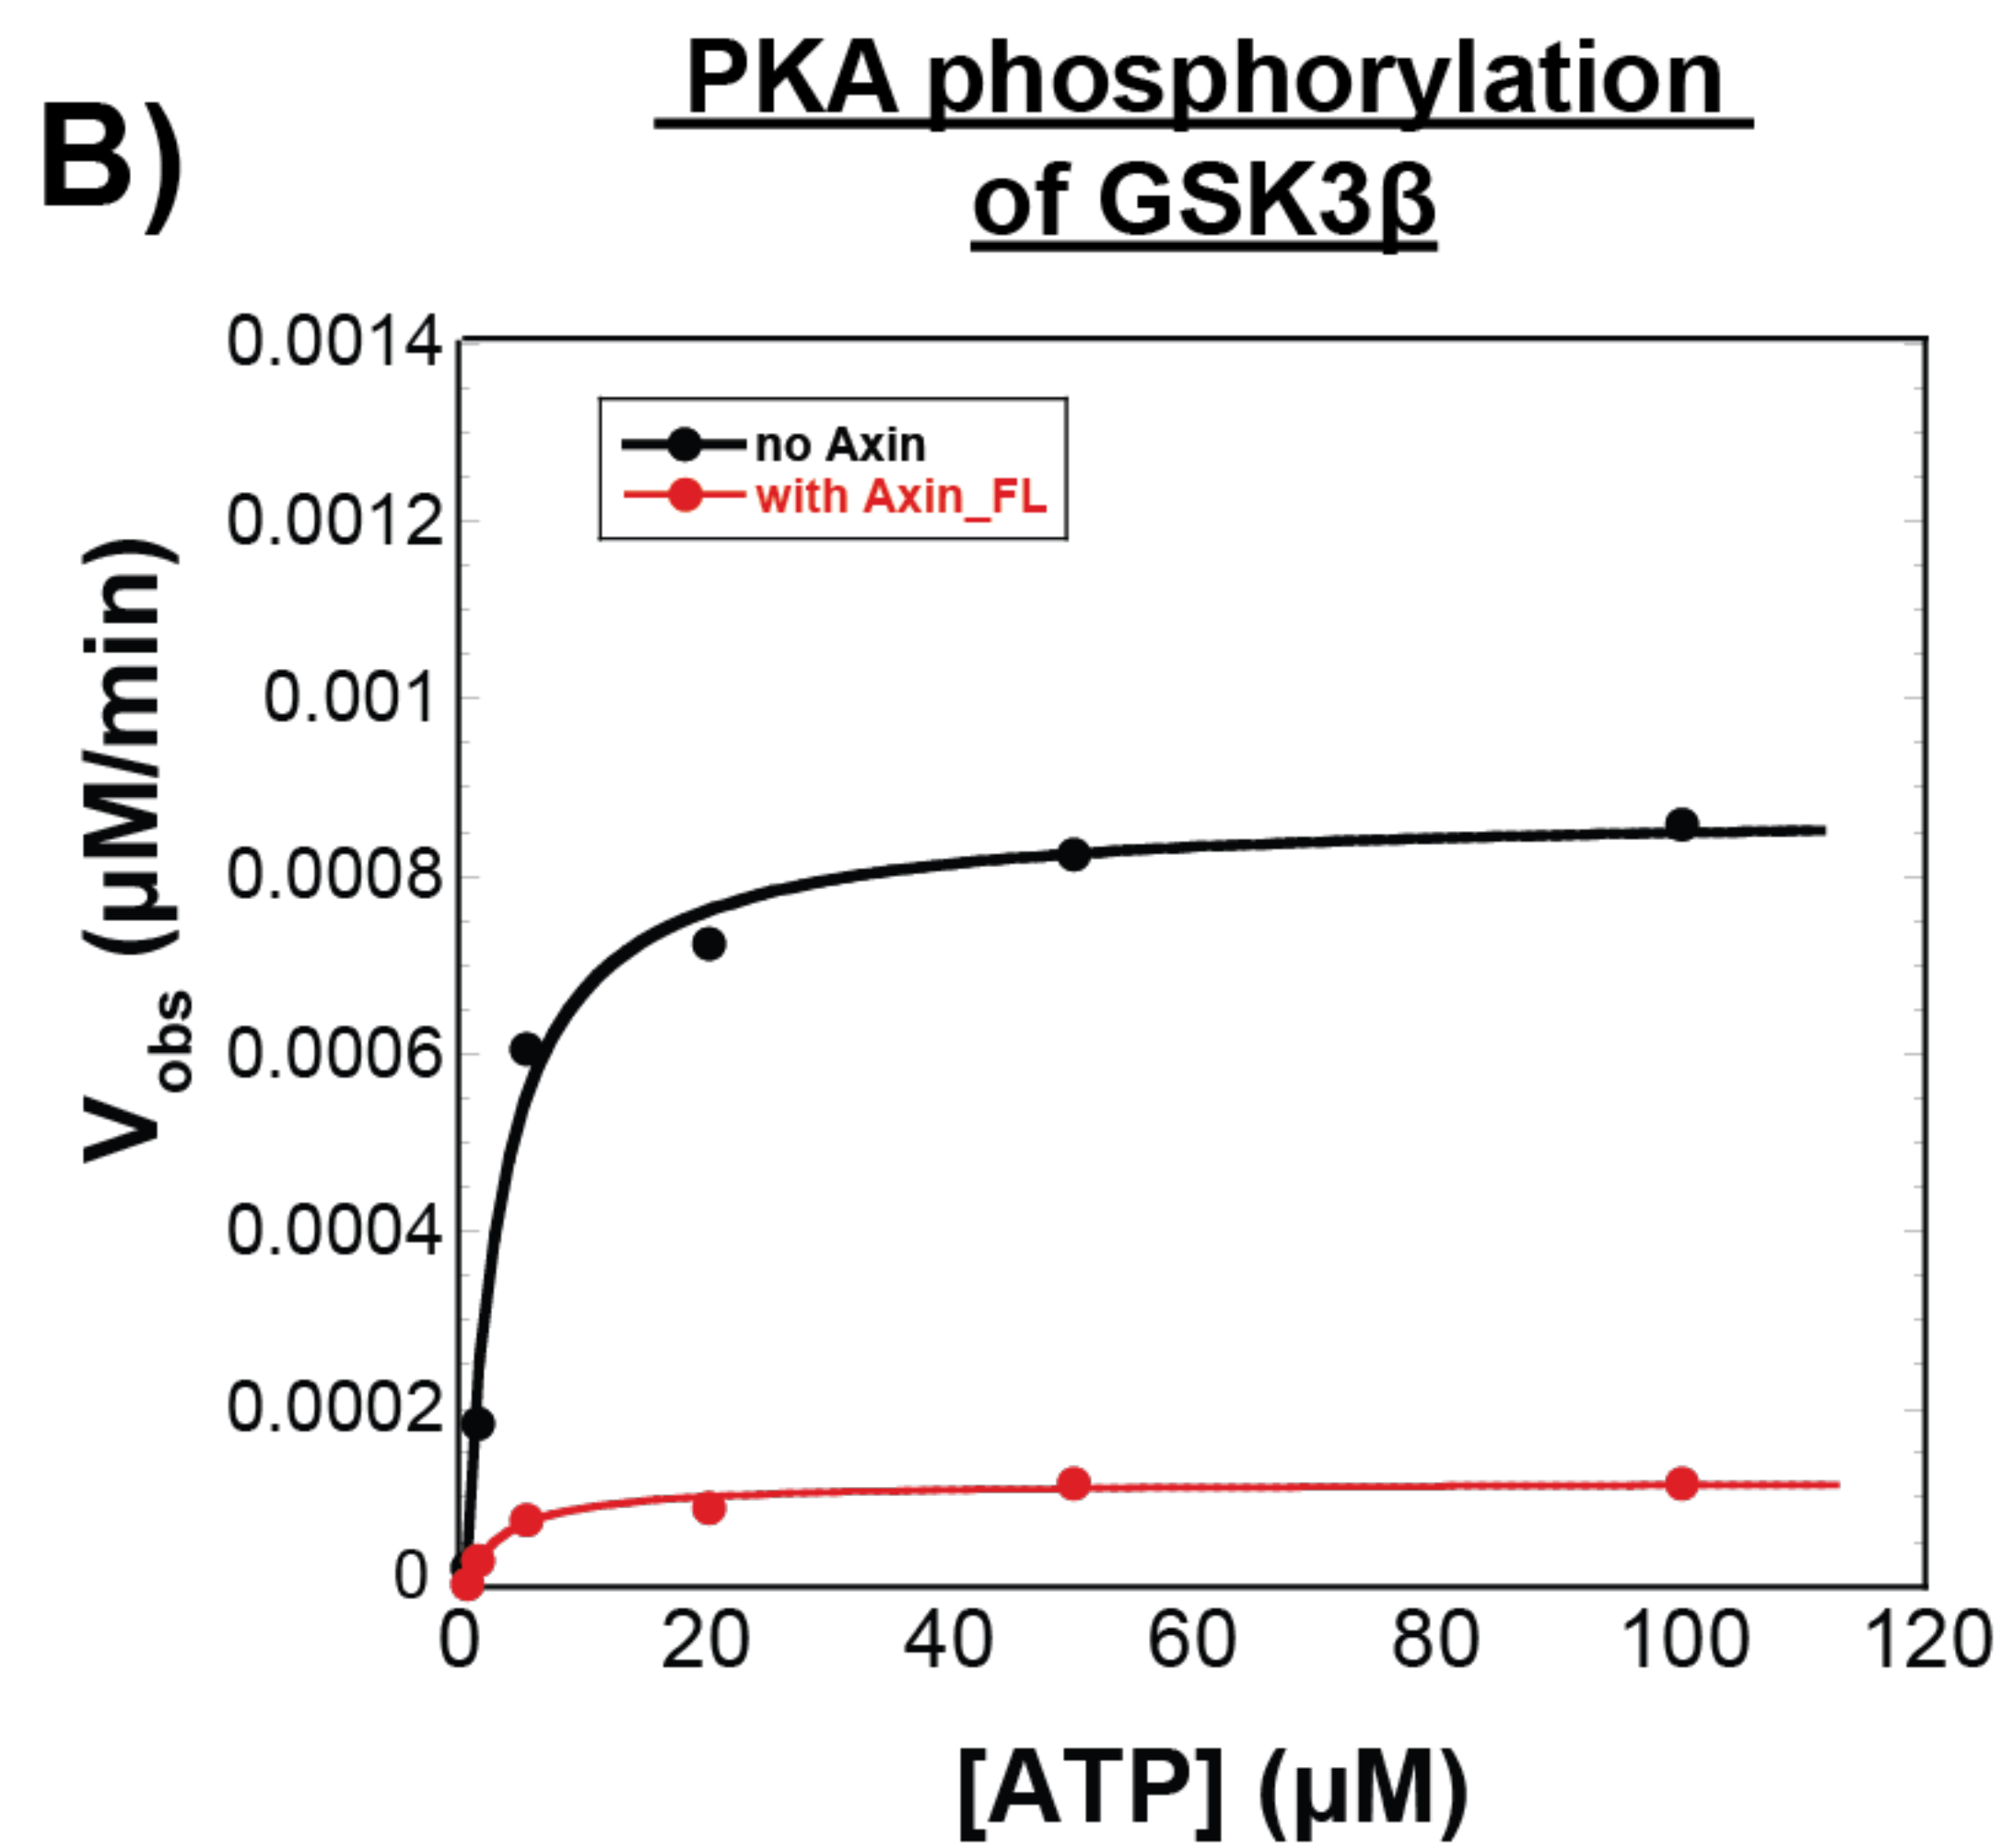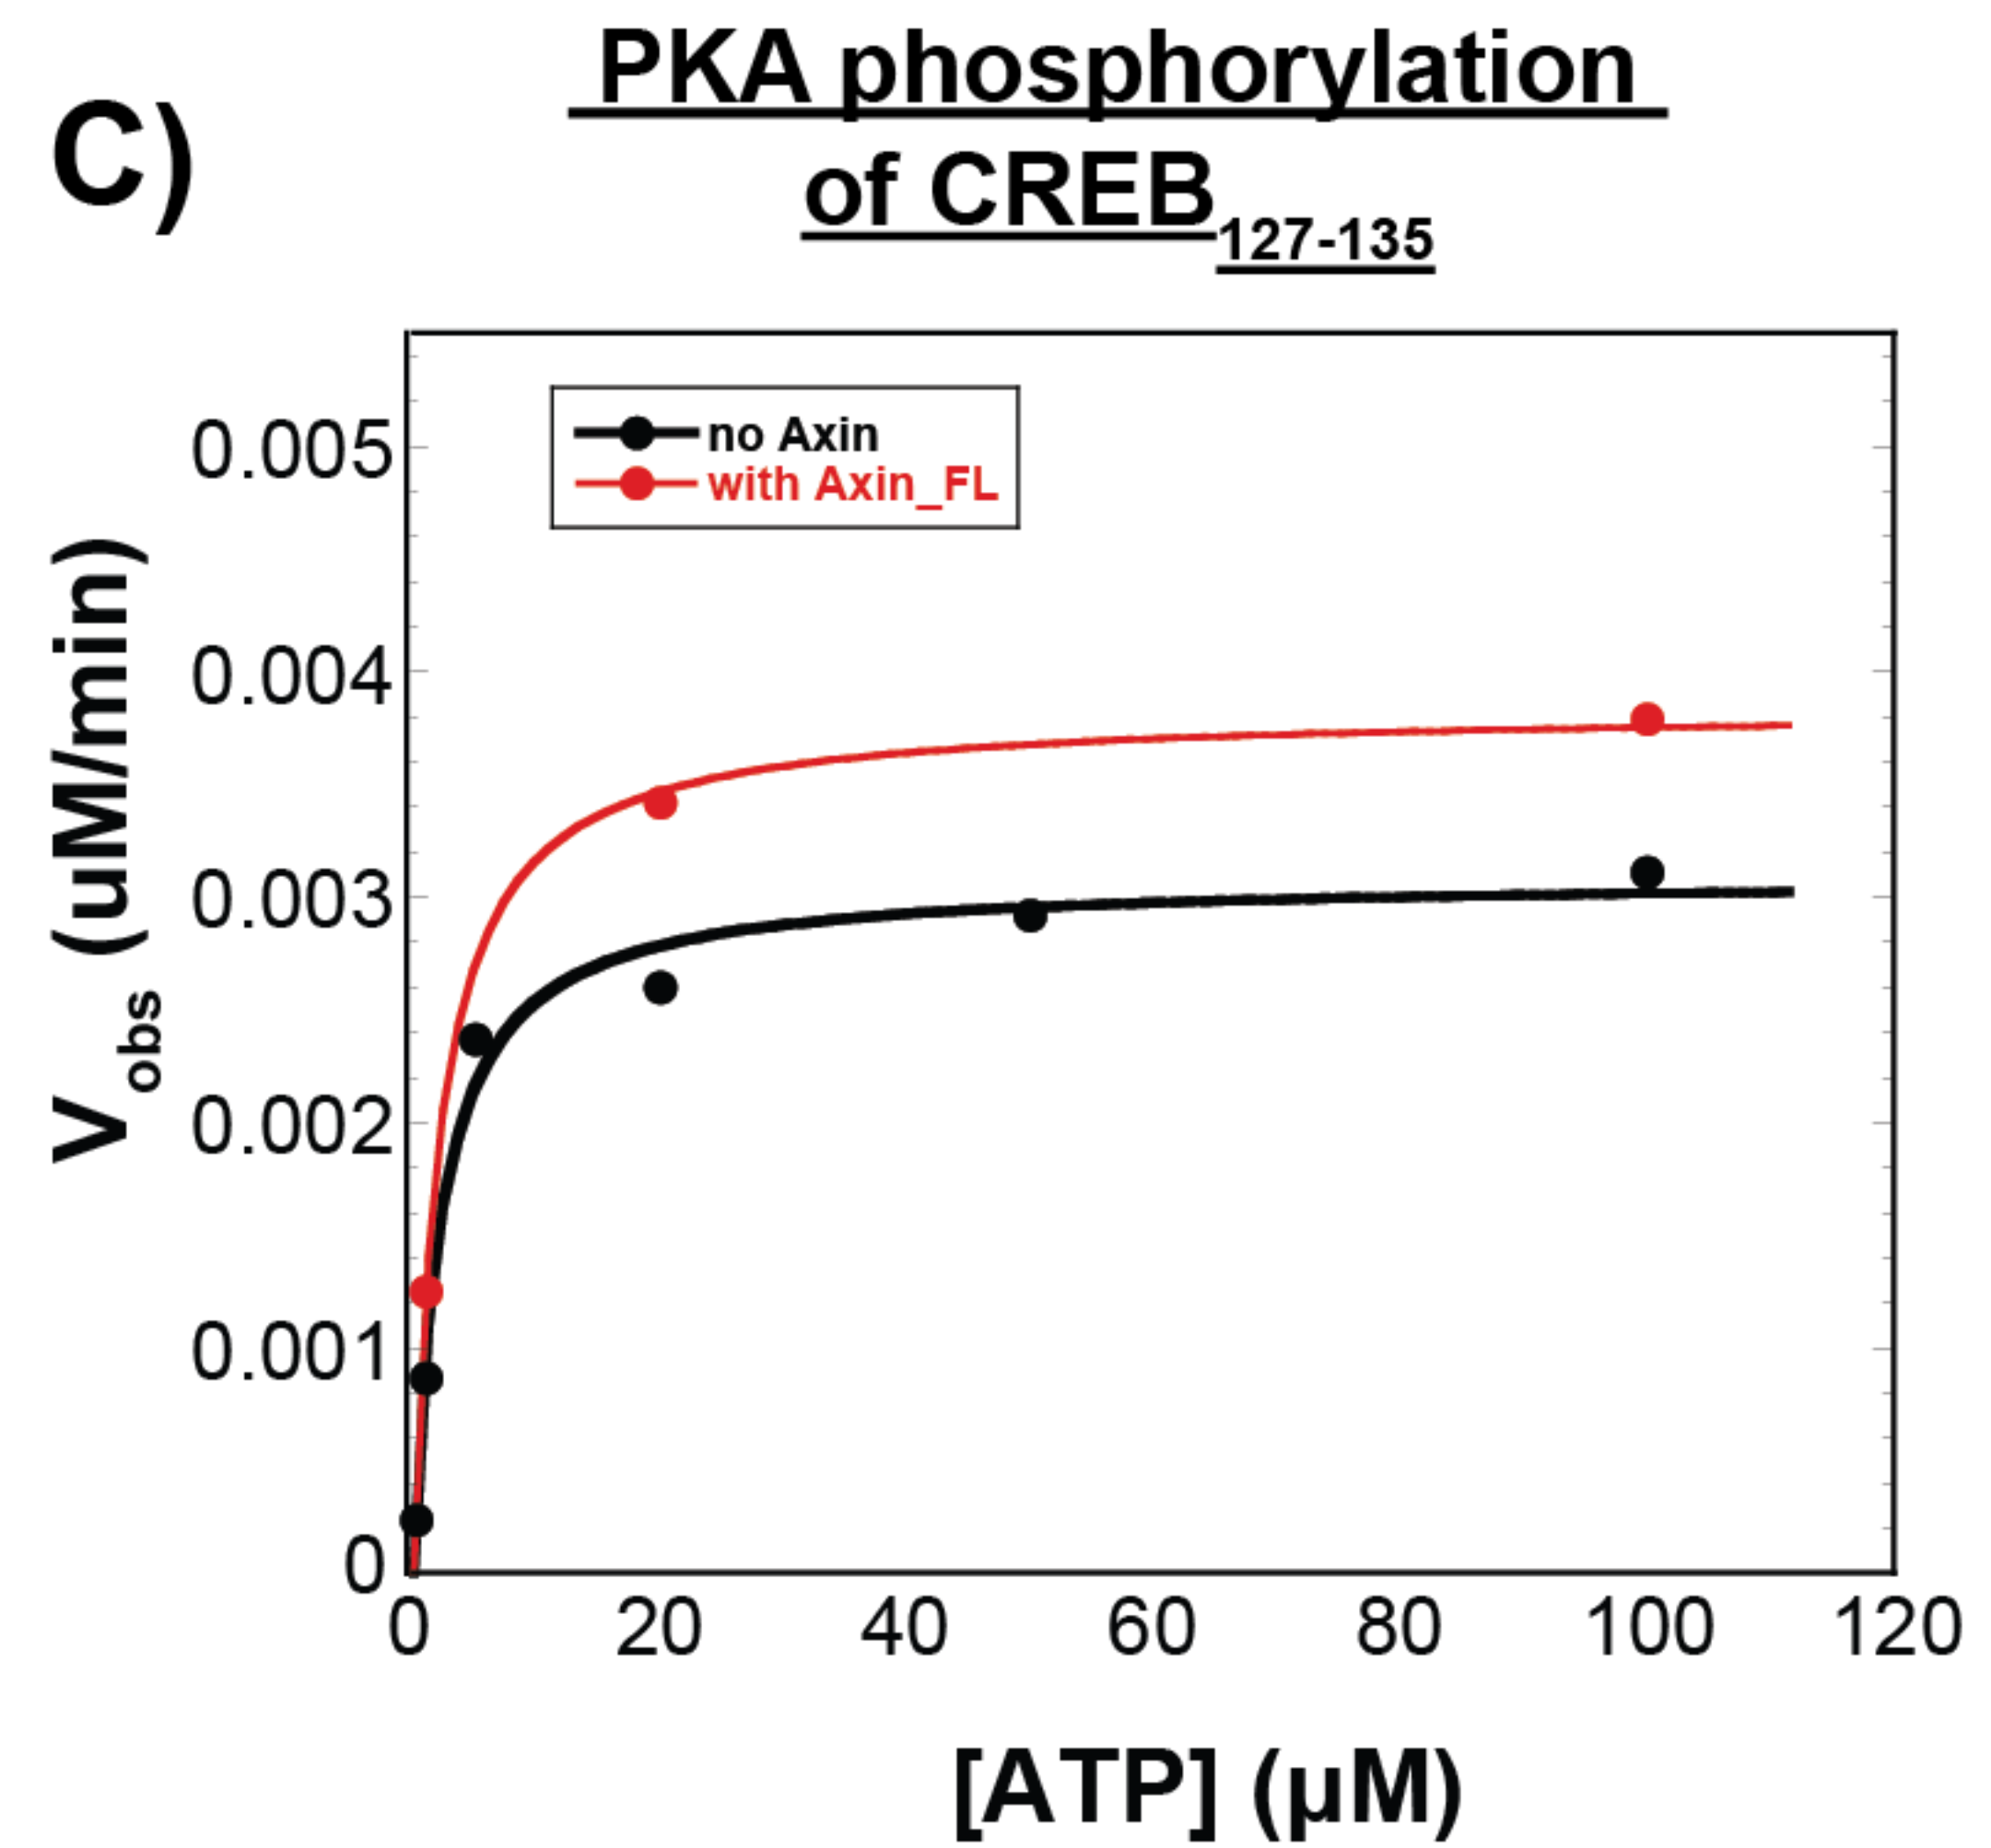

Supplement: supp [file elife-85444-supp-v1.zip]
